# Supplementary material for: Computational prediction of splicing regulatory elements shared by Tetrapoda organisms
Source: PubMed Central journal article supplement (PMC2777938; doi:10.1186/1471-2164-10-508), 2009-11-04
Supplement: 1471-2164-10-508-S1.pdf [file 1471-2164-10-508-S1.pdf]

# Supplementary materials

## 1 Counting tree to predict elements

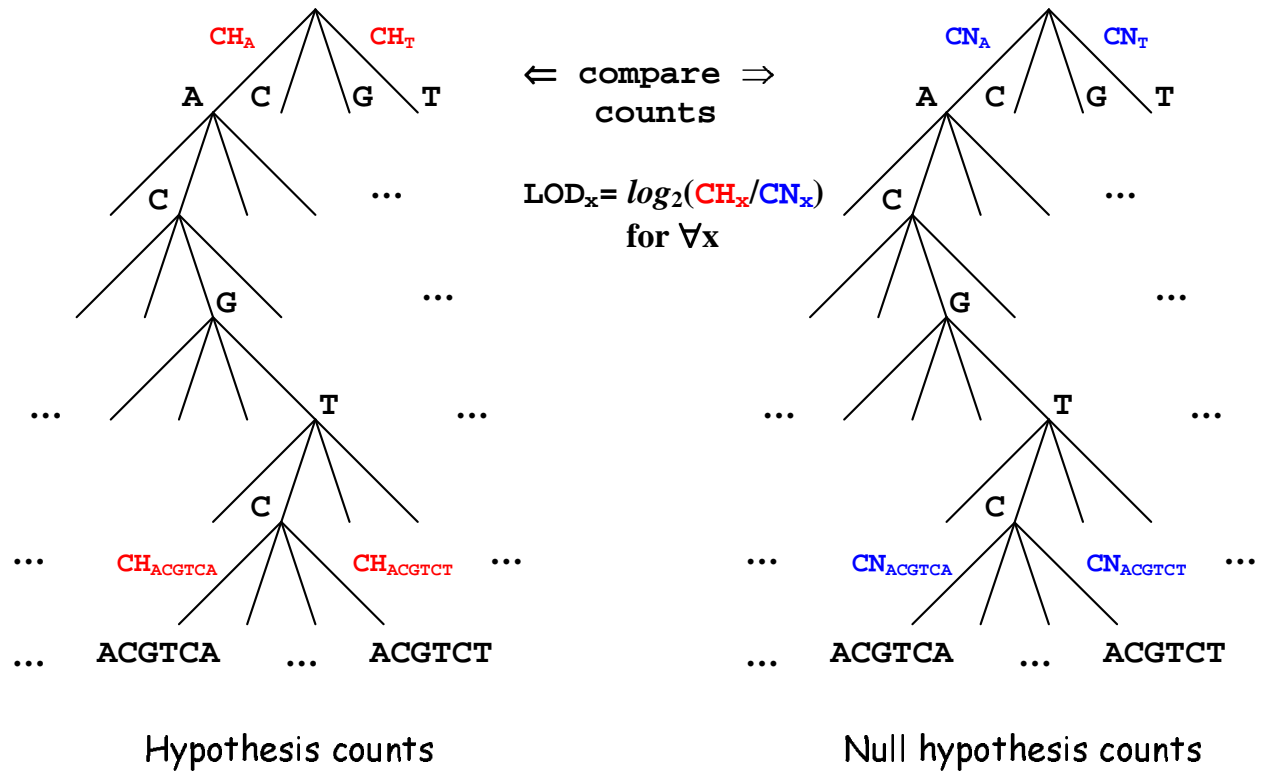

Figure 1: In the prefix tree structure we compare the number of times a certain internal node is traversed in the tree in hypothesis and null hypothesis cases as we insert octamers. Certain nodes are marked as significant if  $LOD_X \geq \log_2(3)$  or  $LOD_X \leq \log_2(\frac{1}{3})$  when at least one of the counts compared exceeds 63. This way we examine all the possible oligos and suboligos of size up to 8 nt for the statistically significant density deviation in SS proximity as compared to deep intronic or exonic sequences.

## 2 Elements overlap

Table 1: Overlap for the groups of elements discovered. Here is shown the ratio between the actual and expected number of matches under null hypothesis (expected intersection between the same number of randomly generated oligos).

| Elements  | 5'SS ISEs   | 3'SS ISEs   | 5'SS ISSs | 3'SS ISSs    | 5'SS ESEs | 3'SS ESEs | 5'SS ESSs | 3'SS ESSs |
|-----------|-------------|-------------|-----------|--------------|-----------|-----------|-----------|-----------|
| 5'SS ISEs | 1,892/49.11 | 30/65.72    | 0/21.90   | 99/91.96     | 0/1.65    | 0/6.98    | 18/2.67   | 12/1.20   |
| 3'SS ISEs | 30/65.72    | 3,136/70.81 | 0/33.51   | 14/123.23    | 4/1.98    | 3/9.72    | 7/3.23    | 0/1.14    |
| 5'SS ISSs | 0/21.90     | 0/33.51     | 536/8.68  | 168/40.47    | 0/0.79    | 52/3.03   | 2/1.26    | 0/0.65    |
| 3'SS ISSs | 99/91.96    | 14/123.23   | 168/40.47 | 3,272/163.68 | 0/3.00    | 9/13.39   | 20/4.73   | 7/2.23    |
| 5'SS ESEs | 0/1.65      | 4/1.98      | 0/0.79    | 0/3.00       | 28/0.05   | 0/0.24    | 0/0.08    | 0/0.03    |
| 3'SS ESEs | 0/6.98      | 3/9.72      | 52/3.03   | 9/13.39      | 0/0.24    | 92/0.97   | 0/0.40    | 0/0.18    |
| 5'SS ESSs | 18/2.67     | 7/3.23      | 2/1.26    | 20/4.73      | 0/0.08    | 0/0.40    | 42/0.13   | 6/0.05    |
| 3'SS ESSs | 12/1.20     | 0/1.14      | 0/0.65    | 7/2.23       | 0/0.03    | 0/0.18    | 6/0.05    | 17/0.02   |

Table 2: Overlap of predicted elements with known splicing enhancers and silencers from the AEDB database [1].

| Elements type  | Known enhancers and silencers                                                                                                                                                                                                                                                                                                                                                                                                                                                                                                                                                      |
|----------------|------------------------------------------------------------------------------------------------------------------------------------------------------------------------------------------------------------------------------------------------------------------------------------------------------------------------------------------------------------------------------------------------------------------------------------------------------------------------------------------------------------------------------------------------------------------------------------|
| 5'SS ISEs/ISSs | CAAGG(db004), CACCA(db103), CATGG(db005), CTCTC(db171), CTCTCT(db170), GAAGAA(db206), GAGGAAGAA(db125), GGGTG(db216), TCTCTCT(db170), GGGGG(db131)                                                                                                                                                                                                                                                                                                                                                                                                                                 |
| 3'SS ISEs/ISSs | AAAGAAGG (db107), ACACC (db103), ACTCACC (db152), AGAGCAGG (db200), AGATCC (db043), CAAGG (db004), CACCA (db103), CATGG (db005), CTCTC (db171), GAAAGAA (db164), GAAAGAAG (db164), GAAAGGAGA (db042), GAAGAA (db206), GAAGAA (db206), GAAGAAAGA (db102), GAAGAAGA (db006), GAAGAAGAA (db038), GAAGAAGAA (db110), GAAGAAGAC (db008), GAAGAAGAG (db053), GAAGAAGG (db164), GAGGAAGAA (db125), GAGGAGGAG (db049), GAGGGAG (db216), GATGAAGAG (db087), GGGGATGGG (db019), GGGGG (db131), GGGTG (db216), TAGACA (db109), TCTTCTT (db219), TGCTGC (db175), TGTGGG (db052), TTACC (db152) |
| 5'SS ESEs/ESSs | GGGTG (db216)                                                                                                                                                                                                                                                                                                                                                                                                                                                                                                                                                                      |
| 3'SS ESEs/ESSs | GAGGGAG(db216), GGGGG (db131)                                                                                                                                                                                                                                                                                                                                                                                                                                                                                                                                                      |

Table 3: Systematic mutations experiment. Here the mutated sequences from silencer-mediated inhibition experiment shown in Figure 8 [2] are associated with the elements predicted. Here we show what elements appear or disappear in consecutive experiment and what relative change it causes on levels of isoforms 3 and 4 inclusion. Motifs added [+] after new round of mutations are shown in red and motifs removed [-] are shown in blue each followed by element type and LOD score.

| Sequences compared | Elements changing                                                                                                                                                                                                                                                                         | Isoforms inclusion level change (3)/(4) % |
|--------------------|-------------------------------------------------------------------------------------------------------------------------------------------------------------------------------------------------------------------------------------------------------------------------------------------|-------------------------------------------|
| WT ⇒ 2             | [+]AGGTGGAG (A.IE -2.85), [+]JAGTGGGG (A.IE -2.24), [+]CCTGCAGA (A.IE -1.89), [+]GAGCTGGG (A.IE -1.88), [+]GCAGAAG (A.IE -1.60), [-]GGAGGGG (A.IE -2.00), [-]TGGAGGG (A.IE -2.08)                                                                                                         | -24/+27                                   |
| 2 ⇒ 3              |                                                                                                                                                                                                                                                                                           | +4/-3                                     |
| 3 ⇒ 4              | [+]CCTGGAGG (A.IE -1.98), [+]GGAGGGG (A.IE -2.00), [+]TGGAGGG (A.IE -2.08)                                                                                                                                                                                                                | +10/-16                                   |
| 4 ⇒ 5              | [-]CCTGGAGG (A.IE -1.98), [-]GGAGGGG (A.IE -2.00), [-]TGGAGGG (A.IE -2.08)                                                                                                                                                                                                                | -20/+18                                   |
| 5 ⇒ 6              |                                                                                                                                                                                                                                                                                           | +3/+1                                     |
| 6 ⇒ 7              | [+]CCTGGAGG (A.IE -1.98), [+]TGGAGGTG (A.IE -1.70)                                                                                                                                                                                                                                        | +14/-8                                    |
| 7 ⇒ 8              | [+]GGAGGGG (A.IE -2.00), [+]TGGAGGG (A.IE -2.08), [-]TGGAGGTG (A.IE -1.70), [-]GGCGGGG (A.IE 1.67), [-]GGCGGGG (A.IE -1.61),                                                                                                                                                              | -12/+4                                    |
| 8 ⇒ 9              | [+]GGCGGGG (A.IE 1.67), [+]GGCGGGG (A.IE -1.61), (D.IE 2.03), [-]AGGTGGAG (A.IE -2.85), [-]GCAGGTGG (A.IE -1.79), [-]GGGGCAGG (A.IE -1.68), (D.IE 1.98), [-]TGGGGCAG (A.IE -1.85)                                                                                                         | +13/-6                                    |
| 9 ⇒ 10             | [+]AGGTGGAG (A.IE -2.85), [+]GCAGGTGG (A.IE -1.79), [+]GGGGCAGG (A.IE -1.68), [+]TGGGGCAG (A.IE -1.85), [-]GCAGGCAG (A.IE -2.24), [-]GTGCAGG (A.IE -1.59), [-]TGGTGCA (A.IE -1.64)                                                                                                        | -11/-5                                    |
| 10 ⇒ 11            | [+]GCAGGCAG (A.IE -2.24), [+]GTGCAGG (A.IE -1.59), [+]TGGTGCA (A.IE -1.64), [-]CCTGGAGG (A.IE -1.98), [-]GGAGGGG (A.IE -2.00), [-]TGGAGGG (A.IE -2.08)                                                                                                                                    | +13/-2                                    |
| 11 ⇒ 12            | [+]AAGAGGG (A.IE -2.35), [+]JAGAAGAGG (A.IE -2.65), [+]AGAGGGG (A.IE -1.86), [+]CCTGGAGG (A.IE -1.98), [+]GGAGGGG (A.IE -2.00), [+]TGGAGGG (A.IE -2.08)                                                                                                                                   | +23/-22                                   |
| 12 ⇒ 13            | [-]CCTGGAGG (A.IE -1.98), [-]GGAGGGG (A.IE -2.00), [-]TGGAGGG (A.IE -2.08)                                                                                                                                                                                                                | -13/+13                                   |
| 13 ⇒ 14            | [+]AGGGAGGG (A.IE -2.75), [+]CAGGGAGG (A.IE -1.72), [+]CCTGCAGG (A.IE -2.42), [+]CTGCAGGG (A.IE -1.73), [+]GCAGGGAG (A.IE -2.40), [+]GGGAGGGG (A.IE -2.00), [-]AAGAGGG (A.IE -2.35), [-]AGAAGAGG (A.IE -2.65), [-]AGAGGGG (A.IE -1.86), [-]CCTGCAGA (A.IE -1.89), [-]GCAGAAG (A.IE -1.60) | +24/-33                                   |
| 14 ⇒ 15            | [+]CCTGCAGA (A.IE -1.89), [+]GCAGAAG (A.IE -1.60), [-]AGGGAGGG (A.IE -2.75), [-]CAGGGAGG (A.IE -1.72), [-]CCTGCAGG (A.IE -2.42), [-]CTGCAGGG (A.IE -1.73), [-]GCAGGGAG (A.IE -2.40), [-]GGGAGGGG (A.IE -2.00)                                                                             | -13/+15                                   |
| 15 ⇒ 16            | [+]CCTGGAGG (A.IE -1.98), [+]TGGAGGG (A.IE -2.08), [-]CCTGCAGA (A.IE -1.89), [-]GCAGAAG (A.IE -1.60)                                                                                                                                                                                      | -10/+15                                   |
| 16 ⇒ 17            | [+]CCTGCAGA (A.IE -1.89), [+]GCAGAAG (A.IE -1.60)                                                                                                                                                                                                                                         | -6/+7                                     |

Table 4: Systematic mutations experiment. Here the mutated sequences from silencer-mediated inhibition experiment shown in Figure 9(c) [2] are associated with the elements predicted. Here we show what elements appear or disappear in consecutive experiment and what relative change it causes on levels of IVS-78 isoform inclusion. Motifs added [+] after new round of mutations are shown in red and motifs removed [-] are shown in blue each followed by element type and LOD score.

| Sequences compared                                   | Elements changing                                                                                                                               | Isoform inclusion change % | IVS-78 level |
|------------------------------------------------------|-------------------------------------------------------------------------------------------------------------------------------------------------|----------------------------|--------------|
| <i>LIPC</i> - <i>WT</i> $\Rightarrow$ <i>ESS</i> - 1 | <span style="color: blue;">[-]</span> GGAGGGC (A.IE -1.75)                                                                                      |                            | 15           |
| <i>ESS</i> - 1 $\Rightarrow$ <i>ESS</i> - 2          |                                                                                                                                                 |                            | -4           |
| <i>ESS</i> - 2 $\Rightarrow$ <i>ESS</i> - 3          | <span style="color: red;">[+]CGAGAA (A.IE -2.10), [+]GAGAAGC (A.IE -2.12),</span><br><span style="color: blue;">[-]AGACGG (A.IE -1.61)</span>   |                            | -2           |
| <i>ESS</i> - 3 $\Rightarrow$ <i>ESS</i> - 4          | <span style="color: blue;">[-]CGAGAA (A.IE -2.10), [-]GAGAAGC (A.IE -2.12)</span>                                                               |                            | 11           |
| <i>ESS</i> - 4 $\Rightarrow$ <i>ESS</i> - 5          |                                                                                                                                                 |                            | -11          |
| <i>ESS</i> - 5 $\Rightarrow$ <i>ESS</i> - 6          | <span style="color: red;">[+]GGAGGGA (A.IE -2.49), [+]GGAGGGC (A.IE -1.75),</span><br><span style="color: blue;">[-]GAGAAGA (A.IE -2.33)</span> |                            | -73          |
| <i>ESS</i> - 6 $\Rightarrow$ <i>ESS</i> - 7          | <span style="color: red;">[+]GAGAAGA (A.IE -2.49), [-]GGAGGGA (A.IE -2.49),</span><br><span style="color: blue;">[-]GGAGGGC (A.IE -1.75)</span> |                            | 84           |
| <i>ESS</i> - 7 $\Rightarrow$ <i>ESS</i> - 8          | <span style="color: red;">[+]GGAGGGA (A.IE -2.49), [-]GAGAAGA (A.IE -2.49)</span>                                                               |                            | -6           |
| <i>ESS</i> - 8 $\Rightarrow$ <i>ESS</i> - 9          | <span style="color: red;">[+]GAGAAGA (A.IE -2.49), [-]GGAGGGA (A.IE -2.49)</span>                                                               |                            | -1           |
| <i>ESS</i> - 9 $\Rightarrow$ <i>ESS</i> - 10         | <span style="color: red;">[+]AGACGG (A.IE -1.61)</span>                                                                                         |                            | -71          |
| <i>ESS</i> - 10 $\Rightarrow$ <i>ESS</i> - 11        | <span style="color: blue;">[-]AGACGG (A.IE -1.61)</span>                                                                                        |                            | 67           |
| <i>ESS</i> - 11 $\Rightarrow$ <i>ESS</i> - 12        |                                                                                                                                                 |                            | -21          |
| <i>ESS</i> - 12 $\Rightarrow$ <i>ESS</i> - 13        |                                                                                                                                                 |                            | -31          |
| <i>ESS</i> - 13 $\Rightarrow$ <i>ESS</i> - 14        | <span style="color: red;">[+]TAGGTC (A.EE 1.72)</span>                                                                                          |                            | 4            |

### 3 Clustering MHMM topology

We used Mixture of Hidden Markov Model (MHMM) topology as implemented in `MHMMotif` tool [3] to conduct unsupervised clustering of the detected oligonucleotides having statistically significant biases associated with splice sites proximity.

The topology used allows detection of core motif elements of size 6 nt as shown in Figure 2. All the statistically significant elements found have been combinatorially extended to the size of 8 nt with addition of two dummy nucleotides on each side for the motif to be placed within functionally significant area for learning plus 'X' character at the end to make sure an oligonucleotide is properly threaded through the motif model as the learning proceeds. We chose the number of possible clusters equal to 15 as a conservative estimate for the number of possible core motifs in each group of elements, which correlates well with the number of core motifs predicted by other methods [4, 5]. Larger number of clusters would result in overfitting while the smaller number would not be representative enough to properly model the phenomena.

Unsupervised Expectation Maximization (EM) learning of the topology allows simultaneous detection of core motifs sized 6 nt and their corresponding frequencies. Motif representation with HMM is strictly better than weight matrix representation since it models the dependencies between neighboring nucleotide positions and allows for Maximum A posteriori (MAP) classification of oligos.

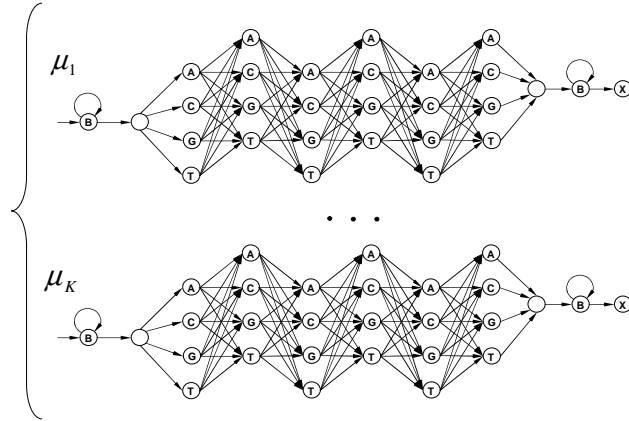

Figure 2: MHMM topology used for clustering. Here  $B$  stands for the background state and  $X$  is the special state to assure that only the oligos entirely threaded through the model are scored towards the parameters of the model.





D.IE.12 0.052

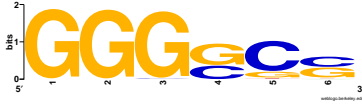

AGGGCGG, AGGGGCGG, AGGGGGCC, AGGGGGTG, ATGGGCAG,  
CAGGGCCG, CCGGGCCC, CCGGGCCG, CCGGGCC, CCGGGCCC,  
CGGGCCG, CGGGCGC, CGGGCTGG, CGGGGAC, CGGGGCC,  
CGGGGCC, CGGGGCCG, CGGGGCCT, CGGGGCG, CGGGGCGG,  
CGGGGGCC, CGGGGTG, CGGGGTGG, CTGGGCC, CTGGGCCG,  
CTGGGGCG, CTGGGGCC, CTGGGGCG, GAGGGGAC,  
GCGGGGCG, GGGCAGGG, GGGCCCC, GGGCCCC, GGGCCCCG,  
GGGCCCT, GGGCCCG, GGGCCCTG, GGGCCG, GGGCCTGG,  
GGGGCC, GGGCGTG, GGGCTCG, GGGCTCGG, GGGCTGGG,  
GGGGCACC, GGGGCAGG, GGGGCC, GGGGCC, GGGGCCA,  
GGGGCCCC, GGGGCCG, GGGGCCCT, GGGGCC, GGGGCCG,  
GGGGCCT, GGGGCCTC, GGGGCCTG, GGGGCG, GGGGCG,  
GGGGCGC, GGGGCGG, GGGGCGG, GGGGCGG, GGGGCTG,  
GGGCTGG, GGGGCC, GGGGGCC, GGGGGCCG, GGGGGCC,  
GGGGCGG, GGGGGCC, GGGGGCC, GGGGGCG, GGGTGGG,  
GTGGGCC, GTGGGGCG, GTGGGGAC, GTGGGCC,  
GTGGGGCG, TGGGGCCC, TGGGGCAC, TGGGGCC, TGGGGCC,  
TGGGGCC, TGGGGCCG, TGGGGCCT, TGGGGCG, TGGGGCG,  
TGGGGCC, TGGGGCC

D.IE.13 0.053

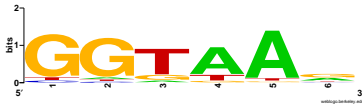

CCTGTAA, CCTGTAAT, CGGGTGGG, GGTAAG, GGTA,  
GGTAAAG, GGTAAT, GGTAAG, GGTAAGA, GGTAAGG,  
TCTGTAAA, TGTAAG

D.IE.14 0.027

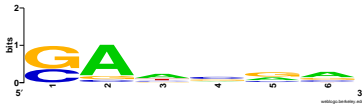

ACACACA, ACACACAC, AGAAGAAG, AGACAGAG, AGAGAGA,  
AGAGAGAC, AGAGAGAG, CAACGA, CACACAC, CACACACA,  
CACCACCA, CAGAAGAG, CAGAGAAG, CAGAGAGA, GAAGGA,  
GAGAAGCA, GAGACAGA, GAGAGACA, GAGAGAGA, GATCGA,  
GGACTAC, TACAGATG

D.IE.15 0.043

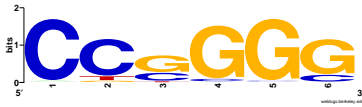

ACCCTCCT, ACCGGGC, ACCGGGG, ACTGGGCC, ACTGGGGA,  
CACCGGG, CCAGGCGG, CCAGGGGC, CCCATGGG, CCCCCGGG,  
CCCCGGG, CCCCCGGC, CCCCCGGG, CCGGG, CCGGGC,  
CCCGGGCA, CCGGGCC, CCGGGG, CCGGGGA, CCGGGGC,  
CCCGGGGG, CCCTCCG, CCCTGCCG, CCGGG, CCGGGCAG,  
CCGGGCT, CCGGGCTG, CCGGG, CCGGGGA, CCGGGC,  
CCGGGGCA, CCGGGGCC, CCGGGGCG, CCGGGCT, CCGGGG,  
CCGGGGG, CCGGGGG, CCGGGGT, CCGGGTG, CCTGGCG,  
CCTGGGC, CTCGGG, CTGGGGAC, CTGGGG, CTGGGGCA,  
CTGGGGTC, GCCAGGG, GCCAGGG, GCCCGGG, GCCCGG,  
GCCCGGC, GCCCGGG, GCCGGG, GCCGGGA, GCCGGGC,  
GCCGGGG, GCCTGGG, GCTGGG, GCTGGGC, GCTGGGG,  
GCTGGGG, GCTTGGG, GCCAGGG, GCCCGGG,  
GCCCGGG, GGCTCGG, GGCTGGC, GGCTGGG, TCCGGG



## 4.2 3'SS ISEs/ISSs

A.IE.1 0.018

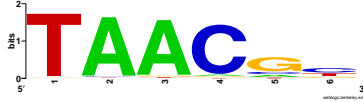

AATAACAT, AATGTAAC, AGTAACTT, ATAACATT, ATAACTGA,  
 GTAACATT, GTAACTTT, GTTAAACAT, GTTAAACC, TAACACT,  
 TAACACTT, TAACATTT, TAACCATT, TAACCCTT, TAACCTTT,  
 TAACGC, TAACGT, TAACGTG, TAACGTT, TAACCTTT,  
 TAACTGTG, TAACTTTG, TAATGTGT, TGTAACCT, TTAACACT,  
 TTAACCTT, TTAACCTCA, TTAACCTCT, TTAACCTGA, TTAACCTTA,  
 TTAATTTT, TTAAACAA, TTTAACG, TTTGTAAC

A.IE.2 0.048

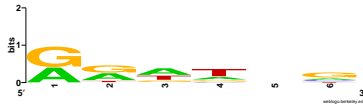

AAAATGTT, AAGATAG, AAGATCC, AAGATGG, ACATTGT,  
 AGAATAG, AGAATGG, AGATAG, AGATAGA, AGATAGG, AGATCG,  
 AGATGAG, AGATGAGG, AGATGGA, AGATGGG, AGATTAG,  
 AGGATAG, AGGATGG, ATATTAT, ATTATTG, ATTTTATT,  
 CAGATAG, CAGATGAG, GAATTGG, GAGATAG, GAGATGG,  
 GATATTAA, GATGAGG, GATTCG, GATTTGAA, GGAATAG,  
 GGATAGA, GGATCAG, GGATCG, GGATGAG, GGATGGA,  
 GGATGGG, GGATTAC, GGATTAG, GGATTGG, GGGATGG,  
 GGGATGGG, GGGATTA, GGGATTG, TAAATTG, TAATCATT,  
 TAATTGAT, TAATTTCT, TAGATAG, TAGATGG, TATTGATG,  
 TGGATAG, TGGGATTA, TTGATTAA

A.IE.3 0.028

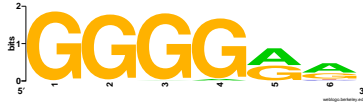

AGGGGAA, AGGGGAAG, AGGGGAG, AGGGGAGG, AGGGGG,  
 AGGGGGA, AGGGGGAG, AGGGGGG, CGGGGAG, CGGGGAGG,  
 CTGGGGAG, GAGGGGAG, GCGGGGG, GGGGAA, GGGGAAA,  
 GGGGAAAA, GGGGAAC, GGGGAAG, GGGGAAGG, GGGGAG,  
 GGGGAGA, GGGGAGG, GGGGATG, GGGGGA, GGGGGAA,  
 GGGGGAG, GGGGGAGG, GGGGGCA, GGGGGG, GGGGGGA,  
 GGGGGGG, GGGGGGGG, GTGGGGAG, GTGGGGGG, TGGGGAA,  
 TGGGGAAG, TGGGGAG, TGGGGAGA, TGGGGAGG, TGGGGGA,  
 TGGGGGAG, TGGGGGG, TTGGGGA, TTGGGGAG, TTGGGGG,  
 TTTGGGAA

A.IE.4 0.041

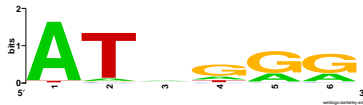

AAAATGGA, AATAGGA, AATAGGG, AATTAGG, ATAGAGG,  
 ATAGGAA, ATAGGAG, ATAGGCA, ATAGGG, ATAGGGA,  
 ATAGGGT, ATATGGG, ATATTTT, ATCAAGG, ATCAGAG,  
 ATCGAG, ATCGGG, ATGGAGG, ATGGGAG, ATGGGGA,  
 ATGGGGG, ATTGGAG, ATTGGGA, ATTGGGG, CATAGAG,  
 CATAGGA, CATAGGG, CATTAGG, CTATGGG, GAAATGGA,  
 GAATGGG, GATAAGG, GATAGAG, GATAGGA, GATGGAG,  
 GATTAGA, GATTGGG, GCATTAG, TATAGG, TATAGGA, TATATTA,  
 TATATTT, TATGAGG, TATGGGG, TATTAGC, TCGGGA,  
 TTCGGA, TTCGGG

A.IE.5 0.046

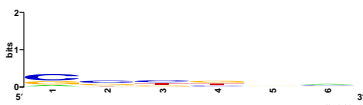

AAACTGAC, AAATGACC, AACTGAC, AAGTGCTG, ACACTGAC, ACGCTGA, AGACTGAC, AGAGCTGG, AGCCCTGA, AGCTGAC, AGGCTGAC, AGGGCTGG, AGTGCTGG, ATACTGAT, ATGACTGA, ATGCTGAC, ATGCTGAT, ATTCTGAC, CACCCTGA, CACTGAC, CACTGAT, CACTGATT, CAGCTGAC, CAGGCTGG, CAGTGACC, CATCTGAC, CATGCTGA, CCACCTGA, CCACTGAC, CCACTGAT, CCACTGCA, CCAGCTGA, CCCACTGA, CCCCCTGA, CCCCCTGA, CCCCCTGA, CCCCCTGA, CCGCTCA, CCGCTGA, CCGCTGAC, CCGTGAC, CCTGTGCA, CCTGTGAC, CGCTCAC, CGCTGA, CGCTGAC, CGTGACC, CTCACTGA, CTCCTGA, CTCGGTC, CTGCTGAC, CTGCTGAT, CTGGCTGA, CTTACTGA, CTTCTGAC, CTTCTGAT, CTTGCTGA, CTTGTGAC, GACTGAC, GAGCTGAC, GAGCTGG, GAGCTGGA, GAGCTGGG, GAGGCTGG, GATGCTGA, GCACTCAC, GCACTGAC, GCAGCTGG, GCCCCTCA, GCCCCTGA, GCCCTGAT, GCCGCTC, GCGCTGA, GGACTGAC, GGAGCTGG, GGACTCA, GGCCCTCA, GGCCCTGA, GGCCTGA, GGCTGAC, GGGACTGA, GGGCCTGA, GGGCTGAC, GGGCTGA, GGTCCTGA, GGTCTGAC, GGTGCTGG, GTCCCTGA, GTCTGAC, GTCTGAT, GTGACTCT, GTGCTGAC, GTGCTGAT, GTGCTGG, GTTCTGAC, GTTCTGAT, TAACTGAT, TAATGACT, TACTGAC, TAGCTGG, TCACCTCT, TCACGCT, TCACTCAC, TCACTCAT, TCACTCTC, TCACTGAC, TCCACTCA, TCCCCTGA, TCCCTGAT, TCCTGCAG, TCTGCTAA, TGACCTCC, TGACCTCT, TGACCTGC, TGACCTGT, TGACGCC, TGACGCT, TGACTGAC, TGACTGAT, TGACTGCT, TGCTGAC, TGGCTGAC, TGGGCTGA, TGGGCTGG, TGGTCTGA, TGCTGACT, TGTACTGA, TGTCTGAC, TGTCTGAT, TGTGCTGA, TTACTGAC, TTACTGAT, TTCACTGA, TTCTGAC, TTGACTGA, TTGCTGAC, TTGCTGAT, TTTCTGAC, TTTCTGAT

A.IE.6 0.14

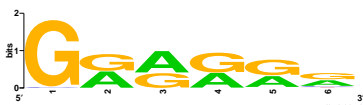

AAGAAAAG, AAGAAAAGA, AAGAAAAG, AAGGAAGA, AGAAAAG, AGAAAAGA, AGAAAAGG, AGAAAAGA, AGAAAGAA, AGAAAGAG, AGAAAGAG, AGAAGGA, AGAAGGAA, AGAGAAG, AGAGAAGT, AGAGGAG, AGAGGGA, AGGAAAAG, AGGAAAAG, AGGAAAAGA, AGGAAAAGG, AGGAAAGA, AGGAAGAA, AGGAAGAG, AGGAAGGA, AGGAAGGG, AGGAGAG, AGGAGAG, AGGAGAGA, AGGAGAGG, AGGAGGA, AGGAGGAA, AGGAGGAG, AGGAGGGA, AGGAGGGG, AGGGAAGA, AGGGAAG, AGGGAAGA, AGGGAAGG, AGGGAAGA, AGGGAGAG, AGGGAGGA, AGGGAGGG, ATGAAGAA, ATGAGAG, ATGGAAG, CAGAAGGA, CAGAGAAG, CAGAGGAG, CAGAGGGA, CAGGAGAG, CAGGAGGA, CCGGGAG, CGAGAA, CGAGAA, CGGGAGG, CTGAGGCA, CTGGAAG, CTGGAGA, CTGGAGAA, CTGGAGG, CTGGAGGA, CTGGGAGG, GAAAAAAG, GAAAAAGA, GAAAAAGA, GAAAAGAA, GAAAAGG, GAAAGAA, GAAAGAAA, GAAAGAG, GAAAGG, GAAAGGA, GAAAGGAA, GAAGAG, GAAGAGG, GAAGGA, GAAGGAA, GAAGGAAA, GAAGGCA, GAAGGG, GAAGGGA, GAGAAAAGA, GAGAAAAGG, GAGAAAG, GAGAAGC, GAGAAGG, GAGAAGGA, GAGAAGGG, GAGAGA, GAGAGAA, GAGAGAAA, GAGAGAAAG, GAGAGAGA, GAGAGG, GAGAGGA, GAGAGGAG, GAGAGGG, GAGAGGGA, GAGGAA, GAGGAAAA, GAGGAAGA, GAGGAAGG, GAGGAG, GAGGAGC, GAGGAGGA, GAGGAGGG, GAGGATC, GAGGGA, GAGGGAA, GAGGGCA, GAGGGGA, GAGGGGG, GGAAGAAG, GGAAGA, GGAAGAG, GGAAGAGG, GGAACAG, GGAAGA, GGAAGAA, GGAAGAAA, GGAAGAG, GGAAGAGA, GGAAGAGG, GGAAGAT, GGAAGG, GGAAGGA, GGAAGGAA, GGAAGGAG, GGAAGGG, GGAAGGGA, GGAGAA, GGAGAAA, GGAGAAAG, GGAGAAG, GGAGAAGA, GGAGAAGG, GGAGAGA, GGAGAGAG, GGAGAGC, GGAGAGG, GGAGAGGA, GGAGAGGG, GGAGATA, GGAGATG, GGAGGA, GGAGGAA, GGAGGAAAG, GGAGGAC, GGAGGAG, GGAGGAG, GGAGGAGG, GGAGGAT, GGAGGCA, GGAGGGC, GGAGGG, GGAGGGA, GGAGGGAA, GGAGGGAG, GGAGGGC, GGAGGGG, GGAGGGGA, GGAGGGGG, GGGAAAG, GGGAAG, GGGAGA, GGGAGAG, GGGAAGG, GGGAGGA, GGGAGGG, GGGAAAGT, GGGAGAA, GGGAGAAG, GGGAGAG, GGGAGAGA, GGGAGAGG, GGGAGCA, GGGAGG, GGGAGGA, GGGAGGAG, GGGAGGG, GGGAGGG, GGGAGGGA, GGGAGGGG, GGGAGGGT, GGGAGGT, GGGAGGTG, GGGAGGAG, GGGAGGA, GGGAGGG, GTGGAAG, GTGGAGA, GTGGAGG, TCGAGA, TGAGGAA, TGAGGAAA, TGAGGAG, TGAAGA, TGAAGG, TGGAGAA, TGGAGAAG, TGGAGAG, TGGAGG, TGGAGGA, TGGAGGAG, TGGAGGG, TGGAGGTG, TGGGAAG, TGGGAAGA, TGGGAAGG, TGGGACA, TGGGAG, TGGGAGA, TGGGAGAG, TGGGAGG, TGGGAGGA, TGGGAGGC, TGGGAGGG, TTGGAAG, TTGGAAGG, TTGGGA, TTGGGAAG, TTGGGAG, TTGGGAGG

A.IE.7 0.12

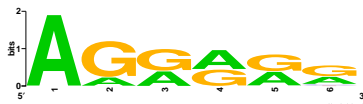

AAAAAAG, AAAAAAGA, AAAAAAGAG, AAAAGAAG, AAAAGAG,  
AAAAAGAGA, AAAGAAAAG, AAAGAAG, AAAGAGG, AAAGGAAG,  
AAAGGAG, AAGAAAAG, AAGAAAAGG, AAGAAGA, AAGAAGAA,  
AAGAAGC, AAGAAGG, AAGAAGGA, AAGAGAG, AAGAGAGA,  
AAGAGGA, AAGAGGAA, AAGAGGG, AAGGAAG, AAGGAAGG,  
AAGGAG, AAGGAGA, AAGGAGAA, AAGGAGAG, AAGGAGC,  
AAGGAGG, AAGGAAA, AAGGAAA, AAGGGAG, ACAGAGA,  
ACAGAGAA, ACAGAGAG, ACAGAGG, AGAAAAAG, AGAAAGG,  
AGAAAGGA, AGAAATGG, AGAAGA, AGAAGAA, AGAAGAAA,  
AGAAGAAG, AGAAGAGA, AGAAGAGG, AGAAGG, AGAAGGAG,  
AGAAGGG, AGAAGGGA, AGAGAAAA, AGAGAAAAG, AGAGAAAG,  
AGAGAAGG, AGAGACA, AGAGAG, AGAGAGA, AGAGAGAA,  
AGAGAGAG, AGAGAGG, AGAGAGGA, AGAGAGGG, AGAGGA,  
AGAGGAA, AGAGGAAA, AGAGGAAG, AGAGGAC, AGAGGAGA,  
AGAGGGG, AGAGGG, AGAGGGAG, AGAGGGC, AGAGGGG,  
AGGAAG, AGGAAGG, AGGAGA, AGGAGAA, AGGAGAAAG,  
AGGAGAT, AGGAGCA, AGGAGG, AGGAGGG, AGGAGGT,  
AGGAGGTG, AGGAGAAA, AGGAGG, AGGAGGA, AGGAGG,  
AGGGGAT, CAAGAAG, CAAGAGA, CAAGAGG, CAAGGAG,  
CAAGGGA, CAGAAAAA, CAGAAAG, CAGAAGA, CAGAAGG,  
CAGAGAA, CAGAGAAA, CAGAGAG, CAGAGAGA, CAGAGAGG,  
CAGAGGA, CAGAGGAA, CAGAGGG, CAGGAAG, CAGGAAGG,  
CAGGAGA, CAGGAGAA, CAGGAGG, CAGGAGGC, CAGGGAGA,  
CAGGGAGG, CAGGGGA, CCAGGAGA, CCAGGAGG, CCAGGGAG,  
CTAGAGA, GAAAGAGA, GAAGAAG, GAAGAAGA, GAAGAGA,  
GAAGAGAA, GAAGAGGA, GAAGGAAG, GAAGGAG, GAAGGAGA,  
GAAGGAGG, GAGAAAAG, GAGAAGA, GAGAAGAA, GAGAGAG,  
GAGAGAGG, GAGGAAG, GAGGAGA, GAGGAGAA, GAGGAGG,  
GAGGGAG, GAGGGAGA, GAGGGAGG, GCAGAGAG, GCAGAGGG,  
GCAGGAGA, GCAGGAGG, GCAGGGAG, GGAGGAGA, GTAGAAG,  
TAAGGGA, TAGAAGA, TAGAAGC, TAGAAGG, TAGAAGAA,  
TAGAGAG, TAGAGG, TAGAGGA, TAGAGGG, TAGGAAG,  
TAGGAG, TAGGAGA, TAGGAGG, TAGGGA, TAGGGAA,  
TAGGGAG, TAGGGAT, TAGGGG, TAGGGGA, TAGGGAGG,  
TTAAGGG, TTAGAGG, TTAGGAG, TTAGGG, TTAGGGA,  
TTAGGGG

A.IE.8 0.057

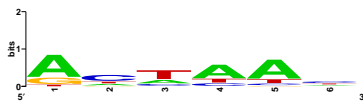

AAAACTAA, AAACTAAC, AAACTAAT, AAATTAAT, AACACTAA,  
AACTAAAA, AACTAAC, AACTAACA, AACTAAT, AACTAATG,  
AACTAATT, AACTTTTT, AATACTAA, AATACTGA, AACTTAAT,  
AATGCTAA, AATTAAC, AATTAACA, AATTAACT, ACAAAT,  
ACACTAA, ACACTAAT, ACACTCAC, ACTAAATT, ACTAAC,  
ACTAACA, ACTAACAT, ACTAAT, ACTAATAT, ACTAATC,  
ACTAATG, ACTAATGA, ACTAATGT, ACTAATT, ACTAATTA,  
ACTAATTT, ACTTACAT, AGACTAG, AGCTAAC, AGTAACC,  
ATAACTAA, ATACTAA, ATACTAAT, ATACTTAA, ATACTTT,  
ATATTAAC, ATCTAAC, ATGACTAA, ATGCTAA, ATGCTAAC,  
ATGCTAAT, ATGTTAAC, ATTAACAT, ATTAACC, ATTAACT,  
ATTAACTG, ATTAACTT, ATTAATCT, ATTAATGA, ATTAATTT,  
ATTACTAA, ATTCTAAC, ATTCTAAT, CAAAAAAA, CACTAAC,  
CACTAACA, CACTAAT, CACTAATG, CAGCTAC, CATACTAA,  
CATTAAC, CATTAACA, CATTAACT, CATTAATG, CCAAAAAA,  
CGCTAA, CTATTAAT, CTGCTAAC, CTGCTAAT, CTTACTAA,  
CTTCTAAC, CTTCTAAT, CTTGTAAAT, CTTTAACT, CTTTAATG,  
GAAACTAA, GAACTAA, GAACTAAT, GAAC TAG, GAAC TGG,  
GACTAAC, GACTAAT, GAGCTAG, GATTAAC, GCACTAA,  
GCTAATC, GCTAATGT, GGCTAAC, GTCTAAC, GTCTAAT,  
GTGCTAA, GTGCTAAC, GTGCTAAT, GTTAATAA, GTTACTAA,  
GTTCTAAT, GTTTTAAAC, TAAAAATAA, TAACTAAT, TAATAACT,  
TAATGCAT, TAATTAAC, TAATTAAT, TACTAAC, TACTAACA,  
TACTAAT, TACTAATG, TACTAATT, TAGCTAG, TATCTAAT,  
TATTAAC, TATTAACT, TATTAATT, TCAAAAAA, TCACTAA,  
TCACTAAC, TCACTAAT, TCAGTAAC, TCATTAAC, TCTTTAAC,  
TGAACTAA, TGACTAA, TGACTAAT, TGACTCTT, TGACTTGT,  
TGATTAAT, TGCTAAC, TGCTAAT, TGCTAATA, TGCTAATG,  
TGCTAATT, TGTCTAAC, TGTCTAAT, TGTTAATG, TGTTTAAAC,  
TTAACTAA, TTAATAA, TTAATCTA, TTAATTAC, TTACTAAA,  
TTACTAAC, TTACTAAT, TTATAACA, TTATTAAC, TTCTAAC,  
TTCTAAT, TTGCTAA, TTGCTAAC, TTGCTAAT, TTGTAAC,  
TTGTTAAC, TTTAACTA, TTTAATAT, TTTAATTT, TTACTTAA,  
TTTATTA, TTTCTAAC, TTTCTAAT, TTTTAAAC, TTTTAACT,  
TTTTAATA, TTTTAAAC

A.IE.9 0.043

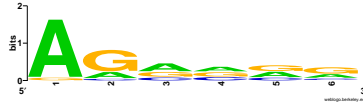

AAACAGG, AACCAGG, AACCCAGG, AAGACAG, AAGAGCA,  
AAGCAAG, AAGCAGA, AAGCAGG, AAGGCAG, AAGGGCA,  
ACACACAC, ACAGCCC, AGAAGCAG, AGACAGA, AGACAGG,  
AGACCAG, AGACGG, AGAGACAG, AGAGCAA, AGAGCAG,  
AGAGCCAG, AGAGGCAG, AGCAGAT, AGCAGGG, AGGACAG,  
CAACAAG, CAACAGA, CACACACA, CAGAGCAG, CAGCAGA,  
CTAGGCA, GAACAGG, GAAGCAG, GAAGCAGG, GACAGAG,  
GAGACAG, GAGAGCA, GAGCAAG, GAGCACA, GAGCAGGG,  
GAGCCACC, GAGCCAGG, GAGGCAG, GAGGCGG, GCAGGCAG,  
GGACAAG, GGAGCAG, GGAGCAGG, GGAGGCAG, ATACAGG,  
TACAGGG, TACCAGG, TAGAACA, TAGACAG, TAGAGGC,  
TAGCAAG, TAGCAGA, TAGCAGC, TAGGACA, TAGGCAG,  
TAGGCCA, TAGGGCA, TGACCGC, TGAGCCAC, TGAGGCAG,  
TTAGGCA

A.IE.10 0.032

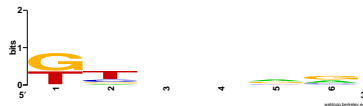

AATTCTAA, AGCCTAG, AGCTAGG, AGGCCTCA, AGGCTCAC,  
AGGCTGGG, AGTACAG, AGTAGCA, AGTCAGA, AGTCCAG,  
AGTCCCAG, AGTCTAG, AGTGCAG, AGTTCAG, ATACAGG,  
ATCCAGG, ATGCTCAC, ATGCTCAT, ATGTAGG, ATTACAG,  
ATTAGCA, ATTCTCAC, ATTGCAG, ATTGCTAA, ATTTGCCA,  
ATTGTAT, ATTTTAGA, CAGCTCAC, CATCTCAC, CATCTCAT,  
CCTGCAGA, CCTGCAGG, CCTTCTAA, CCTTCTGA, CGTTCTC,  
CTGCAGG, CTGCTCAC, CTGCTCAT, CTGTAGA, CTGTAGG,  
CTGTTCCAC, CTTCAGG, CTTCCAG, CTTCCCTAA, CTTCTCAC,  
CTTGCAG, CTTTAGA, CTTTAGG, GATTACAG, GCTGCAGG,  
GGCTCAC, GGGCTCAC, GGTAACAG, GGTCAGG, GGTCTCAC,  
GGTTGCA, GTACAGA, GTAGCAG, GTCAGGA, GTCAGGG,  
GTCCAGA, GTCTCAC, GTCTCATT, GTGCAGG, GTGCTCAC,  
GTGTCTAA, GTTCTCAC, GTTGCAG, GTTTCTAA, TACAGG,  
TATGCAG, TATGTAG, TATTCTAA, TCTCCAGG, TCTGTAG,  
TGCTAGG, TGCTCAC, TGGCCAGG, TGGCTCAC, TGGCTCAT,  
TGGTGCA, TGTACTCA, TGTACAG, TGTCTAA, TGTCTAA,  
TGTCTCAC, TGTCTCAT, TGTCTTAC, TGTGCTAA, TGTTCTAA,  
TTACAGG, TTCCAGA, TTCCAGG, TTCCTAG, TTCTAGG,  
TTGCAGG, TTGCCAG, TTGCTCAC, TTGGCAG, TTGTAGA,  
TTGTAGG, TTGTATT, TTGTATTT, TTGTCTAA, TTTAGAG,  
TTTAGGG, TTTCCAG, TTTCCCTAA, TTTCTGG, TTTGCTAA,  
TTTGAG, TTTGGAGA, TTTGGGA, TTTTAGG, TTTTCCAG,  
TTTTCTAA, TTTTGACC

A.IE.11 0.052

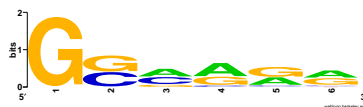

AGCAAAG, AGCAAGA, AGCAAGG, AGCAGAG, AGCAGAGA,  
AGCAGAGG, AGCAGCAG, AGCAGGA, AGCATAG, AGGCAAA,  
AGGCAAG, AGGCAGA, AGGCAGAG, AGGCAGG, AGGCAGGA,  
AGGGCAGG, AGGGGCAG, CAGCAGCA, CTGCAGAG, CTGCAGGA,  
CTGCAGGG, CTGCAGGT, CTGGGCAG, GAGGCAGA, GAGGCAGG,  
GAGGGCAG, GCAAAGA, GCAAAGG, GCAAGAA, GCAAGAG,  
GCAGAAG, GCAGAGA, GCAGAGG, GCAGGA, GCAGGAA,  
GCAGGAG, GCCAGAA, GCGAGA, GGAGCAA, GGCAAG,  
GGCAAGA, GGCAAGG, GGCAGA, GGCAGAA, GGCAGAG,  
GGCAGAG, GGCAGAGA, GGCAGAGG, GGCAGGA, GGCAGGAG,  
GGCATGG, GGCGAGG, GGCGGGG, GGGCAAG, GGGCAGAG,  
GGGCAGGG, GGGCCGGG, GGGCGGG, GGGCGGGG, GGGGCAA,  
GGGGCAGG, GGGGGCAG, TGCAAGG, TGCAGAG, TGCAGGA,  
TGCAGGG, TGCAGGTG, TGGAGCA, TGGAGCAG, TGGCAAG,  
TGGCAGA, TGGCAGAG, TGGGCAA, TGGGCAGG, TGGGGCAG,  
TTGGGCA

A.IE.12 0.19

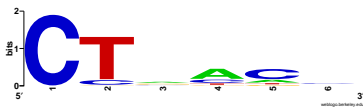

AACTAACT, ACCTCACC, ACCCTCTC, AGCCTGAC, ACCTAAC,  
ACCTCACC, ACCTCACT, ACCTGAC, ACCTGACC, ACCTGACT,  
ACTAACC, ACTAACCT, ACTAACG, ACTAACT, ACTAACTT,  
ACTCACC, ACTCACCC, ACTCACCT, ACTCACTC, ACTCTAAT,  
ACTCTGAC, ACTGAC, ACTGACAT, ACTGACC, ACTGACCA,  
ACTGACCC, ACTGACCT, ACTGAGG, ACTGACT, ACTGACTC,  
ACTGACTG, ACTGACTT, ACTGATC, ACTGATTT, AGCCCTC,  
AGCCTCAC, AGCCTGAC, AGCTCACC, AGCTCACT, AGCTCTGG,  
AGCTGACC, AGCTGACT, ATCCACC, ATCTAATG, CACCCCTC,  
CACCTCAC, CACCTGAC, CACTCAC, CACTCACC, CACTCACT,  
CACTCCAG, CACTGACA, CACTGACC, CACTGACT, CACTGATG,  
CACTGCAC, CCACTCAC, CCCAACCT, CCCACTCA, CCCCACTC,  
CCCCTACT, CCCCCCTC, CCCCTCA, CCCCTCAC, CCCCTGAC,  
CCCTAAC, CCCTAAC, CCCTCAC, CCCTCACA, CCCTCACC,  
CCCTCACT, CCCTCTCA, CCCTCTGA, CCCTGAC, CCCTGACA,  
CCCTGACC, CCCTGACT, CCCTGATC, CCCTGATG, CCTAAC,  
CCTAAC, CCTAAC, CCTAACCC, CCTAACG, CCTAACT,  
CCTAACTG, CCTAACTT, CCTAATC, CCTAATG, CCTCAC,  
CCTCACC, CCTCACCA, CCTCACCC, CCTCACCT, CCTCAGC,  
CCTCACT, CCTCACTC, CCTCACTG, CCTCACTT, CCTCCAA,  
CCTCCTAA, CCTCTAA, CCTCTAAC, CCTCTAAT, CCTCTCAC,  
CCTCTCAT, CCTCTGAC, CCTCTGAT, CCTGAC, CCTGACAC,  
CCTGACC, CCTGACCA, CCTGACCC, CCTGAGC, CCTGACT,  
CCTGACTC, CCTGACTG, CCTTGACC, CCTTGACT, CCTTTTTT,  
CGAACT, CGCTGACC, CTAAACTT, CTAAC, CTAACA, CTAACAC,  
CTAACAG, CTAACAT, CTAACATG, CTAACATT, CTAACC,  
CTAACCA, CTAACCAT, CTAACCC, CTAACCCT, CTAACCT,  
CTAACCTC, CTAACCTG, CTAACCTT, CTAACG, CTAACGC,  
CTAACGT, CTAAC, CTAAC, CTAAC, CTAAC, CTAAC, CTAAC,  
CTAACTGA, CTAAC, CTAAC, CTAAC, CTAAC, CTAAC, CTAAC,  
CTAATAT, CTAATCTT, CTAATG, CTAATGAT, CTAATGC,  
CTAATGCT, CTAATGT, CTAATGTG, CTAATGTT, CTAATCT,  
CTAATGTT, CTACAGG, CTACGA, CTCACACC, CTCACC,  
CTCACAC, CTCACCAT, CTCACCC, CTCACCCC, CTCACCTT,  
CTCACCG, CTCACCT, CTCACCTC, CTCACCTG, CTCACCTT,  
CTCACG, CTCACGC, CTCACGT, CTCACTC, CTCACTCA,  
CTGACTCC, CTCACTCT, CTCACTGC, CTCACTTG, CTCATGCC,  
CTCATGTG, CTCATGTT, CTCATTCC, CTCCTAAA, CTCCTGAG,  
CTCCTAAC, CTCCTCAC, CTCCTGAT, CTCCTAAT, CTCCTAAC,  
CTCTAAC, CTCTAAT, CTCTAAT, CTCTAATG, CTCTAATT,  
CTCTCAC, CTCTCAC, CTCTGAC, CTCTGACC, CTCTGACT,  
CTCTGATC, CTCTGATG, CTGAC, CTGACACC, CTGACCA,  
CTGACATC, CTGACATG, CTGACATT, CTGACC, CTGACCA,  
CTGACCAC, CTGACCAG, CTGACCAT, CTGACC, CTGACCA,  
CTGACCC, CTGACCCG, CTGACCCT, CTGACCG, CTGACCT,  
CTGACCTC, CTGACCTG, CTGACCTT, CTGACG, CTGACCG,  
CTGACGG, CTGACGT, CTGACTCA, CTGACTCT, CTGACTG,  
CTGACTGA, CTGACTGC, CTGACTGT, CTGACTTG, CTGACTTT,  
CTGATCCC, CTGATCTC, CTGATCTT, CTGATGCC, CTGATGCT,  
CTGATGTG, CTGATTCT, CTGACTC, CTGATTCA, CTGACTC,  
GACCCCTC, GACCTCTC, GACCTGAC, GACTGACC, GACTGACT,  
GCCCCCT, GCCCTCAC, GCCCTGAC, GCCTAAC, GCCTCAC,  
GCCTCACA, GCCTCAC, GCCTCACT, GCCTCTCA, GCCTCTGA,  
GCCTGAC, GCCTGACC, GCCTGACT, GCTAAC, GCTAACCA,  
GCTAAC, GCTAACG, GCTAACT, GCTCACAC, GCTCAC,  
GCTCACCC, GCTCACCT, GCTCACG, GCTCACT, GCTCACTC,  
GCTCACTG, GCTCACTT, GCTCATGT, GCTCTAA, GCTCTAAC,  
GCTCTGAC, GCTCTGAT, GCTGAC, GCTGACA, GCTGACAC,  
GCTGACAT, GCTGACC, GCTGACCA, GCTGACCC, GCTGACCT,  
GCTGACG, GCTGACT, GCTGACTC, GCTGACTG, GCTGACTT,  
GCTGATTT, GCTTACC, GGCTCAC, GGCTGAC, GGCTCACC,  
GGCTCACT, GGCTCATG, GGCTCTGA, GGCTGACC, GGCTGACT,  
GTCTCAC, GTCTGAC, GTCTCACC, GTCTCACT, GTCTGACC,  
GTCTGACT, TACTGAC, TACTGACT, TACTGAT, TACTGATG,  
TCACCCTC, TCCCACTC, TCCCCCCC, TCCCTAAC, TCCCTCAC,  
TCCCTGAC, TCCTAAC, TCCTAAC, TCCTAAC, TCCTAAC, TCCTAAC,  
TCCTAAT, TCCTAATG, TCCTAAT, TCCTCAC, TCCTCAC,  
TCCTCACT, TCCTCTAA, TCCTGAC, TCCTGACA, TCCTGACT,  
TCCTGATG, TCGAAC, TCTAAATG, TCTAAC, TCTAACCA,  
TCTAACAT, TCTAAC, TCTAACCA, TCTAACCC, TCTAACCT,  
TCTAACT, TCTAACTC, TCTAACTG, TCTAACTT, TCTAATA,  
TCTAATAA, TCTAATAT, TCTAATCT, TCTAATG, TCTAATGA,  
TCTAATGT, TCTAATTG, TCTCAC, TCTCACCA, TCTCACCC,  
TCTCACCT, TCTCACG, TCTCACTG, TCTCCTAA, TCTCCTAAC,  
TCTCTAAT, TCTCTGAC, TCTCTGAT, TCTGAC, TCTGACC,  
TCTGACCA, TCTGACCC, TCTGACCT, TCTGACG, TCTGACT,  
TCTGACTC, TCTGACTG, TCTGACTT, TCTGATGC, TCTGATT,  
TCTGATTG, TCTTAACT, TCTTACCT, TCTTGACT, TGACCCCT,  
TGACCCT, TGACCCTC, TGACCCTT, TGCCCTCAC, TGCCCTGAC,  
TGCTAAC, TGCTAAC, TGCTAACT, TGCTCAC, TGCTCACT,  
TGCTCATG, TGCTGACA, TGCTGACC, TGCTGACT, TGCTGATC

TTCTAAC, TTCCTAAT, TTCCTGAC, TTCTAACA, TTCTAACC,  
TTCTAACT, TTCTAATA, TTCTAATC, TTCTAATG, TTCTAATT,  
TTCTCACT, TTCTGACC, TTCTGACT, TTCTGATC, TTCTTAAC,  
TTCTTACC

A.IE.13 0.021

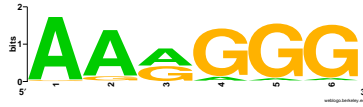

AAAAAAGG, AAAAAGGA, AAAAGGG, AAAGGG, AAAGGGA,  
AAAGGGAA, AAAGGGG, AAGGGG, AAGGGGA, AAGGGGG,  
AGAAAGGG, CAAAAGG, CAAAGGG, GAAAAGGA, GAAAGGG,  
GAAGGGG, GGAAGGGG

A.IE.14 0.048

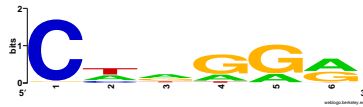

ACAAGGA, ACAAGGG, ACAGGGA, ACATAGG, ACCAAGG,  
ACCAGGA, ACTAGGA, ACTGGGA, AGCCAGGA, AGCTAGA,  
AGCTGGAG, AGCTGGGA, AGCTGGGG, CAAGGA, CAAGGAA,  
CACAGAGA, CAGGGAA, CAGGGAAG, CCAAGAA, CCAAGAG,  
CCAAGGA, CCAGGAG, CCAGGAGT, CCATAGA, CCATAGG,  
CCAAAAG, CCCAGCTA, CCCAGGAG, CCCAGGGA, CCCTAGA,  
CCTAGGA, CCTAGGG, CCTGGAGA, CCTGGAGG, CCTGGGAG,  
CCTGGGCA, CCTGGGG, CTAGAGG, CTAGGAA, CTAGGAG,  
CTAGGAT, CTAGGG, CTAGGGA, CTATAGA, CTGGGAA,  
CTGGGAAG, CTGGGAG, CTGGGATT, CTTGGAG, CTTGGGA,  
CTTGGGAG, CTTGGGG, GACAGAGA, GCAAGGA, GCAAGGG,  
GCACAGAG, GCAGGGA, GCATAGA, GCCAAGA, GCCAGGA,  
GCCAGGAG, GCCCAGAG, GCCCAGGA, GCCTGGAG, GCCTGGGG,  
GCTAGGA, GCTAGGG, GCTGGAGG, GCTGGGA, GCTGGGAT,  
GCTGGGGA, GCTGGGG, GCTTGGG, GGCAGGGA, GGCCGGGG,  
GGCTGGGA, TCAAGGG, TCAGGGG, TCCAAGA, TCCAAGG,  
TCCAGAG, TCCAGGA, TCCCAAAG, TCCAGAG, TCCAGGG,  
TCCCAGG, TCCTAGG, TCCTGGAG, TCCTGGGA, TCCTGGGG,  
TCTAGAG, TCTAGGG, TCTGGAG, TGCTGGGA, TTCCTAA

A.IE.15 0.12

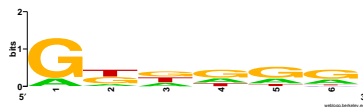

AAAGTGG, AAGGTAG, AAGTAGA, AAGTAGG, AAGTGGG,  
AGAGTAG, AGAGTGG, AGGGTAG, AGGGTGGG, AGGTAAG,  
AGGTAG, AGGTAGA, AGGTAGC, AGGTAGG, AGGTATG,  
AGGTGAG, AGGTCAGG, AGGTGGA, AGGTGGAG, AGGTGGG,  
AGGTGGGA, AGGTGGGG, AGGTTAG, AGGTTGC, AGGTTGG,  
AGTAGAA, AGTAGAG, AGTAGG, AGTAGGA, AGTAGGG,  
AGTATAG, AGTGAGG, AGTGGAG, AGTGGGA, AGTGGGG,  
AGTGTAG, AGTTGGA, AGTTGGG, CAAGTAG, CAGGGTA,  
CAGGTGGG, CGGGGTGG, CGGTGAC, CTGGGTGG, CTGGTGAC,  
CTGTGGGA, CTGTGTGG, GAAGTAG, GAAGTGG, GAGGTAG,  
GAGGTGG, GAGGTGGG, GAGGTTG, GAGTACA, GAGTAG,  
GAGTAGA, GAGTAGG, GAGTGGG, GAGTTGG, GCAGGTGG,  
GCAGTAG, GCAGTGAG, GGAGGTGG, GGAGTAG, GGAGTGG,  
GGGGGTGG, GGGGTGAC, GGGGTGGC, GGGGTGGG, GGGTAGG,  
GGGTAGG, GGGTGA, GGGTGGG, GGGTGGGG, GGGTGGGG,  
GGTTAG, GGTTGG, GGTAAGG, GGTAGAG, GGTAGG, GGTAGG,  
GGTAGGA, GGTAGGG, GGTAGGT, GGTATGG, GGTGAAG,  
GGTGACCT, GGTGAGGG, GGTGGAG, GGTGGAGG, GGTGGGA,  
GGTGGGAG, GGTGGGG, GGTGGGA, GGTGGGGG, GGTGGTGG,  
GGTGTGG, GGTTAAG, GGTTAGG, GGTTGGG, GGTTTAG,  
GTAAGGG, GTAGAG, GTAGAGA, GTAGAGC, GTAGAGG,  
GTAGGA, GTAGGAA, GTAGGAG, GTAGGCA, GTAGGG,  
GTAGGGA, GTAGGGG, GTAGGCCA, GTAGGGA, GTAGGGG,  
GTGGAGG, GTGGGA, GTGGGAG, GTGGGGA, GTGGGGG,  
GTGGGGGG, GTGGGTGG, GTGGTAG, GTGGTGG, GTGTAAAC,  
GTGTAATT, GTGTAGA, GTGTAGG, GTGTGGGG, GTTAGG,  
GTTAGGA, GTTGGAG, GTTGGGA, GTTGGGG, GTTGTAG,  
GTTTAATG, GTTTAGG, TAGGTGC, TAGGTGG, TAGTACA,  
TAGTAGA, TAGTGGG, TAGTTGG, TCGTAG, TGGGTGG,  
TGGGTGGG, TGGTAGA, TGGTAGG, TGTAGAG, TGTAGG,  
TGTAGGA, TGTAGGC, TGTAGGG, TGTAGGT, TGTGGGA,  
TGTGTAAC, TGTGTAG, TGTGTGGG, TGTAGG, TGTGACT,  
TGTTAAT, TTAGTAG, TTAGTGG, TTGGTAG

### 4.3 5'SS ESEs/ESSs

|        |       |  |                                                                                                                                                                                                                    |
|--------|-------|--|--------------------------------------------------------------------------------------------------------------------------------------------------------------------------------------------------------------------|
| D.EE.1 | 0.37  |  | ACGGGCG, AGGTGGTG, CCGCCGC, GCAGTGGG, GGCCGCG,<br>GGCGGAC, GGGCAGCT, GGGTGGG, GGTGACG, GGTGCG,<br>GGTGCGG, GGTGGGC, GGTGAC, TGGTGGGC                                                                               |
| D.EE.2 | 0.21  |  | ACTTCA, CTGGTCTC, GGTCTCCC, TGGTCTC, TGGTCTCA,<br>TGGTCTCC, TGGTCTCT, TTACTTA                                                                                                                                      |
| D.EE.3 | 0.086 |  | AACAGATT, CACATTA, CACCTTA, CACTGTGA, CTCACTGT,<br>CTCATTGT, TGCAATA                                                                                                                                               |
| D.EE.4 | 0.076 |  | AAATATTT, ACTATTT, ATAAACT, CTAATTT                                                                                                                                                                                |
| D.EE.5 | 0.26  |  | AAGAAGGT, ATGAACG, ATGAGCTG, CTGACCCT, CTGACTGT,<br>GAAGGAGG, GACCCTGC, GAGCGCC, GATGGAGG, GGACCCT,<br>GGACCCTG, GGGCCTG, GGTGAGG, GTGACGG, GTGAGCC,<br>GTGGCGG, TGACGGG, TGAGCGG, TGGACCCT, TGGATCCT,<br>TGTGGTGG |

## 4.4 3'SS ESEs/ESSs

A.EE.1 0.14

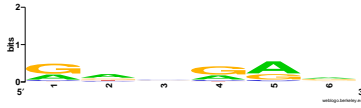

AACGAAT, AACGAATG, AACGAGT, AACGAGTG, AATGAATG, AATGAGTG, AGTGACCT, ATTTTGGGA, CAGTGACC, CCCGTGAG, CCGTGAGC, CGACGAGT, CGATGAGT, CGTGAGCT, GACGAAT, GACGAATG, GACGAGT, GACGAGTG, GAGGGAGA, GATGAATG, GATGAGT, GATGAGTG, GGACGAGT, GGATGAAT, GGATGAGT, GGTCATCA, GGTGACAT, GTCATCAC, TAAATGAA, TAGATGAA, TCAGTGAC, TCGACGA, TCGACGAG, TCGATGAG, TCGGTGA, TGACGAGT, TGATGAAT, TGATGAGT, TGGATCCT, TTGACGA, TTGACGAG, TTGATGAA, TTGATGAG, TTGGTGAC

A.EE.2 0.22

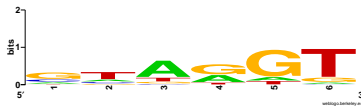

ACAGGTA, CCAGGTA, GTAAGT, TACAGGT, TCAGTGTT, TCCACAGG, TGTACAAA, TTCCAGAG

A.EE.3 0.47

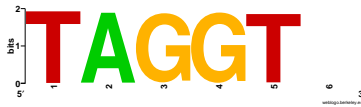

CTAGGT, TAGGT, TAGGTA, TAGGTC, TAGGTT

A.EE.4 0.12

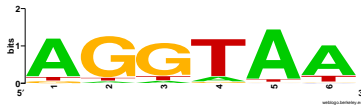

AGGTAA, AGGTCATC, CAGGTAT, TGTTTAA, TTTATAA, TTTTTCAG

A.EE.5 0.055

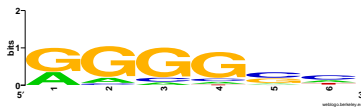

AGGGCTA, GACCCTGC, GACCCTTC, GAGGCCCT, GAGGGGC, GGACCCCG, GGACCCTG, GGGGCAA, GGGGCCCC, GGGGGGC, TGGACCCT, TGGACTCT

## 5 Primates found elements

### 5.1 5'SS ISEs/ISSs

AATACAA, ACACACA, ACTTTGG, AGCACTT, AGGCTGA, AGGTA, AGGTAA, AGGTAG, AGGTCA, AGGTCAG, AGTGCAG, ATATTTT, CAGGAGT, CAGGGGC, CAGGTA, CCCCCAC, CCCCCACC, CCCCCG, CCGCCCC, CCGGGG, CCCTGGGG, CCGCCC, CCGCCCC, CCGCG, CCGGA, CCGGG, CCGGGC, CCTGCCCC, CCTGGGGC, CCTGTA, CCTGTAA, CGGGCC, CGGGG, CGGGGC, CGGGGCC, CTCCTG, CTGGGCAG, CTGGGCC, CTGGGCC, CTGGGGC, CTGGGGCC, CTGGGGCT, CTGTAAT, CTGTAG, CTTTGGGA, GAGACCA, GCAGGGA, GCCCCG, GCCGC, GCCGCC, GCCGGG, GCCTGGG, GCGCCC, GCGGCC, GCGGG, GCGGGC, GCTGGG, GGCAGG, GGCCTGG,



GGCTCAC, GGGCAGGG, GGGCCC, GGGCCCC, GGGCCG, GGGCCTGG, GGGCGG, GGGCGGG, GGGCTGGG, GGGGCAGG, GGGGCCC, GGGGCGG, GGGGCTG, GGGGCTGG, GGGGTCC, GGGGTGG, GGGGTGGG, GGGTGGGG, GTAAGT, GTAGGT, GTGCAGT, GTGGGGG, TAATCC, TAGCTGG, TGCAGTG, TGGCTCA, TGGGAGGC, TGGGCC, TGGGGAGG, TGGGGCC, TGTAATC, TTGAGAC, TTGGGAGG, TTTGAGA, TTTTAAA, TTTTTTA

## 5.2 5'SS ESEs/ESSs

ACATTTT, CTGGTCT, GGACCCT, GGACCCTG, TGGTCTC

## 5.3 3'SS ISEs/ISSs

AAAAAAA, AAAAAAAA, AAAAAAG, AAAGGG, AACTAAT, AAGGGA, ACACACA, ACAGAG, ACTAAC, ACTAAT, ACTAATT, ACTGAC, ACTGACC, AGAAGA, AGAAGG, AGACAG, AGACG, AGAGAG, AGAGGA, AGATAG, AGCTAC, AGCTGGG, AGGAAG, AGGAGA, AGGAGAA, AGGAGG, AGGCAGG, AGGCG, AGGCTGG, AGGTGG, AGTAAC, AGTAGA, ATTAAC, ATTAATG, ATTACAG, CAAAAAA, CAAAGTG, CACTGAC, CACTGCA, CAGGAG, CAGGAGA, CAGGAGG, CAGTGAG, CCACTGA, CCAGCTA, CCAGGAG, CCCAAAG, CCCAGGA, CCCCTGA, CCCTCAC, CCCTGAC, CCTAAC, CCTCAC, CCTCACC, CCTCACT, CCTGGGA, CGAGA, CTAAC, CTAACA, CTAACC, CTAACT, CTAATC, CTCACC, CTCACCC, CTCACCT, CTCATGT, CTCCTAA, CTCTGAC, CTCTGACC, CTCTGAT, CTGACC, CTGACCA, CTGACCC, CTGACTG, CTGGGA, CTGGGAT, CTGGGCA, CTTTTTTT, GAAAGG, GAAGGA, GAAGGT, GAGAAG, GAGGAG, GAGGAGG, GAGGCA, GAGGCAG, GATTACA, GCAAGA, GCAGGAG, GCCTCAC, GCCTGAC, GCTAAC, GCTCAC, GCTCACC, GCTGAC, GCTGACC, GCTGACT, GCTGGGA, GGAAG, GGAAGG, GGAGAA, GGAGCA, GGAGG, GGAGGA, GGAGGCT, GGAGGG, GGCAGA, GGCAGGA, GGCTGAC, GGGAA, GGGAGG, GGGAGGC, GGGAGGG, GGGCAGGG, GGGCTGGG, GGGGAA, GTAGAG, GTAGG, GTAGGA, GTGAGC, GTGAGCC, GTGCTGG, GTGGGA, TACAGG, TACTAAT, TAGAAG, TAGAGA, TAGGAG, TAGGCA, TAGGGA, TAGGGG, TCCTCAC, TCTAAC, TCTAACT, TCTAAT, TCTCACC, TCTGAC, TCTGACC, TCTGACT, TCTGATT, TGACCCT, TGAGGCA, TGCTAAT, TGCTCAC, TGCTGAC, TGGGAG, TGGGAGG, TTACAGG, TTAATAA, TTCTAAT, TTCTCAC, TTCTGAC, TTGGAG, TTGGGA, TTGTAAT, TTTCTAA, TTTCTAAT

## 5.4 3'SS ESEs/ESSs

AATGAATG, GACGAGT, GATGAAT, GATGAATG, GATGAGTG, GCTGCTGC, GGGCCCT, TAGGT, TGATGAAT, TTGATGAA

# 6 Outgroup found elements

## 6.1 5'SS ISEs/ISSs

AAGGTA, ACACACA, ACTTATT, AGAGAGA, AGCGGG, AGGGAGGG, AGGGTA, AGGTA, AGGTAA, AGGTAG, AGGTAT, AGGTCA,

AGGTGA, AGTAAG, ATTATTT, ATTTAA, ATTTTAT, ATTTTTC, ATTTTCT, CACACAC, CAGGTA, CATTTA, CCCGGC, CCCGGG, CCCGGGG, CCGCCG, CCGCG, CCGGCC, CCGGGG, CCGGGGG, CGGCC, CGGCCG, CGGGG, CGGGG, GAAGGT, GAGGT, GAGGTA, GCACTGT, GCCGC, GCCGCC, GCCGGG, GCCGGGG, GCGGCC, GCGGGC, GCTGGC, GGCCG, GGCCGG, GGCTGG, GGGAGG, GGGAGGG, GGGCCG, GGGCCGG, GGGCGG, GGGGAGG, GGGGCC, GGGGCCG, GGGGCG, GGGGCGG, GGGGGC, GGGGGC, GGGTGG, GGTAAG, GGTGAG, GTAAG, GTAAGG, GTAAGT, GTGAG, GTGAGT, GTGGGG, TAGCAC, TAGGTA, TCTTTT, TGGGGG, TGTAAG, TTAGGT, TTCCAT, TTTATTT, TTTATTTT, TTTCTTT, TTTTAT, TTTTATT, TTTTCTT, TTTTCT, TTTTTT, TTTTTA, TTTTTC, TTTTTTT, TTTTTTTT

## 6.2 5'SS ESEs/ESSs

ACATTTT, ACGGTG, CCAACAA, GACCCTG, GACCCTGC, GGACCCT, GGACCCTG, GGTGAG, GTGGCCT, TGAGCG, TGGACCC, TGGACCCT

## 6.3 3'SS ISEs/ISSs

AAAAAGA, AAATAA, AAAGGG, AACTAAT, AACTGAT, AAGAGA, AAGAGG, AAGGAAG, AAGGAG, AAGGGA, AAGGGC, AAGGGG, AATAATTT, AATTAAC, AATTTTAA, ACAGAG, ACAGGA, ACAGGG, ACTAAC, ACTAAT, ACTAATA, ACTAATG, ACTAATT, ACTGAC, ACTGACT, ACTGATT, ACTTTTTT, AGAAAG, AGAACA, AGAAGA, AGAAGG, AGACAG, AGAGAA, AGAGAAA, AGAGAAG, AGAGAG, AGAGAGA, AGAGCA, AGAGG, AGAGGA, AGAGGG, AGATAG, AGATGG, AGCAGA, AGCAGC, AGCCAG, AGGAAG, AGGAG, AGGAGA, AGGAGC, AGGAGG, AGGCAC, AGGCAG, AGGCCA, AGGGA, AGGGAA, AGGGAC, AGGGAG, AGGGAT, AGGGCA, AGGGGA, AGGGGG, AGGTAG, AGGTGG, AGTAGA, AGTGGA, ATAACTA, ATAATCA, ATACTAA, ATATTA, ATATTAAT, ATCTAAT, ATCTGG, ATGCTAA, ATGGGA, ATGGGG, ATGTTTTT, ATTAAC, ATTAAC, ATTAATG, ATTAATT, ATCTAA, ATTGGG, ATTTAAC, ATTTTAA, ATTTAAT, CAAGAG, CAAGGA, CACAGG, CACTAA, CACTGAC, CAGAAG, CAGAGA, CAGAGG, CAGCAG, CAGGAA, CAGGAG, CAGGCA, CAGGGA, CAGGGG, CATTAAC, CCAGC, CCAGGA, CCCAGG, CCCCTC, CCTCAC, CCGCC, CCTAAC, CTAGA, CCTCACT, CCTGACC, CCTGGG, CTAAC, CTAACA, CTAACAT, CTAACC, CTAACT, CTAACTT, CTAATC, CTAATG, CTAATGA, CTAATGT, CTAATT, CTAGAG, CTAGG, CTCACC, CTCACCT, CTCTCTCT, CTCTGAC, CTCTGAT, CTGACC, CTGACCC, CTGACCT, CTGACTT, CTGGAG, CTGGGA, CTTCTAA, CTTGGG, CTTTTTTT, GAAAGG, GAAGAG, GAAGG, GAAGGA, GAAGGC, GAAGGG, GACAGG, GACTAA, GAGAAG, GAGAGA, GAGAGAG, GAGAGG, GAGCAG, GAGGA, GAGGAA, GAGGAG, GAGGCA, GAGGG, GAGGGA, GAGGGC, GAGGGG, GACTGG, GATTAAT, GATTAG, GCAAAG, GCAAGG, GCACAG, GCAGAG, GCAGGA, GCAGGG, GCCAGG, GCCTGG, GCTAAC, GCTGAC, GCTGACC, GCTGGA, GCTTGG, GGAAAG, GGAACA, GGAAG, GGAAGA, GGAAGC, GGAAGG, GGACAG, GGAGA, GGAGAA, GGAGAG, GGAGAT, GGAGG, GGAGGA, GGAGGC, GGAGGG, GGATGG, GGCAAG, GGCACA, GGCAGA, GGCAGG, GGCCAG, GGCTGG, GGGAAG, GGGACA, GGGAG, GGGAGA, GGGAGG, GGGCAA, GGGCAG, GGGGA, GGGGAA, GGGGAG, GGGGCA, GGGGG, GGGGA, GGGGGG, GGGTGG, GGTAAG, GGTCAG, GGTGAG, GGTGGA, GGTGGG, GGTGG, GTAAGG, GTAGG, GTAGGA, GTCAGG, GTCCAG, GTCGG, GTGAGG, GTGGAG, GTGGGG, GTTAAC, GTTGGG, TAACATT, TAACCT, TAACCTT, TAATAA, TAACTTT, TAAGGG, TAATAAC, TAATTA, TAATTTT, TACTAAT, TACTGAT, TAGAG, TAGAGA, TAGAGG, TAGCAG, TAGGAG, TAGGCA, TAGGG, TAGGGA, TATTAAC, TATTAAT, TATTTTAA, TCACTGA, TCCAGA, TCCAGG, TCCTAA, TCCTAAT, TCCTAG, TCTAAC, TCTAACA, TCTAACT, TCTAAT, TCTAATG, TCTAATT, TCTCAC, TCTCACC, TCTCACT, TCTGAC, TCTGACC, TCTGATT, TCTTTTCT, TCTTTTTT, TGACCCT, TGAAGG, TGATTA, TGCAGA, TGCAGG, TGCTAA, TGCTAAA, TGCTAAT, TGCTGAC, TGGAAG, TGGAGA, TGGAGG, TGGCAG, TGGGAA, TGGGAG, TGGGCA, TGGGGA, TGGGGG, TGGTAG, TGTAAC, TGTAAC, TGTAGG, TGTATA, TGTCTAA, TGTCTGA, TGTGACT, TGTTAAT, TTAACAT, TTAACCT, TTAGAG, TTAGGA, TTATTA, TTCTAAC, TTCTAAT, TTCTCAC, TTCTGAC, TTCTTAC, TTGCAG, TTGCTAA, TTGGAG, TTGGGA, TTGTAAT,

TTTAACT, TTAAATC, TTTAATT, TTTAATTT, TTTACTA, TTTAGG, TTTCTAA, TTTTAAAC, TTTTAAT, TTTTAATG, TTTTAATT, TTTTCTCT,  
TTTTGTTT, TTTTAAAC, TTTTAAAT, TTTTCTCT

## 6.4 3'SS ESEs/ESSs

AATGAATG, CAGGTA, CATCACA, CCCGTG, CCCGTGA, CCGTGAG, CGTGAG, CGTGAGC, GACCCTG, GACCCTGC, GATGAAT, GATGAATG,  
GATGAGT, GATGAGTG, GGACCCT, GGACCCTG, TAGATGA, TAGGT, TGATGAAT, TGGACCC, TGGACCCT, TTGATGA, TTGATGAA,  
TTTACAG

# 7 Novel elements

## 7.1 5'SS ISEs

ACCGCG, ACGGGC, AGGGCCG, CAGGGCCG, CCAGGGC, CCAGGGC, CCCCCG, CCCCCG, CCCCCG, CCCCCG, CCCCCG, CCCCCG,  
CCCCGG, CCCCCGG, CCCCCGG, CCGCG, CCGCG, CCGCG, CCGCTT, CCGGCC, CCGGCC, CCGGGC, CCGGG,  
CCCGGG, CCGGGCA, CCGGGCC, CCGGGG, CCGGGG, CCCTCCG, CCGCG, CCGCG, CCGCG, CCGCG,  
CCGGCC, CCGCG, CCGCG, CCGGGC, CCGGG, CCGGAG, CCGGC, CCGGCC, CCGGCC, CCGGCC, CCGGCC, CCGGCC,  
CCGGC, CCGGG,  
CCTCCCC, CGCCCC,  
CGCCCC, CGCCCC, CGCCCC, CGCCCC, CGCCCC, CGCCCC, CGCCCC, CGCCCC, CGCCCC, CGCCCC,  
CGGGC, CGGGCC, CGGGCC, CGGGCC, CGGGC, CGGGC, CGGGC, CGGGC, CGGGC, CGGGC, CGGGC, CGGGC,  
GCAGGGC, GCCCC,  
GCCCC, GCCCC, GCCCC, GCCCC, GCCCC, GCCCC, GCCCC, GCCCC, GCCCC, GCCCC, GCCCC, GCCCC,  
GCCCC, GCCCC, GCCCC, GCCCC, GCCCC, GCCCC, GCCCC, GCCCC, GCCCC, GCCCC, GCCCC, GCCCC,  
GCGCCT, GCGCG,  
GCTCGG, GGCCCC,  
GGCCCC, GGCCCC, GGCCCC, GGCCCC, GGCCCC, GGCCCC, GGCCCC, GGCCCC, GGCCCC, GGCCCC,  
GGCCCC, GGCCCC, GGCCCC, GGCCCC, GGCCCC, GGCCCC, GGCCCC, GGCCCC, GGCCCC, GGCCCC,  
GGCCCC, GGCCCC, GGCCCC, GGCCCC, GGCCCC, GGCCCC, GGCCCC, GGCCCC, GGCCCC, GGCCCC

## 7.2 5'SS ISSs

AAGTAAG, AATCCCAG, ACAGGTA, AGAGGTA, AGGTCAG, AGGTCAG, CAGATAG, CAGGTAC, CCAGGTA, CCTGTAA, CCGTGAG,  
CTATCTA, GAGGTA, GAGGTCAG, GCAGGTA, GCAGGTG, GGCAGGT, GGTGAGT, GGTGAGC, GGTAAAG, GGTCAA, GTAATCC,  
TAAGCG, TAATCCC, TAATCCA, TAGATAG, TAGTAAG, TCAGGTA, TGAGGTA

### 7.3 5'SS ESEs

ATAAACT, CTCACTGT, GGTCTCCC

### 7.4 5'SS ESSs

CCGCCGC, GGCCGCG, GGTGACG, GGTGCG, GTGACGG, GTGAGCC, TGACGGG

### 7.5 3'SS ISEs

AATAACAT, ACGCTGA, ACTAAT, ACTAATC, AGCTCACT, AGGCCTCA, ATAACATT, ATGCTCAC, ATGCTCAT, ATTAACC, ATTCTCAC, CATTAAAC, CCCACTCA, CCCTCTCA, CCGCTCA, CCTCTCAC, CCTCTCAT, CGCTAA, CGCTCAC, CGGTGAC, CTAACAT, CTAACATT, CTAACG, CTAACGC, CTAACGT, CTAATC, CTAATCG, CTAATCT, CTAATCTT, CTCACACC, CTCACG, CTCACGC, CTCACGT, CTCACTC, CTCACTCA, CTCACTCC, CTCACTCT, CTCACTGC, CTCACTTG, CTCGCTC, CTCTCAC, CTGACACT, CTGACTCT, CTTATTCA, GCCGCTC, GCCTCTCA, GCGCTGA, GCTAATC, GCTCACAC, GCTCACG, GCTCACT, GCTCACTC, GCTCACTG, GCTCACTT, GGCACCTA, GGCTCAC, GGCTCACT, GGTCTCAC, GTAACATT, GTCTAAT, GTCTCAC, GTCTCACT, GTGCTCAC, GTTCTCAC, TAACCATT, TAACGC, TAACGT, TAACGTT, TAATCATT, TCACGCT, TCACTCAT, TCACTCTC, TCCACTCA, TCCCCTC, TCTAATCT, TCTCACG, TCTCACTG, TGACGCC, TGACGCT, TGACTCTT, TGCTCAC, TGCTCACT, TGGCTCAC, TGGCTCAT, TGTCTAAT, TTCTCACT

### 7.6 3'SS ISSs

AAGGCAG, AATAGGA, ACAGGGA, ACATAGG, AGAGCCAG, AGAGGGC, AGAGTAG, AGGATAG, AGGCAAA, AGGCAGA, AGGCAGG, AGTCCCAG, ATACAGG, ATAGGAA, ATAGGAG, ATAGGCA, ATCCACC, ATTAGCA, CAAAGGG, CACTCCAG, CAGATAG, CAGGGAA, CAGGGGA, CATAGGA, CCATAGA, CCATAGG, CCCCAGG, CCCGGCC, CCTAGGA, CCTCCCAA, CTAGGAA, CTAGGAG, CTAGGAT, CTAGGCA, CTATAGA, CTGCACTC, CTTCCCAG, GAAGGCA, GAGGCAG, GAGGCAGA, GAGGCAGG, GAGGCGG, GATAAGG, GCAAAGG, GCAGTAG, GCATAGA, GCATTAG, GCTAGGA, GGAAGGG, GGAATAG, GGATCG, GGCAGGGA, GGCGAGG, GGGGCAA, GGTACAG, GGTCAGG, GGTAAAG, GTAGAGA, GTAGAGC, GTAGAGG, GTAGCAG, GTAGGCA, GTCAGGG, GTGAGCCA, TACAGG, TACAGGC, TACAGGG, TAGAGGG, TAGATAG, TAGGCAG, TAGGGAA, TAGGGAT, TAGGTGC, TATTAGC, TCAGGGG, TCCTAGG, TCGAAC, TGCTAGG, TTAAGGG, TTAGAGG, TTAGGAG, TTCCTAG, TTCGGA, TTGCCAG, TTCCCAG

### 7.7 3'SS ESEs

ACAGGTA, CCAGGTA, GGTGACAT, TACAGGT, TCCACAGG, TCGGTGA

## 7.8 3'SS ESSs

GGGGCAA

## 8 Statistical significance of the elements found

Table 5: Statistical significance of the elements found

| Element         | Count next to SS | Background count | Chi-square test         | LOD  |
|-----------------|------------------|------------------|-------------------------|------|
| <b>3'SS ESE</b> |                  |                  |                         |      |
| AACGAAT         | 87               | 16               | $1.72 \times 10^{-70}$  | 2.44 |
| AACGAATG        | 67               | 6                | $6.87 \times 10^{-137}$ | 3.48 |
| AACGAGT         | 115              | 29               | $2.07 \times 10^{-57}$  | 1.99 |
| AACGAGTG        | 93               | 5                | 0.00                    | 4.22 |
| AATGAATG        | 127              | 23               | $2.81 \times 10^{-104}$ | 2.47 |
| AATGAGTG        | 118              | 20               | $1.93 \times 10^{-106}$ | 2.56 |
| ACAGGTA         | 68               | 19               | $2.55 \times 10^{-29}$  | 1.84 |
| AGGTAA          | 120              | 37               | $2.16 \times 10^{-42}$  | 1.70 |
| AGTGACCT        | 76               | 19               | $4.47 \times 10^{-39}$  | 2.00 |
| ATTTTGGA        | 109              | 35               | $6.72 \times 10^{-36}$  | 1.64 |
| CAGGTAT         | 67               | 12               | $9.12 \times 10^{-57}$  | 2.48 |
| CAGTGACC        | 91               | 28               | $1.10 \times 10^{-32}$  | 1.70 |
| CCAGGTA         | 88               | 20               | $3.26 \times 10^{-52}$  | 2.14 |
| CCCGTGAG        | 64               | 11               | $1.76 \times 10^{-57}$  | 2.54 |
| CCGTGAGC        | 68               | 14               | $3.25 \times 10^{-47}$  | 2.28 |
| CGACGAGT        | 66               | 5                | $7.31 \times 10^{-164}$ | 3.72 |
| CGATGAGT        | 66               | 14               | $6.55 \times 10^{-44}$  | 2.24 |
| CGTGAGCT        | 77               | 10               | $1.25 \times 10^{-99}$  | 2.94 |
| CTAGGT          | 102              | 24               | $4.48 \times 10^{-57}$  | 2.09 |
| GACGAAT         | 107              | 23               | $1.10 \times 10^{-68}$  | 2.22 |
| GACGAATG        | 89               | 4                | 0.00                    | 4.48 |
| GACGAGT         | 185              | 39               | $7.01 \times 10^{-121}$ | 2.25 |
| GACGAGTG        | 163              | 15               | 0.00                    | 3.44 |
| GATGAATG        | 184              | 26               | $8.19 \times 10^{-211}$ | 2.82 |
| GATGAGT         | 248              | 79               | $1.30 \times 10^{-80}$  | 1.65 |
| GATGAGTG        | 194              | 23               | $1.89 \times 10^{-278}$ | 3.08 |
| GGACGAGT        | 85               | 15               | $5.11 \times 10^{-73}$  | 2.50 |
| GGATGAAT        | 82               | 18               | $2.03 \times 10^{-51}$  | 2.19 |
| GGATGAGT        | 83               | 17               | $1.13 \times 10^{-57}$  | 2.29 |

Continued on next page...

Table 5 – continued from previous page

| Element          | Count next to SS | Background count | Chi-square test         | LOD   |
|------------------|------------------|------------------|-------------------------|-------|
| GGTGACAT         | 74               | 14               | $7.19 \times 10^{-58}$  | 2.40  |
| GTAAGT           | 92               | 28               | $1.12 \times 10^{-33}$  | 1.72  |
| TAAATGAA         | 76               | 25               | $1.98 \times 10^{-24}$  | 1.60  |
| TACAGGT          | 74               | 14               | $7.19 \times 10^{-58}$  | 2.40  |
| TAGATGAA         | 68               | 13               | $1.54 \times 10^{-52}$  | 2.39  |
| TAGGT            | 353              | 108              | $6.85 \times 10^{-123}$ | 1.71  |
| TAGGTA           | 64               | 8                | $3.04 \times 10^{-87}$  | 3.00  |
| TAGGTC           | 115              | 35               | $1.15 \times 10^{-41}$  | 1.72  |
| TAGGTT           | 87               | 21               | $4.99 \times 10^{-47}$  | 2.05  |
| TCAGTGAC         | 86               | 27               | $7.03 \times 10^{-30}$  | 1.67  |
| TCAGTGGT         | 77               | 21               | $2.42 \times 10^{-34}$  | 1.87  |
| TCCACAGG         | 64               | 21               | $6.39 \times 10^{-21}$  | 1.61  |
| TCGACGA          | 95               | 24               | $1.34 \times 10^{-47}$  | 1.98  |
| TCGACGAG         | 64               | 6                | $6.02 \times 10^{-124}$ | 3.42  |
| TCGATGAG         | 68               | 11               | $3.37 \times 10^{-66}$  | 2.63  |
| TCGGTGA          | 71               | 22               | $1.51 \times 10^{-25}$  | 1.69  |
| TGACGAGT         | 64               | 6                | $6.02 \times 10^{-124}$ | 3.42  |
| TGATGAAT         | 143              | 25               | $3.84 \times 10^{-123}$ | 2.52  |
| TGATGAGT         | 120              | 29               | $4.62 \times 10^{-64}$  | 2.05  |
| TGTACAAA         | 68               | 20               | $7.11 \times 10^{-27}$  | 1.77  |
| TGTTTAA          | 106              | 33               | $5.35 \times 10^{-37}$  | 1.68  |
| TTCCAGAG         | 83               | 26               | $5.19 \times 10^{-29}$  | 1.67  |
| TTGACGA          | 117              | 31               | $8.01 \times 10^{-54}$  | 1.92  |
| TTGACGAG         | 64               | 14               | $9.93 \times 10^{-41}$  | 2.19  |
| TTGATGAA         | 164              | 45               | $2.07 \times 10^{-70}$  | 1.87  |
| TTGATGAG         | 125              | 40               | $3.53 \times 10^{-41}$  | 1.64  |
| TTGGTGAC         | 69               | 11               | $1.78 \times 10^{-68}$  | 2.65  |
| TTTATAA          | 80               | 25               | $3.82 \times 10^{-28}$  | 1.68  |
| TTTTTCAG         | 64               | 16               | $3.55 \times 10^{-33}$  | 2.00  |
| <b>3'/SS ESS</b> |                  |                  |                         |       |
| AGGGCTA          | 21               | 69               | $7.53 \times 10^{-09}$  | -1.72 |
| AGGTCATC         | 20               | 71               | $1.42 \times 10^{-09}$  | -1.83 |
| GACCCTGC         | 29               | 169              | $4.79 \times 10^{-27}$  | -2.54 |
| GACCCTTC         | 19               | 63               | $2.96 \times 10^{-08}$  | -1.73 |
| GAGGCCTT         | 17               | 63               | $6.81 \times 10^{-09}$  | -1.89 |
| GAGGGAGA         | 26               | 78               | $3.91 \times 10^{-09}$  | -1.58 |
| GAGGGGC          | 33               | 107              | $8.43 \times 10^{-13}$  | -1.70 |
| GGACCCCG         | 21               | 64               | $7.66 \times 10^{-08}$  | -1.61 |
| GGACCCTG         | 44               | 186              | $2.18 \times 10^{-25}$  | -2.08 |
| GGGGCAA          | 24               | 73               | $9.75 \times 10^{-09}$  | -1.60 |
| GGGGCCCC         | 22               | 67               | $3.85 \times 10^{-08}$  | -1.61 |
| GGGGGGC          | 18               | 63               | $1.43 \times 10^{-08}$  | -1.81 |

Continued on next page...

Table 5 – continued from previous page

| Element         | Count next to SS | Background count | Chi-square test         | LOD   |
|-----------------|------------------|------------------|-------------------------|-------|
| GGTCATCA        | 23               | 73               | $4.85 \times 10^{-09}$  | -1.67 |
| GTCATCAC        | 18               | 65               | $5.55 \times 10^{-09}$  | -1.85 |
| TGGACCCT        | 34               | 169              | $2.90 \times 10^{-25}$  | -2.31 |
| TGGACTCT        | 23               | 76               | $1.20 \times 10^{-09}$  | -1.72 |
| TGGATCCT        | 25               | 76               | $4.91 \times 10^{-09}$  | -1.60 |
| <b>5'SS ESE</b> |                  |                  |                         |       |
| AAATATTT        | 77               | 25               | $2.48 \times 10^{-25}$  | 1.62  |
| AACAGATT        | 66               | 19               | $4.16 \times 10^{-27}$  | 1.80  |
| ACTATTT         | 83               | 26               | $5.19 \times 10^{-29}$  | 1.67  |
| ACTTCA          | 65               | 18               | $1.60 \times 10^{-28}$  | 1.85  |
| ATAAACT         | 94               | 23               | $1.37 \times 10^{-49}$  | 2.03  |
| CACATTA         | 71               | 21               | $1.02 \times 10^{-27}$  | 1.76  |
| CACCTTA         | 95               | 29               | $1.56 \times 10^{-34}$  | 1.71  |
| CACTGTGA        | 107              | 27               | $1.74 \times 10^{-53}$  | 1.99  |
| CTAATTT         | 76               | 23               | $2.16 \times 10^{-28}$  | 1.72  |
| CTCACTGT        | 95               | 21               | $1.17 \times 10^{-58}$  | 2.18  |
| CTCATTGT        | 64               | 12               | $6.21 \times 10^{-51}$  | 2.42  |
| CTGACTGT        | 69               | 21               | $1.13 \times 10^{-25}$  | 1.72  |
| CTGGTCTC        | 120              | 20               | $9.49 \times 10^{-111}$ | 2.58  |
| GGTCTCCC        | 65               | 18               | $1.60 \times 10^{-28}$  | 1.85  |
| TGCAATA         | 74               | 24               | $1.86 \times 10^{-24}$  | 1.62  |
| TGGTCTC         | 220              | 64               | $1.09 \times 10^{-84}$  | 1.78  |
| TGGTCTCA        | 72               | 15               | $4.99 \times 10^{-49}$  | 2.26  |
| TGGTCTCC        | 78               | 24               | $2.97 \times 10^{-28}$  | 1.70  |
| TGGTCTCT        | 72               | 15               | $4.99 \times 10^{-49}$  | 2.26  |
| TTACTTA         | 71               | 22               | $1.51 \times 10^{-25}$  | 1.69  |
| <b>5'SS ESS</b> |                  |                  |                         |       |
| AAGAAGGT        | 21               | 65               | $4.83 \times 10^{-08}$  | -1.63 |
| ACGGGCG         | 21               | 66               | $3.04 \times 10^{-08}$  | -1.65 |
| AGGTGGTG        | 18               | 63               | $1.43 \times 10^{-08}$  | -1.81 |
| ATGAACG         | 32               | 98               | $2.61 \times 10^{-11}$  | -1.61 |
| ATGAGCTG        | 22               | 68               | $2.43 \times 10^{-08}$  | -1.63 |
| CCGCCGC         | 23               | 76               | $1.20 \times 10^{-09}$  | -1.72 |
| CTGACCCT        | 21               | 64               | $7.66 \times 10^{-08}$  | -1.61 |
| GAAGGAGG        | 27               | 86               | $1.99 \times 10^{-10}$  | -1.67 |
| GACCCTGC        | 29               | 190              | $1.60 \times 10^{-31}$  | -2.71 |
| GAGCGCC         | 19               | 69               | $1.75 \times 10^{-09}$  | -1.86 |
| GATGGAGG        | 17               | 84               | $2.66 \times 10^{-13}$  | -2.30 |
| GCAGTGGG        | 21               | 75               | $4.50 \times 10^{-10}$  | -1.84 |
| GGACCCT         | 69               | 267              | $8.47 \times 10^{-34}$  | -1.95 |
| GGACCCTG        | 28               | 179              | $1.53 \times 10^{-29}$  | -2.68 |
| GGCCGCG         | 23               | 76               | $1.20 \times 10^{-09}$  | -1.72 |

Continued on next page...

Table 5 – continued from previous page

| Element         | Count next to SS | Background count | Chi-square test        | LOD   |
|-----------------|------------------|------------------|------------------------|-------|
| GGCGGAC         | 19               | 67               | $4.51 \times 10^{-09}$ | -1.82 |
| GGGCAGCT        | 23               | 75               | $1.92 \times 10^{-09}$ | -1.71 |
| GGGCCCTG        | 25               | 90               | $7.30 \times 10^{-12}$ | -1.85 |
| GGGTGGG         | 12               | 69               | $6.79 \times 10^{-12}$ | -2.52 |
| GGTGACG         | 21               | 77               | $1.75 \times 10^{-10}$ | -1.87 |
| GGTGAGG         | 32               | 96               | $6.49 \times 10^{-11}$ | -1.58 |
| GGTGCG          | 58               | 203              | $2.50 \times 10^{-24}$ | -1.81 |
| GGTGCGG         | 16               | 86               | $4.41 \times 10^{-14}$ | -2.43 |
| GGTGGGC         | 27               | 100              | $2.87 \times 10^{-13}$ | -1.89 |
| GGTTGAC         | 21               | 64               | $7.66 \times 10^{-08}$ | -1.61 |
| GTGACGG         | 24               | 72               | $1.54 \times 10^{-08}$ | -1.58 |
| GTGAGCC         | 23               | 72               | $7.70 \times 10^{-09}$ | -1.65 |
| GTGGCGG         | 27               | 82               | $1.25 \times 10^{-09}$ | -1.60 |
| TGACGGG         | 17               | 65               | $2.62 \times 10^{-09}$ | -1.93 |
| TGAGCGG         | 20               | 75               | $2.14 \times 10^{-10}$ | -1.91 |
| TGGACCCT        | 16               | 180              | $2.31 \times 10^{-34}$ | -3.49 |
| TGGATCCT        | 20               | 75               | $2.14 \times 10^{-10}$ | -1.91 |
| TGGTGGGC        | 22               | 69               | $1.53 \times 10^{-08}$ | -1.65 |
| TGTGGTGG        | 15               | 66               | $3.43 \times 10^{-10}$ | -2.14 |
| <b>5'SS ISE</b> |                  |                  |                        |       |
| ACCCTCCT        | 76               | 22               | $1.14 \times 10^{-30}$ | 1.79  |
| ACCGCCC         | 82               | 21               | $1.99 \times 10^{-40}$ | 1.97  |
| ACCGCG          | 109              | 34               | $7.32 \times 10^{-38}$ | 1.68  |
| ACCGGCC         | 76               | 18               | $1.52 \times 10^{-42}$ | 2.08  |
| ACCGGGC         | 86               | 25               | $3.11 \times 10^{-34}$ | 1.78  |
| ACCGGGG         | 108              | 33               | $5.88 \times 10^{-39}$ | 1.71  |
| ACGGGGC         | 125              | 33               | $1.00 \times 10^{-57}$ | 1.92  |
| ACTGGGCC        | 68               | 21               | $1.11 \times 10^{-24}$ | 1.70  |
| ACTGGGGA        | 91               | 28               | $1.10 \times 10^{-32}$ | 1.70  |
| ACTTTAT         | 82               | 21               | $1.99 \times 10^{-40}$ | 1.97  |
| ACTTTTTT        | 80               | 22               | $4.01 \times 10^{-35}$ | 1.86  |
| AGGCCGGG        | 80               | 20               | $4.84 \times 10^{-41}$ | 2.00  |
| AGGCGGGG        | 73               | 17               | $5.12 \times 10^{-42}$ | 2.10  |
| AGGGCCGG        | 67               | 13               | $1.04 \times 10^{-50}$ | 2.37  |
| AGGGCGG         | 147              | 47               | $3.42 \times 10^{-48}$ | 1.65  |
| AGGGCGGG        | 80               | 18               | $2.30 \times 10^{-48}$ | 2.15  |
| AGGGGCGG        | 73               | 20               | $2.12 \times 10^{-32}$ | 1.87  |
| AGGGGGCC        | 74               | 21               | $6.16 \times 10^{-31}$ | 1.82  |
| AGGGGGGC        | 66               | 18               | $1.12 \times 10^{-29}$ | 1.87  |
| AGGGGGTG        | 111              | 33               | $5.40 \times 10^{-42}$ | 1.75  |
| ATATTTTT        | 123              | 31               | $2.47 \times 10^{-61}$ | 1.99  |
| ATCATTTT        | 64               | 16               | $3.55 \times 10^{-33}$ | 2.00  |

Continued on next page...



Table 5 – continued from previous page

| Element  | Count next to SS | Background count | Chi-square test         | LOD  |
|----------|------------------|------------------|-------------------------|------|
| ATCCTTT  | 79               | 19               | $4.14 \times 10^{-43}$  | 2.06 |
| ATGGGCAG | 93               | 28               | $1.11 \times 10^{-34}$  | 1.73 |
| ATGGGGGG | 67               | 20               | $7.81 \times 10^{-26}$  | 1.74 |
| ATTATTA  | 76               | 24               | $2.55 \times 10^{-26}$  | 1.66 |
| ATTTATT  | 212              | 67               | $3.22 \times 10^{-70}$  | 1.66 |
| ATTTATTT | 133              | 37               | $4.11 \times 10^{-56}$  | 1.85 |
| ATTTTATT | 112              | 35               | $9.99 \times 10^{-39}$  | 1.68 |
| ATTTTCAT | 64               | 18               | $2.17 \times 10^{-27}$  | 1.83 |
| ATTTTGTT | 82               | 26               | $4.64 \times 10^{-28}$  | 1.66 |
| ATTTTTTT | 245              | 71               | $9.70 \times 10^{-95}$  | 1.79 |
| CACCGGG  | 90               | 28               | $1.04 \times 10^{-31}$  | 1.68 |
| CAGCCGG  | 97               | 31               | $2.05 \times 10^{-32}$  | 1.65 |
| CAGGCGGG | 72               | 14               | $3.40 \times 10^{-54}$  | 2.36 |
| CAGGGCCG | 64               | 18               | $2.17 \times 10^{-27}$  | 1.83 |
| CCAGGCGG | 65               | 21               | $7.87 \times 10^{-22}$  | 1.63 |
| CCAGGGGC | 140              | 43               | $1.64 \times 10^{-49}$  | 1.70 |
| CCCATGGG | 72               | 23               | $1.66 \times 10^{-24}$  | 1.65 |
| CCCCCGC  | 79               | 20               | $9.65 \times 10^{-40}$  | 1.98 |
| CCCCCGC  | 224              | 64               | $5.48 \times 10^{-89}$  | 1.81 |
| CCCCCGCC | 127              | 30               | $3.52 \times 10^{-70}$  | 2.08 |
| CCCCCGGC | 71               | 21               | $1.02 \times 10^{-27}$  | 1.76 |
| CCCCCGGG | 104              | 25               | $3.11 \times 10^{-56}$  | 2.06 |
| CCCCGCC  | 344              | 108              | $3.60 \times 10^{-114}$ | 1.67 |
| CCCCGCCC | 214              | 59               | $1.48 \times 10^{-90}$  | 1.86 |
| CCCCGCG  | 96               | 20               | $9.07 \times 10^{-65}$  | 2.26 |
| CCCCGGCC | 85               | 22               | $3.94 \times 10^{-41}$  | 1.95 |
| CCCCGGG  | 336              | 86               | $4.51 \times 10^{-160}$ | 1.97 |
| CCCCGGGC | 107              | 18               | $1.05 \times 10^{-97}$  | 2.57 |
| CCCCGGGG | 131              | 29               | $5.24 \times 10^{-80}$  | 2.18 |
| CCCGACC  | 76               | 24               | $2.55 \times 10^{-26}$  | 1.66 |
| CCCGCC   | 731              | 217              | $9.10 \times 10^{-267}$ | 1.75 |
| CCCGCCC  | 402              | 94               | $1.77 \times 10^{-221}$ | 2.10 |
| CCCGCCCC | 201              | 51               | $5.97 \times 10^{-98}$  | 1.98 |
| CCCGCCCG | 69               | 10               | $1.10 \times 10^{-77}$  | 2.79 |
| CCCGCCCT | 90               | 20               | $3.19 \times 10^{-55}$  | 2.17 |
| CCCGCCG  | 116              | 23               | $9.03 \times 10^{-84}$  | 2.33 |
| CCCGCCT  | 142              | 43               | $1.68 \times 10^{-51}$  | 1.72 |
| CCCGCG   | 266              | 61               | $7.55 \times 10^{-152}$ | 2.12 |
| CCCGCGC  | 87               | 14               | $9.01 \times 10^{-85}$  | 2.64 |
| CCCGCGG  | 126              | 23               | $2.55 \times 10^{-102}$ | 2.45 |
| CCCGCTT  | 68               | 21               | $1.11 \times 10^{-24}$  | 1.70 |
| CCCGGCC  | 270              | 73               | $1.24 \times 10^{-117}$ | 1.89 |

Continued on next page...

Table 5 – continued from previous page

| Element  | Count next to SS | Background count | Chi-square test         | LOD  |
|----------|------------------|------------------|-------------------------|------|
| CCCGGCC  | 118              | 26               | $8.99 \times 10^{-73}$  | 2.18 |
| CCCGGCG  | 87               | 20               | $9.67 \times 10^{-51}$  | 2.12 |
| CCCGGG   | 922              | 287              | $1.61 \times 10^{-307}$ | 1.68 |
| CCCGGGC  | 264              | 59               | $6.30 \times 10^{-157}$ | 2.16 |
| CCCGGGCA | 74               | 20               | $1.43 \times 10^{-33}$  | 1.89 |
| CCCGGGCC | 121              | 21               | $1.44 \times 10^{-105}$ | 2.53 |
| CCCGGGG  | 401              | 77               | $1.92 \times 10^{-298}$ | 2.38 |
| CCCGGGGA | 78               | 17               | $1.58 \times 10^{-49}$  | 2.20 |
| CCCGGGGC | 147              | 21               | $1.98 \times 10^{-166}$ | 2.81 |
| CCCGGGGG | 124              | 23               | $1.85 \times 10^{-98}$  | 2.43 |
| CCCTCCCG | 64               | 18               | $2.17 \times 10^{-27}$  | 1.83 |
| CCCTGCCG | 66               | 18               | $1.12 \times 10^{-29}$  | 1.87 |
| CCGCC    | 734              | 208              | $2.95 \times 10^{-291}$ | 1.82 |
| CCGCCCC  | 337              | 89               | $2.60 \times 10^{-152}$ | 1.92 |
| CCGCCCCC | 123              | 33               | $2.54 \times 10^{-55}$  | 1.90 |
| CCGCCCCG | 80               | 12               | $8.58 \times 10^{-86}$  | 2.74 |
| CCGCCCCT | 69               | 21               | $1.13 \times 10^{-25}$  | 1.72 |
| CCGCCCG  | 132              | 18               | $4.90 \times 10^{-159}$ | 2.87 |
| CCGCCCGC | 65               | 5                | $1.34 \times 10^{-158}$ | 3.70 |
| CCGCCCTG | 67               | 15               | $4.24 \times 10^{-41}$  | 2.16 |
| CCGCCG   | 263              | 72               | $3.32 \times 10^{-112}$ | 1.87 |
| CCGCCGC  | 110              | 21               | $5.08 \times 10^{-84}$  | 2.39 |
| CCGCCGG  | 88               | 18               | $3.72 \times 10^{-61}$  | 2.29 |
| CCGCG    | 660              | 194              | $1.95 \times 10^{-245}$ | 1.77 |
| CCGCGC   | 220              | 51               | $8.27 \times 10^{-124}$ | 2.11 |
| CCGCGCC  | 77               | 16               | $1.65 \times 10^{-52}$  | 2.27 |
| CCGCGG   | 299              | 68               | $1.12 \times 10^{-172}$ | 2.14 |
| CCGCGGC  | 108              | 21               | $2.27 \times 10^{-80}$  | 2.36 |
| CCGCGGCC | 65               | 10               | $9.39 \times 10^{-68}$  | 2.70 |
| CCGCGGG  | 134              | 20               | $2.46 \times 10^{-143}$ | 2.74 |
| CCGCGGGG | 64               | 5                | $2.00 \times 10^{-153}$ | 3.68 |
| CCGGCAG  | 110              | 35               | $7.89 \times 10^{-37}$  | 1.65 |
| CCGGCC   | 566              | 174              | $4.42 \times 10^{-194}$ | 1.70 |
| CCGGCCC  | 218              | 61               | $7.08 \times 10^{-90}$  | 1.84 |
| CCGGCCCC | 89               | 23               | $4.31 \times 10^{-43}$  | 1.95 |
| CCGGCCCT | 72               | 16               | $1.56 \times 10^{-44}$  | 2.17 |
| CCGGCCG  | 123              | 18               | $3.19 \times 10^{-135}$ | 2.77 |
| CCGGCCGG | 73               | 6                | $1.00 \times 10^{-164}$ | 3.60 |
| CCGGCG   | 203              | 59               | $2.03 \times 10^{-78}$  | 1.78 |
| CCGGCGG  | 100              | 23               | $5.22 \times 10^{-58}$  | 2.12 |
| CCGGGAGG | 74               | 23               | $2.06 \times 10^{-26}$  | 1.69 |
| CCGGGC   | 692              | 208              | $6.25 \times 10^{-247}$ | 1.73 |

Continued on next page...

Table 5 – continued from previous page

| Element  | Count next to SS | Background count | Chi-square test         | LOD  |
|----------|------------------|------------------|-------------------------|------|
| CCGGGCAG | 86               | 16               | $1.43 \times 10^{-68}$  | 2.43 |
| CCGGGCC  | 240              | 62               | $3.76 \times 10^{-113}$ | 1.95 |
| CCGGGCCC | 120              | 23               | $5.78 \times 10^{-91}$  | 2.38 |
| CCGGGCCG | 77               | 3                | 0.00                    | 4.68 |
| CCGGGCG  | 136              | 35               | $2.39 \times 10^{-65}$  | 1.96 |
| CCGGGCGG | 76               | 7                | $6.21 \times 10^{-150}$ | 3.44 |
| CCGGGCT  | 165              | 53               | $2.08 \times 10^{-53}$  | 1.64 |
| CCGGGCTG | 94               | 19               | $2.38 \times 10^{-66}$  | 2.31 |
| CCGGGG   | 877              | 207              | 0.00                    | 2.08 |
| CCGGGGA  | 152              | 49               | $5.21 \times 10^{-49}$  | 1.63 |
| CCGGGGC  | 316              | 54               | $2.04 \times 10^{-278}$ | 2.55 |
| CCGGGGCA | 65               | 14               | $2.64 \times 10^{-42}$  | 2.22 |
| CCGGGGCC | 131              | 19               | $1.34 \times 10^{-145}$ | 2.79 |
| CCGGGGCG | 70               | 5                | $8.88 \times 10^{-186}$ | 3.81 |
| CCGGGGCT | 86               | 18               | $8.17 \times 10^{-58}$  | 2.26 |
| CCGGGGG  | 256              | 49               | $3.45 \times 10^{-192}$ | 2.39 |
| CCGGGGGC | 92               | 18               | $3.96 \times 10^{-68}$  | 2.35 |
| CCGGGGGG | 77               | 15               | $1.12 \times 10^{-57}$  | 2.36 |
| CCGGGGGT | 141              | 39               | $5.73 \times 10^{-60}$  | 1.85 |
| CCGGGGTG | 64               | 13               | $2.01 \times 10^{-45}$  | 2.30 |
| CCTCCCCG | 87               | 21               | $4.99 \times 10^{-47}$  | 2.05 |
| CCTGCCCG | 75               | 21               | $4.73 \times 10^{-32}$  | 1.84 |
| CCTGGGCG | 78               | 17               | $1.58 \times 10^{-49}$  | 2.20 |
| CCTGGGGC | 232              | 70               | $1.58 \times 10^{-83}$  | 1.73 |
| CGCCCC   | 181              | 58               | $1.12 \times 10^{-58}$  | 1.64 |
| CGCCCCG  | 111              | 22               | $2.75 \times 10^{-80}$  | 2.33 |
| CGCCCG   | 233              | 62               | $1.41 \times 10^{-104}$ | 1.91 |
| CGCCCGC  | 93               | 26               | $1.95 \times 10^{-39}$  | 1.84 |
| CGCCCGG  | 103              | 20               | $6.84 \times 10^{-77}$  | 2.36 |
| CGCCCTT  | 68               | 20               | $7.11 \times 10^{-27}$  | 1.77 |
| CGCCGC   | 166              | 52               | $2.69 \times 10^{-56}$  | 1.67 |
| CGCCGCC  | 81               | 17               | $2.45 \times 10^{-54}$  | 2.25 |
| CGCCGG   | 167              | 51               | $2.49 \times 10^{-59}$  | 1.71 |
| CGCCGGC  | 65               | 11               | $1.33 \times 10^{-59}$  | 2.56 |
| CGCCGGG  | 89               | 27               | $8.06 \times 10^{-33}$  | 1.72 |
| CGCGC    | 447              | 140              | $1.97 \times 10^{-148}$ | 1.67 |
| CGCGCC   | 164              | 40               | $1.37 \times 10^{-85}$  | 2.04 |
| CGCGCCC  | 71               | 20               | $3.99 \times 10^{-30}$  | 1.83 |
| CGCGCG   | 125              | 29               | $4.37 \times 10^{-71}$  | 2.11 |
| CGCGGC   | 190              | 54               | $1.80 \times 10^{-76}$  | 1.81 |
| CGCGGCC  | 83               | 21               | $1.05 \times 10^{-41}$  | 1.98 |
| CGCGGG   | 280              | 70               | $4.95 \times 10^{-139}$ | 2.00 |

Continued on next page...

Table 5 – continued from previous page

| Element  | Count next to SS | Background count | Chi-square test         | LOD  |
|----------|------------------|------------------|-------------------------|------|
| CGCGGGC  | 96               | 20               | $9.07 \times 10^{-65}$  | 2.26 |
| CGCGGGG  | 107              | 24               | $2.19 \times 10^{-64}$  | 2.16 |
| CGCGTC   | 78               | 22               | $7.38 \times 10^{-33}$  | 1.83 |
| CGCTTTT  | 65               | 16               | $1.68 \times 10^{-34}$  | 2.02 |
| CGGCCCC  | 191              | 57               | $1.76 \times 10^{-70}$  | 1.74 |
| CGGCCCCC | 79               | 15               | $2.43 \times 10^{-61}$  | 2.40 |
| CGGCCCG  | 105              | 20               | $1.50 \times 10^{-80}$  | 2.39 |
| CGGCCG   | 282              | 79               | $1.85 \times 10^{-115}$ | 1.84 |
| CGGCCGC  | 101              | 25               | $3.53 \times 10^{-52}$  | 2.01 |
| CGGCCGG  | 136              | 21               | $5.62 \times 10^{-139}$ | 2.70 |
| CGGCCGGG | 75               | 6                | $1.40 \times 10^{-174}$ | 3.64 |
| CGGCCG   | 245              | 68               | $3.33 \times 10^{-102}$ | 1.85 |
| CGGCCGGG | 138              | 28               | $5.54 \times 10^{-96}$  | 2.30 |
| CGGCTGGG | 70               | 15               | $9.03 \times 10^{-46}$  | 2.22 |
| CGGGAGGG | 81               | 21               | $3.60 \times 10^{-39}$  | 1.95 |
| CGGGCAG  | 184              | 59               | $1.51 \times 10^{-59}$  | 1.64 |
| CGGGCAGG | 84               | 18               | $1.44 \times 10^{-54}$  | 2.22 |
| CGGGCC   | 524              | 158              | $2.10 \times 10^{-186}$ | 1.73 |
| CGGGCCC  | 205              | 54               | $7.90 \times 10^{-94}$  | 1.92 |
| CGGGCCCC | 71               | 15               | $2.19 \times 10^{-47}$  | 2.24 |
| CGGGCCG  | 135              | 19               | $4.89 \times 10^{-156}$ | 2.83 |
| CGGGCCGG | 81               | 6                | $6.91 \times 10^{-206}$ | 3.75 |
| CGGGCG   | 295              | 84               | $2.78 \times 10^{-117}$ | 1.81 |
| CGGGCGC  | 97               | 23               | $1.03 \times 10^{-53}$  | 2.08 |
| CGGGCGG  | 153              | 25               | $1.52 \times 10^{-144}$ | 2.61 |
| CGGGCGGG | 86               | 6                | $5.80 \times 10^{-234}$ | 3.84 |
| CGGGCTGG | 83               | 16               | $5.66 \times 10^{-63}$  | 2.38 |
| CGGGGAC  | 106              | 34               | $4.99 \times 10^{-35}$  | 1.64 |
| CGGGGC   | 880              | 219              | 0.00                    | 2.01 |
| CGGGGCA  | 168              | 43               | $5.17 \times 10^{-81}$  | 1.97 |
| CGGGGCAG | 89               | 20               | $1.05 \times 10^{-53}$  | 2.15 |
| CGGGGCC  | 335              | 60               | $4.45 \times 10^{-276}$ | 2.48 |
| CGGGGCCC | 106              | 13               | $1.05 \times 10^{-146}$ | 3.03 |
| CGGGGCCG | 82               | 12               | $8.44 \times 10^{-91}$  | 2.77 |
| CGGGGCCT | 86               | 20               | $2.73 \times 10^{-49}$  | 2.10 |
| CGGGGCG  | 175              | 32               | $5.40 \times 10^{-141}$ | 2.45 |
| CGGGGCGG | 107              | 13               | $7.78 \times 10^{-150}$ | 3.04 |
| CGGGGCTG | 127              | 34               | $2.87 \times 10^{-57}$  | 1.90 |
| CGGGGGC  | 241              | 69               | $3.02 \times 10^{-95}$  | 1.80 |
| CGGGGGCC | 89               | 21               | $8.21 \times 10^{-50}$  | 2.08 |
| CGGGGGG  | 176              | 58               | $3.79 \times 10^{-54}$  | 1.60 |
| CGGGGGGC | 78               | 18               | $2.09 \times 10^{-45}$  | 2.12 |

Continued on next page...

Table 5 – continued from previous page

| Element  | Count next to SS | Background count | Chi-square test         | LOD  |
|----------|------------------|------------------|-------------------------|------|
| CGGGGGGG | 67               | 20               | $7.81 \times 10^{-26}$  | 1.74 |
| CGGGGGT  | 108              | 34               | $6.63 \times 10^{-37}$  | 1.67 |
| CGGGGTG  | 158              | 51               | $9.46 \times 10^{-51}$  | 1.63 |
| CGGGGTGG | 80               | 20               | $4.84 \times 10^{-41}$  | 2.00 |
| CGGGTGGG | 85               | 23               | $3.13 \times 10^{-38}$  | 1.89 |
| CTCGCG   | 88               | 27               | $7.99 \times 10^{-32}$  | 1.70 |
| CTCGGGG  | 201              | 54               | $5.04 \times 10^{-89}$  | 1.90 |
| CTCGGGGC | 69               | 12               | $7.78 \times 10^{-61}$  | 2.52 |
| CTGCCCCG | 91               | 27               | $7.35 \times 10^{-35}$  | 1.75 |
| CTGCCCGC | 67               | 21               | $1.04 \times 10^{-23}$  | 1.67 |
| CTGCCCGG | 70               | 21               | $1.10 \times 10^{-26}$  | 1.74 |
| CTGCGGGG | 71               | 16               | $5.09 \times 10^{-43}$  | 2.15 |
| CTGGCGGG | 72               | 15               | $4.99 \times 10^{-49}$  | 2.26 |
| CTGGGCCC | 220              | 65               | $2.26 \times 10^{-82}$  | 1.76 |
| CTGGGCCG | 85               | 23               | $3.13 \times 10^{-38}$  | 1.89 |
| CTGGGCGG | 79               | 20               | $9.65 \times 10^{-40}$  | 1.98 |
| CTGGGGAC | 132              | 43               | $5.83 \times 10^{-42}$  | 1.62 |
| CTGGGGC  | 690              | 206              | $2.63 \times 10^{-249}$ | 1.74 |
| CTGGGGCA | 171              | 56               | $2.70 \times 10^{-53}$  | 1.61 |
| CTGGGGCC | 236              | 62               | $3.28 \times 10^{-108}$ | 1.93 |
| CTGGGGCG | 103              | 15               | $2.74 \times 10^{-114}$ | 2.78 |
| CTGGGGGC | 241              | 65               | $1.19 \times 10^{-105}$ | 1.89 |
| CTGGGGGG | 183              | 49               | $1.11 \times 10^{-81}$  | 1.90 |
| CTGGGGTC | 125              | 38               | $3.14 \times 10^{-45}$  | 1.72 |
| CTTTATTT | 72               | 23               | $1.66 \times 10^{-24}$  | 1.65 |
| CTTTGAT  | 70               | 15               | $9.03 \times 10^{-46}$  | 2.22 |
| CTTTTAAA | 70               | 21               | $1.10 \times 10^{-26}$  | 1.74 |
| CTTTTATT | 68               | 16               | $1.22 \times 10^{-38}$  | 2.09 |
| CTTTTCT  | 78               | 19               | $9.64 \times 10^{-42}$  | 2.04 |
| GACGCTG  | 66               | 21               | $9.25 \times 10^{-23}$  | 1.65 |
| GAGGGGAC | 83               | 27               | $4.41 \times 10^{-27}$  | 1.62 |
| GAGGGGGC | 121              | 37               | $2.23 \times 10^{-43}$  | 1.71 |
| GAGGGGGG | 106              | 31               | $2.33 \times 10^{-41}$  | 1.77 |
| GCAGCCCC | 134              | 43               | $8.67 \times 10^{-44}$  | 1.64 |
| GCAGGGCC | 159              | 50               | $1.30 \times 10^{-53}$  | 1.67 |
| GCCAGGCG | 64               | 18               | $2.17 \times 10^{-27}$  | 1.83 |
| GCCAGGGC | 172              | 55               | $4.52 \times 10^{-56}$  | 1.64 |
| GCCAGGGG | 137              | 39               | $1.70 \times 10^{-55}$  | 1.81 |
| GCCAGGGT | 100              | 27               | $7.82 \times 10^{-45}$  | 1.89 |
| GCCCCCCC | 105              | 30               | $1.12 \times 10^{-42}$  | 1.81 |
| GCCCCCCG | 70               | 23               | $1.12 \times 10^{-22}$  | 1.61 |
| GCCCCCG  | 212              | 66               | $3.25 \times 10^{-72}$  | 1.68 |

Continued on next page...

Table 5 – continued from previous page

| Element   | Count next to SS | Background count | Chi-square test         | LOD  |
|-----------|------------------|------------------|-------------------------|------|
| GCCCCCGC  | 64               | 14               | $9.93 \times 10^{-41}$  | 2.19 |
| GCCCCCGG  | 77               | 21               | $2.42 \times 10^{-34}$  | 1.87 |
| GCCCCCTC  | 116              | 37               | $1.44 \times 10^{-38}$  | 1.65 |
| GCCCCCTG  | 122              | 37               | $2.25 \times 10^{-44}$  | 1.72 |
| GCCCCG    | 661              | 201              | $5.91 \times 10^{-231}$ | 1.72 |
| GCCCCGC   | 227              | 54               | $1.50 \times 10^{-122}$ | 2.07 |
| GCCCCGCC  | 126              | 26               | $1.23 \times 10^{-85}$  | 2.28 |
| GCCCCGG   | 268              | 67               | $3.69 \times 10^{-133}$ | 2.00 |
| GCCCCGGC  | 65               | 16               | $1.68 \times 10^{-34}$  | 2.02 |
| GCCCCGGG  | 126              | 23               | $2.55 \times 10^{-102}$ | 2.45 |
| GCCCCCTCC | 187              | 57               | $1.91 \times 10^{-66}$  | 1.71 |
| GCCCCCTGC | 167              | 54               | $2.32 \times 10^{-53}$  | 1.63 |
| GCCCCG    | 501              | 143              | $6.23 \times 10^{-197}$ | 1.81 |
| GCCCCGCC  | 224              | 48               | $2.30 \times 10^{-142}$ | 2.22 |
| GCCCCGCCC | 121              | 13               | $3.92 \times 10^{-197}$ | 3.22 |
| GCCCCGCG  | 99               | 18               | $2.95 \times 10^{-81}$  | 2.46 |
| GCCCCGG   | 616              | 185              | $2.20 \times 10^{-220}$ | 1.74 |
| GCCCCGGC  | 200              | 55               | $3.96 \times 10^{-85}$  | 1.86 |
| GCCCCGGCC | 92               | 21               | $3.84 \times 10^{-54}$  | 2.13 |
| GCCCCGGG  | 304              | 64               | $9.69 \times 10^{-198}$ | 2.25 |
| GCCCCGGGC | 94               | 15               | $1.75 \times 10^{-92}$  | 2.65 |
| GCCCCGGGG | 144              | 23               | $1.86 \times 10^{-140}$ | 2.65 |
| GCCCCGTC  | 76               | 25               | $1.98 \times 10^{-24}$  | 1.60 |
| GCCCCTCCC | 175              | 57               | $4.57 \times 10^{-55}$  | 1.62 |
| GCCGC     | 1226             | 379              | 0.00                    | 1.69 |
| GCCGCAC   | 67               | 18               | $7.43 \times 10^{-31}$  | 1.90 |
| GCCGCC    | 484              | 143              | $7.27 \times 10^{-179}$ | 1.76 |
| GCCGCC    | 230              | 52               | $1.57 \times 10^{-134}$ | 2.15 |
| GCCGCCCC  | 88               | 13               | $4.21 \times 10^{-96}$  | 2.76 |
| GCCGCCG   | 107              | 29               | $1.52 \times 10^{-47}$  | 1.88 |
| GCCGCCG   | 265              | 59               | $1.93 \times 10^{-158}$ | 2.17 |
| GCCGCCGC  | 90               | 19               | $1.19 \times 10^{-59}$  | 2.24 |
| GCCGCCGG  | 134              | 20               | $2.46 \times 10^{-143}$ | 2.74 |
| GCCGCCGGG | 69               | 8                | $3.68 \times 10^{-103}$ | 3.11 |
| GCCGCCTC  | 87               | 17               | $1.20 \times 10^{-64}$  | 2.36 |
| GCCGGC    | 420              | 119              | $1.34 \times 10^{-167}$ | 1.82 |
| GCCGGCC   | 207              | 40               | $1.19 \times 10^{-153}$ | 2.37 |
| GCCGGCCC  | 78               | 13               | $1.18 \times 10^{-72}$  | 2.58 |
| GCCGGCG   | 78               | 17               | $1.58 \times 10^{-49}$  | 2.20 |
| GCCGGG    | 856              | 227              | 0.00                    | 1.91 |
| GCCGGGC   | 281              | 77               | $1.48 \times 10^{-119}$ | 1.87 |
| GCCGGGCC  | 109              | 19               | $1.03 \times 10^{-94}$  | 2.52 |

Continued on next page...

Table 5 – continued from previous page

| Element  | Count next to SS | Background count | Chi-square test         | LOD  |
|----------|------------------|------------------|-------------------------|------|
| GCCGGGCG | 73               | 22               | $1.55 \times 10^{-27}$  | 1.73 |
| GCCGGGCT | 67               | 11               | $5.83 \times 10^{-64}$  | 2.61 |
| GCCGGGG  | 350              | 59               | 0.00                    | 2.57 |
| GCCGGGGA | 69               | 15               | $3.48 \times 10^{-44}$  | 2.20 |
| GCCGGGGC | 130              | 17               | $2.29 \times 10^{-165}$ | 2.93 |
| GCCGGGGG | 114              | 18               | $2.32 \times 10^{-113}$ | 2.66 |
| GCCTGCCC | 152              | 44               | $1.33 \times 10^{-59}$  | 1.79 |
| GCCTGGGG | 240              | 65               | $1.79 \times 10^{-104}$ | 1.88 |
| GCGCCC   | 390              | 115              | $4.87 \times 10^{-145}$ | 1.76 |
| GCGCCCC  | 142              | 33               | $2.77 \times 10^{-80}$  | 2.11 |
| GCGCCCG  | 92               | 20               | $2.56 \times 10^{-58}$  | 2.20 |
| GCGCCG   | 188              | 59               | $2.67 \times 10^{-63}$  | 1.67 |
| GCGCCGC  | 65               | 16               | $1.68 \times 10^{-34}$  | 2.02 |
| GCGCCGG  | 76               | 15               | $6.85 \times 10^{-56}$  | 2.34 |
| GCGCCTC  | 83               | 26               | $5.19 \times 10^{-29}$  | 1.67 |
| GCGCGC   | 142              | 43               | $1.68 \times 10^{-51}$  | 1.72 |
| GCGCGG   | 218              | 50               | $8.86 \times 10^{-125}$ | 2.12 |
| GCGCGGC  | 65               | 10               | $9.39 \times 10^{-68}$  | 2.70 |
| GCGCGGG  | 104              | 20               | $1.04 \times 10^{-78}$  | 2.38 |
| GCGGCC   | 162              | 45               | $3.99 \times 10^{-68}$  | 1.85 |
| GCGGCCC  | 71               | 15               | $2.19 \times 10^{-47}$  | 2.24 |
| GCGGCCG  | 114              | 21               | $1.44 \times 10^{-91}$  | 2.44 |
| GCGGCG   | 209              | 53               | $7.25 \times 10^{-102}$ | 1.98 |
| GCGGCGG  | 96               | 21               | $3.32 \times 10^{-60}$  | 2.19 |
| GCGGCGGG | 76               | 10               | $9.81 \times 10^{-97}$  | 2.93 |
| GCGGGAGG | 75               | 21               | $4.73 \times 10^{-32}$  | 1.84 |
| GCGGGC   | 530              | 154              | $1.15 \times 10^{-201}$ | 1.78 |
| GCGGGCC  | 175              | 40               | $4.29 \times 10^{-101}$ | 2.13 |
| GCGGGCG  | 142              | 33               | $2.77 \times 10^{-80}$  | 2.11 |
| GCGGGCGG | 75               | 10               | $6.96 \times 10^{-94}$  | 2.91 |
| GCGGGCT  | 106              | 30               | $8.89 \times 10^{-44}$  | 1.82 |
| GCGGGG   | 851              | 245              | 0.00                    | 1.80 |
| GCGGGGAG | 67               | 21               | $1.04 \times 10^{-23}$  | 1.67 |
| GCGGGGC  | 380              | 70               | $1.63 \times 10^{-300}$ | 2.44 |
| GCGGGGCC | 131              | 22               | $1.84 \times 10^{-119}$ | 2.57 |
| GCGGGGCG | 101              | 11               | $3.70 \times 10^{-162}$ | 3.20 |
| GCGGGGCT | 102              | 25               | $1.63 \times 10^{-53}$  | 2.03 |
| GCGGGGG  | 239              | 72               | $3.11 \times 10^{-86}$  | 1.73 |
| GCGGGGGC | 79               | 21               | $1.03 \times 10^{-36}$  | 1.91 |
| GCGGGGGG | 80               | 24               | $2.93 \times 10^{-30}$  | 1.74 |
| GCGGGGT  | 115              | 35               | $1.15 \times 10^{-41}$  | 1.72 |
| GCTCGGG  | 122              | 35               | $5.92 \times 10^{-49}$  | 1.80 |

Continued on next page...

Table 5 – continued from previous page

| Element   | Count next to SS | Background count | Chi-square test         | LOD  |
|-----------|------------------|------------------|-------------------------|------|
| GCTGCCCC  | 178              | 56               | $9.38 \times 10^{-60}$  | 1.67 |
| GCTGGGCC  | 212              | 58               | $6.34 \times 10^{-91}$  | 1.87 |
| GCTGGGGC  | 205              | 54               | $7.90 \times 10^{-94}$  | 1.92 |
| GCTGGGGG  | 244              | 65               | $3.25 \times 10^{-109}$ | 1.91 |
| GCTTGGGG  | 94               | 30               | $1.52 \times 10^{-31}$  | 1.65 |
| GGCCAGGG  | 193              | 54               | $8.47 \times 10^{-80}$  | 1.84 |
| GGCCCCCG  | 70               | 18               | $1.55 \times 10^{-34}$  | 1.96 |
| GGCCCCCT  | 98               | 25               | $2.81 \times 10^{-48}$  | 1.97 |
| GGCCCCG   | 263              | 69               | $1.22 \times 10^{-120}$ | 1.93 |
| GGCCCCGC  | 91               | 16               | $1.93 \times 10^{-78}$  | 2.51 |
| GGCCCCGG  | 118              | 27               | $1.14 \times 10^{-68}$  | 2.13 |
| GGCCCCCTC | 111              | 30               | $1.74 \times 10^{-49}$  | 1.89 |
| GGCCCCGC  | 114              | 37               | $1.00 \times 10^{-36}$  | 1.62 |
| GGCCCCGG  | 240              | 71               | $1.76 \times 10^{-89}$  | 1.76 |
| GGCCCCGGC | 76               | 15               | $6.85 \times 10^{-56}$  | 2.34 |
| GGCCCCGGG | 112              | 27               | $3.79 \times 10^{-60}$  | 2.05 |
| GGCCCCGT  | 72               | 18               | $4.13 \times 10^{-37}$  | 2.00 |
| GGCCGC    | 442              | 136              | $9.28 \times 10^{-152}$ | 1.70 |
| GGCCGCA   | 88               | 27               | $7.99 \times 10^{-32}$  | 1.70 |
| GGCCGCCC  | 72               | 16               | $1.56 \times 10^{-44}$  | 2.17 |
| GGCCGCG   | 106              | 22               | $1.00 \times 10^{-71}$  | 2.27 |
| GGCCGCGG  | 65               | 9                | $9.24 \times 10^{-78}$  | 2.85 |
| GGCCGG    | 679              | 197              | $1.82 \times 10^{-258}$ | 1.79 |
| GGCCGGC   | 180              | 45               | $4.48 \times 10^{-90}$  | 2.00 |
| GGCCGGCC  | 71               | 16               | $5.09 \times 10^{-43}$  | 2.15 |
| GGCCGGG   | 390              | 87               | $1.70 \times 10^{-231}$ | 2.16 |
| GGCCGGGA  | 68               | 18               | $4.66 \times 10^{-32}$  | 1.92 |
| GGCCGGGC  | 141              | 32               | $9.82 \times 10^{-83}$  | 2.14 |
| GGCCGGGG  | 152              | 26               | $8.19 \times 10^{-135}$ | 2.55 |
| GGCCGTGG  | 71               | 21               | $1.02 \times 10^{-27}$  | 1.76 |
| GGCGCC    | 405              | 134              | $3.26 \times 10^{-121}$ | 1.60 |
| GGCGCCC   | 148              | 39               | $3.20 \times 10^{-68}$  | 1.92 |
| GGCGCCG   | 87               | 20               | $9.67 \times 10^{-51}$  | 2.12 |
| GGCGCG    | 190              | 56               | $1.05 \times 10^{-71}$  | 1.76 |
| GGCGCGG   | 96               | 24               | $6.74 \times 10^{-49}$  | 2.00 |
| GGCGCTGG  | 67               | 21               | $1.04 \times 10^{-23}$  | 1.67 |
| GGCGGCC   | 183              | 45               | $4.89 \times 10^{-94}$  | 2.02 |
| GGCGGCG   | 89               | 20               | $1.05 \times 10^{-53}$  | 2.15 |
| GGCGGGAG  | 75               | 18               | $3.77 \times 10^{-41}$  | 2.06 |
| GGCGGGC   | 226              | 67               | $4.72 \times 10^{-84}$  | 1.75 |
| GGCGGGCC  | 67               | 16               | $3.12 \times 10^{-37}$  | 2.07 |
| GGCGGGCG  | 67               | 15               | $4.24 \times 10^{-41}$  | 2.16 |

Continued on next page...



Table 5 – continued from previous page

| Element  | Count next to SS | Background count | Chi-square test         | LOD  |
|----------|------------------|------------------|-------------------------|------|
| GGCGGGG  | 414              | 104              | $5.72 \times 10^{-203}$ | 1.99 |
| GGCGGGGC | 187              | 37               | $2.87 \times 10^{-134}$ | 2.34 |
| GGCGGGGG | 139              | 33               | $4.99 \times 10^{-76}$  | 2.07 |
| GGCTCGG  | 116              | 38               | $1.07 \times 10^{-36}$  | 1.61 |
| GGCTCGGG | 64               | 13               | $2.01 \times 10^{-45}$  | 2.30 |
| GGCTGGGC | 221              | 71               | $6.82 \times 10^{-71}$  | 1.64 |
| GGCTGGGG | 299              | 92               | $2.67 \times 10^{-103}$ | 1.70 |
| GGGAGGGT | 122              | 32               | $5.40 \times 10^{-57}$  | 1.93 |
| GGGCAGGG | 359              | 107              | $4.29 \times 10^{-131}$ | 1.75 |
| GGGCCCC  | 470              | 142              | $8.58 \times 10^{-167}$ | 1.73 |
| GGGCCCCC | 100              | 31               | $2.86 \times 10^{-35}$  | 1.69 |
| GGGCCCCG | 133              | 21               | $6.35 \times 10^{-132}$ | 2.66 |
| GGGCCCCT | 118              | 38               | $1.63 \times 10^{-38}$  | 1.63 |
| GGGCCCG  | 215              | 59               | $1.05 \times 10^{-91}$  | 1.87 |
| GGGCCCGG | 119              | 18               | $2.89 \times 10^{-125}$ | 2.72 |
| GGGCCCTG | 192              | 62               | $3.10 \times 10^{-61}$  | 1.63 |
| GGGCCG   | 632              | 191              | $1.88 \times 10^{-223}$ | 1.73 |
| GGGCCGC  | 139              | 42               | $1.20 \times 10^{-50}$  | 1.73 |
| GGGCCGG  | 353              | 79               | $1.11 \times 10^{-208}$ | 2.16 |
| GGGCCGGC | 76               | 14               | $1.14 \times 10^{-61}$  | 2.44 |
| GGGCCGGG | 228              | 34               | $1.02 \times 10^{-242}$ | 2.75 |
| GGGCCTGG | 273              | 85               | $1.98 \times 10^{-92}$  | 1.68 |
| GGGCGCC  | 154              | 48               | $7.65 \times 10^{-53}$  | 1.68 |
| GGGCGCG  | 76               | 18               | $1.52 \times 10^{-42}$  | 2.08 |
| GGGCGCTG | 65               | 18               | $1.60 \times 10^{-28}$  | 1.85 |
| GGGCGGC  | 189              | 48               | $4.47 \times 10^{-92}$  | 1.98 |
| GGGCGGCC | 85               | 18               | $3.53 \times 10^{-56}$  | 2.24 |
| GGGCGGG  | 437              | 114              | $4.84 \times 10^{-201}$ | 1.94 |
| GGGCGGGA | 74               | 12               | $1.22 \times 10^{-71}$  | 2.62 |
| GGGCGGGC | 111              | 20               | $4.81 \times 10^{-92}$  | 2.47 |
| GGGCGGGG | 258              | 63               | $2.78 \times 10^{-133}$ | 2.03 |
| GGGCTCG  | 110              | 35               | $7.89 \times 10^{-37}$  | 1.65 |
| GGGCTCGG | 66               | 14               | $6.55 \times 10^{-44}$  | 2.24 |
| GGGCTGGG | 411              | 124              | $1.73 \times 10^{-146}$ | 1.73 |
| GGGGCACC | 67               | 20               | $7.81 \times 10^{-26}$  | 1.74 |
| GGGGCAGG | 272              | 69               | $6.64 \times 10^{-132}$ | 1.98 |
| GGGGCC   | 1666             | 506              | 0.00                    | 1.72 |
| GGGGCCC  | 601              | 151              | $1.29 \times 10^{-293}$ | 1.99 |
| GGGGCCCA | 136              | 42               | $1.13 \times 10^{-47}$  | 1.70 |
| GGGGCCCC | 176              | 37               | $1.41 \times 10^{-115}$ | 2.25 |
| GGGGCCCG | 116              | 17               | $2.13 \times 10^{-127}$ | 2.77 |
| GGGGCCCT | 156              | 39               | $2.56 \times 10^{-78}$  | 2.00 |

Continued on next page...

Table 5 – continued from previous page

| Element  | Count next to SS | Background count | Chi-square test         | LOD  |
|----------|------------------|------------------|-------------------------|------|
| GGGGCCG  | 318              | 71               | $6.89 \times 10^{-189}$ | 2.16 |
| GGGGCCGC | 73               | 15               | $1.06 \times 10^{-50}$  | 2.28 |
| GGGGCCGG | 177              | 29               | $2.80 \times 10^{-166}$ | 2.61 |
| GGGGCCT  | 435              | 140              | $3.28 \times 10^{-137}$ | 1.64 |
| GGGGCCTC | 93               | 29               | $1.42 \times 10^{-32}$  | 1.68 |
| GGGGCCTG | 238              | 69               | $5.09 \times 10^{-92}$  | 1.79 |
| GGGGCG   | 680              | 202              | $5.45 \times 10^{-248}$ | 1.75 |
| GGGGCGC  | 159              | 40               | $5.61 \times 10^{-79}$  | 1.99 |
| GGGGCGCC | 68               | 11               | $3.37 \times 10^{-66}$  | 2.63 |
| GGGGCGG  | 374              | 99               | $3.77 \times 10^{-168}$ | 1.92 |
| GGGGCGGC | 88               | 14               | $4.66 \times 10^{-87}$  | 2.65 |
| GGGGCGGG | 244              | 57               | $1.93 \times 10^{-135}$ | 2.10 |
| GGGGCTGC | 185              | 53               | $1.79 \times 10^{-73}$  | 1.80 |
| GGGGCTGG | 356              | 111              | $1.27 \times 10^{-119}$ | 1.68 |
| GGGGGCAG | 183              | 60               | $8.80 \times 10^{-57}$  | 1.61 |
| GGGGGCC  | 378              | 107              | $2.72 \times 10^{-151}$ | 1.82 |
| GGGGGCCC | 126              | 27               | $6.24 \times 10^{-81}$  | 2.22 |
| GGGGGCCG | 103              | 18               | $2.74 \times 10^{-89}$  | 2.52 |
| GGGGGCG  | 233              | 59               | $1.30 \times 10^{-113}$ | 1.98 |
| GGGGGCGG | 154              | 30               | $1.78 \times 10^{-113}$ | 2.36 |
| GGGGGGAG | 145              | 42               | $7.04 \times 10^{-57}$  | 1.79 |
| GGGGGGC  | 327              | 107              | $2.21 \times 10^{-100}$ | 1.61 |
| GGGGGGCA | 110              | 29               | $3.93 \times 10^{-51}$  | 1.92 |
| GGGGGGCC | 81               | 20               | $2.31 \times 10^{-42}$  | 2.02 |
| GGGGGGCG | 83               | 18               | $5.56 \times 10^{-53}$  | 2.21 |
| GGGGGGGC | 99               | 27               | $1.16 \times 10^{-43}$  | 1.87 |
| GGGGTGGG | 450              | 127              | $1.12 \times 10^{-180}$ | 1.83 |
| GGGTGGGA | 207              | 68               | $9.40 \times 10^{-64}$  | 1.61 |
| GGGTGGGC | 175              | 56               | $6.11 \times 10^{-57}$  | 1.64 |
| GGGTGGGG | 460              | 136              | $6.85 \times 10^{-170}$ | 1.76 |
| GGTGGGGA | 216              | 68               | $4.98 \times 10^{-72}$  | 1.67 |
| GGTGGGGG | 367              | 100              | $4.64 \times 10^{-157}$ | 1.88 |
| GGTGGGGT | 153              | 48               | $6.96 \times 10^{-52}$  | 1.67 |
| GTGCCGC  | 64               | 18               | $2.17 \times 10^{-27}$  | 1.83 |
| GTGGGCC  | 102              | 32               | $3.59 \times 10^{-35}$  | 1.67 |
| GTGGGCGG | 69               | 21               | $1.13 \times 10^{-25}$  | 1.72 |
| GTGGGGAC | 96               | 30               | $1.94 \times 10^{-33}$  | 1.68 |
| GTGGGGCC | 163              | 42               | $8.54 \times 10^{-78}$  | 1.96 |
| GTGGGGCG | 68               | 16               | $1.22 \times 10^{-38}$  | 2.09 |
| GTGGGGGC | 155              | 49               | $8.43 \times 10^{-52}$  | 1.66 |
| GTGGGGGG | 200              | 64               | $8.18 \times 10^{-65}$  | 1.64 |
| TAATTC   | 70               | 22               | $1.40 \times 10^{-24}$  | 1.67 |

Continued on next page...

Table 5 – continued from previous page

| Element  | Count next to SS | Background count | Chi-square test         | LOD   |
|----------|------------------|------------------|-------------------------|-------|
| TATTCAT  | 65               | 17               | $2.53 \times 10^{-31}$  | 1.93  |
| TATTTTAT | 98               | 24               | $1.50 \times 10^{-51}$  | 2.03  |
| TATTTTCT | 85               | 27               | $6.24 \times 10^{-29}$  | 1.65  |
| TATTTTTT | 129              | 41               | $5.58 \times 10^{-43}$  | 1.65  |
| TCCGCCC  | 85               | 23               | $3.13 \times 10^{-38}$  | 1.89  |
| TCCGGGG  | 109              | 31               | $1.37 \times 10^{-44}$  | 1.81  |
| TGCGCCC  | 64               | 17               | $4.22 \times 10^{-30}$  | 1.91  |
| TGCGGGG  | 134              | 42               | $9.69 \times 10^{-46}$  | 1.67  |
| TGGCCCCG | 64               | 17               | $4.22 \times 10^{-30}$  | 1.91  |
| TGGGCCCC | 124              | 39               | $3.44 \times 10^{-42}$  | 1.67  |
| TGGGCCGG | 81               | 21               | $3.60 \times 10^{-39}$  | 1.95  |
| TGGGCGGG | 99               | 28               | $4.76 \times 10^{-41}$  | 1.82  |
| TGGGGCAC | 83               | 23               | $6.51 \times 10^{-36}$  | 1.85  |
| TGGGGCC  | 541              | 153              | $5.36 \times 10^{-216}$ | 1.82  |
| TGGGGCCA | 126              | 40               | $4.12 \times 10^{-42}$  | 1.66  |
| TGGGGCCC | 195              | 43               | $7.25 \times 10^{-119}$ | 2.18  |
| TGGGGCCG | 75               | 17               | $6.05 \times 10^{-45}$  | 2.14  |
| TGGGGCCT | 148              | 41               | $1.09 \times 10^{-62}$  | 1.85  |
| TGGGGCG  | 193              | 51               | $5.58 \times 10^{-88}$  | 1.92  |
| TGGGGCGG | 91               | 17               | $5.00 \times 10^{-72}$  | 2.42  |
| TGGGGGCC | 152              | 49               | $5.21 \times 10^{-49}$  | 1.63  |
| TGGGGGCG | 72               | 18               | $4.13 \times 10^{-37}$  | 2.00  |
| TGGGGGGC | 154              | 51               | $3.71 \times 10^{-47}$  | 1.59  |
| TTTATTC  | 101              | 33               | $2.50 \times 10^{-32}$  | 1.61  |
| TTTCTTTA | 65               | 20               | $8.10 \times 10^{-24}$  | 1.70  |
| TTTCTTTT | 175              | 54               | $6.42 \times 10^{-61}$  | 1.70  |
| TTTTAATT | 81               | 26               | $3.99 \times 10^{-27}$  | 1.64  |
| TTTTCTTA | 64               | 20               | $7.67 \times 10^{-23}$  | 1.68  |
| TTTTTAAA | 141              | 42               | $1.10 \times 10^{-52}$  | 1.75  |
| TTTTTATT | 115              | 35               | $1.15 \times 10^{-41}$  | 1.72  |
| TTTTTCCT | 70               | 20               | $5.09 \times 10^{-29}$  | 1.81  |
| TTTTTCTT | 142              | 40               | $1.63 \times 10^{-58}$  | 1.83  |
| TTTTTTA  | 258              | 82               | $3.81 \times 10^{-84}$  | 1.65  |
| TTTTTTAA | 127              | 34               | $2.87 \times 10^{-57}$  | 1.90  |
| TTTTTTCT | 114              | 32               | $1.29 \times 10^{-47}$  | 1.83  |
| TTTTTTTA | 135              | 37               | $2.13 \times 10^{-58}$  | 1.87  |
| 5'SS ISS |                  |                  |                         |       |
| AAAGGT   | 27               | 81               | $1.97 \times 10^{-09}$  | -1.58 |
| AAAGGTA  | 31               | 113              | $1.22 \times 10^{-14}$  | -1.87 |
| AAGGTA   | 101              | 383              | $4.43 \times 10^{-47}$  | -1.92 |
| AAGGTAA  | 16               | 121              | $1.35 \times 10^{-21}$  | -2.92 |
| AAGGTAG  | 27               | 91               | $1.96 \times 10^{-11}$  | -1.75 |

Continued on next page...

Table 5 – continued from previous page

| Element  | Count next to SS | Background count | Chi-square test        | LOD   |
|----------|------------------|------------------|------------------------|-------|
| AAGGTAT  | 27               | 92               | $1.23 \times 10^{-11}$ | -1.77 |
| AAGGTGA  | 43               | 149              | $3.82 \times 10^{-18}$ | -1.79 |
| AAGGTGAG | 5                | 66               | $5.97 \times 10^{-14}$ | -3.72 |
| AAGTAAG  | 24               | 115              | $2.14 \times 10^{-17}$ | -2.26 |
| AATCCCAG | 18               | 87               | $1.39 \times 10^{-13}$ | -2.27 |
| ACACACA  | 135              | 505              | $6.38 \times 10^{-61}$ | -1.90 |
| ACACACAC | 45               | 342              | $4.78 \times 10^{-58}$ | -2.93 |
| ACAGGTA  | 25               | 112              | $2.02 \times 10^{-16}$ | -2.16 |
| AGAAGAAG | 21               | 64               | $7.66 \times 10^{-08}$ | -1.61 |
| AGACAGAG | 30               | 98               | $6.46 \times 10^{-12}$ | -1.71 |
| AGACCAGC | 13               | 75               | $8.11 \times 10^{-13}$ | -2.53 |
| AGAGACAG | 29               | 96               | $8.01 \times 10^{-12}$ | -1.73 |
| AGAGAGA  | 166              | 598              | $7.39 \times 10^{-70}$ | -1.85 |
| AGAGAGAC | 20               | 64               | $3.80 \times 10^{-08}$ | -1.68 |
| AGAGAGAG | 64               | 332              | $5.61 \times 10^{-49}$ | -2.38 |
| AGAGGTA  | 32               | 96               | $6.49 \times 10^{-11}$ | -1.58 |
| AGGCAAG  | 47               | 147              | $1.61 \times 10^{-16}$ | -1.65 |
| AGGTA    | 27               | 139              | $2.10 \times 10^{-21}$ | -2.36 |
| AGGTAA   | 52               | 446              | $1.08 \times 10^{-77}$ | -3.10 |
| AGGTAAA  | 14               | 132              | $9.53 \times 10^{-25}$ | -3.24 |
| AGGTAAC  | 16               | 72               | $4.12 \times 10^{-11}$ | -2.17 |
| AGGTAAG  | 5                | 131              | $3.46 \times 10^{-28}$ | -4.71 |
| AGGTAAT  | 13               | 105              | $2.75 \times 10^{-19}$ | -3.01 |
| AGGTAC   | 69               | 233              | $6.29 \times 10^{-27}$ | -1.76 |
| AGGTACA  | 16               | 81               | $5.11 \times 10^{-13}$ | -2.34 |
| AGGTACT  | 19               | 75               | $1.00 \times 10^{-10}$ | -1.98 |
| AGGTAG   | 101              | 362              | $7.82 \times 10^{-43}$ | -1.84 |
| AGGTAGA  | 34               | 116              | $2.66 \times 10^{-14}$ | -1.77 |
| AGGTAGG  | 20               | 114              | $1.32 \times 10^{-18}$ | -2.51 |
| AGGTAGT  | 20               | 67               | $9.35 \times 10^{-09}$ | -1.74 |
| AGGTAT   | 81               | 327              | $3.75 \times 10^{-42}$ | -2.01 |
| AGGTATA  | 13               | 84               | $9.42 \times 10^{-15}$ | -2.69 |
| AGGTATG  | 10               | 92               | $1.24 \times 10^{-17}$ | -3.20 |
| AGGTATT  | 32               | 114              | $1.59 \times 10^{-14}$ | -1.83 |
| AGGTCAG  | 43               | 187              | $6.23 \times 10^{-26}$ | -2.12 |
| AGGTCAGG | 24               | 73               | $9.75 \times 10^{-09}$ | -1.60 |
| AGGTCT   | 31               | 95               | $5.15 \times 10^{-11}$ | -1.62 |
| AGGTGA   | 160              | 569              | $6.48 \times 10^{-66}$ | -1.83 |
| AGGTGAA  | 36               | 134              | $2.54 \times 10^{-17}$ | -1.90 |
| AGGTGAG  | 26               | 231              | $1.82 \times 10^{-41}$ | -3.15 |
| AGGTGAGG | 12               | 79               | $4.76 \times 10^{-14}$ | -2.72 |
| AGGTGC   | 27               | 89               | $4.96 \times 10^{-11}$ | -1.72 |

Continued on next page...

Table 5 – continued from previous page

| Element  | Count next to SS | Background count | Chi-square test        | LOD   |
|----------|------------------|------------------|------------------------|-------|
| AGGTGGG  | 16               | 75               | $9.57 \times 10^{-12}$ | -2.23 |
| AGGTTAG  | 12               | 76               | $2.11 \times 10^{-13}$ | -2.66 |
| AGTAAGT  | 30               | 126              | $1.20 \times 10^{-17}$ | -2.07 |
| AGTACAG  | 38               | 118              | $1.77 \times 10^{-13}$ | -1.63 |
| AGTAGCTG | 18               | 64               | $8.92 \times 10^{-9}$  | -1.83 |
| AGTATAG  | 26               | 78               | $3.91 \times 10^{-9}$  | -1.58 |
| AGTGCAGT | 13               | 69               | $1.57 \times 10^{-11}$ | -2.41 |
| ATAGGTA  | 22               | 66               | $6.09 \times 10^{-8}$  | -1.58 |
| ATCCCAGC | 31               | 97               | $2.06 \times 10^{-11}$ | -1.65 |
| ATGTAAG  | 31               | 107              | $2.02 \times 10^{-13}$ | -1.79 |
| CAACGA   | 21               | 67               | $1.91 \times 10^{-8}$  | -1.67 |
| CAAGGTA  | 18               | 87               | $1.39 \times 10^{-13}$ | -2.27 |
| CACACAC  | 127              | 472              | $8.51 \times 10^{-57}$ | -1.89 |
| CACACACA | 54               | 358              | $4.27 \times 10^{-58}$ | -2.73 |
| CACCACCA | 25               | 76               | $4.91 \times 10^{-9}$  | -1.60 |
| CAGAAGAG | 25               | 76               | $4.91 \times 10^{-9}$  | -1.60 |
| CAGAGAAG | 26               | 82               | $6.24 \times 10^{-10}$ | -1.66 |
| CAGAGAGA | 35               | 117              | $3.43 \times 10^{-14}$ | -1.74 |
| CAGATAG  | 29               | 94               | $2.02 \times 10^{-11}$ | -1.70 |
| CAGGAGAA | 22               | 66               | $6.09 \times 10^{-8}$  | -1.58 |
| CAGGAGTT | 12               | 75               | $3.47 \times 10^{-13}$ | -2.64 |
| CAGGTA   | 82               | 388              | $1.98 \times 10^{-54}$ | -2.24 |
| CAGGTAA  | 10               | 97               | $1.01 \times 10^{-18}$ | -3.28 |
| CAGGTAC  | 18               | 72               | $1.96 \times 10^{-10}$ | -2.00 |
| CAGGTAG  | 23               | 110              | $1.08 \times 10^{-16}$ | -2.26 |
| CAGGTAT  | 26               | 109              | $1.86 \times 10^{-15}$ | -2.07 |
| CAGGTGA  | 39               | 185              | $7.01 \times 10^{-27}$ | -2.25 |
| CAGGTGAG | 5                | 85               | $4.05 \times 10^{-18}$ | -4.09 |
| CAGTAAG  | 27               | 98               | $7.38 \times 10^{-13}$ | -1.86 |
| CCAGGTA  | 24               | 106              | $1.66 \times 10^{-15}$ | -2.14 |
| CCCAGGTT | 19               | 69               | $1.75 \times 10^{-9}$  | -1.86 |
| CCTGTAA  | 38               | 148              | $1.54 \times 10^{-19}$ | -1.96 |
| CCTGTAAT | 5                | 70               | $7.90 \times 10^{-15}$ | -3.81 |
| CGGTGAG  | 19               | 66               | $7.23 \times 10^{-9}$  | -1.80 |
| CTATCTA  | 23               | 76               | $1.20 \times 10^{-9}$  | -1.72 |
| CTGAGGCA | 23               | 86               | $1.09 \times 10^{-11}$ | -1.90 |
| CTGTAATC | 9                | 72               | $1.13 \times 10^{-13}$ | -3.00 |
| GAAGGA   | 47               | 158              | $1.04 \times 10^{-18}$ | -1.75 |
| GAAGGTA  | 24               | 86               | $2.30 \times 10^{-11}$ | -1.84 |
| GACCAGCC | 20               | 69               | $3.66 \times 10^{-9}$  | -1.79 |
| GAGAAAGA | 31               | 96               | $3.26 \times 10^{-11}$ | -1.63 |
| GAGAAGCA | 16               | 69               | $1.76 \times 10^{-10}$ | -2.11 |

Continued on next page...

Table 5 – continued from previous page

| Element  | Count next to SS | Background count | Chi-square test        | LOD   |
|----------|------------------|------------------|------------------------|-------|
| GAGACAGA | 24               | 114              | $3.47 \times 10^{-17}$ | -2.25 |
| GAGAGACA | 19               | 74               | $1.62 \times 10^{-10}$ | -1.96 |
| GAGAGAGA | 64               | 322              | $7.03 \times 10^{-47}$ | -2.33 |
| GAGATAG  | 31               | 93               | $1.28 \times 10^{-10}$ | -1.58 |
| GAGGAAGA | 27               | 81               | $1.97 \times 10^{-09}$ | -1.58 |
| GAGGTA   | 84               | 292              | $4.33 \times 10^{-34}$ | -1.80 |
| GAGGTAA  | 13               | 87               | $2.13 \times 10^{-15}$ | -2.74 |
| GAGGTAG  | 24               | 104              | $4.34 \times 10^{-15}$ | -2.12 |
| GAGGTCAG | 21               | 68               | $1.20 \times 10^{-08}$ | -1.70 |
| GAGGTGA  | 52               | 166              | $8.88 \times 10^{-19}$ | -1.67 |
| GAGTGCAG | 20               | 82               | $7.55 \times 10^{-12}$ | -2.04 |
| GATCGA   | 27               | 84               | $4.99 \times 10^{-10}$ | -1.64 |
| GCAGGTA  | 24               | 92               | $1.34 \times 10^{-12}$ | -1.94 |
| GCAGGTG  | 20               | 67               | $9.35 \times 10^{-09}$ | -1.74 |
| GCAGGTGA | 15               | 63               | $1.47 \times 10^{-09}$ | -2.07 |
| GGA CTAC | 20               | 64               | $3.80 \times 10^{-08}$ | -1.68 |
| GGAGGTA  | 23               | 87               | $6.81 \times 10^{-12}$ | -1.92 |
| GGCAAGT  | 36               | 108              | $4.26 \times 10^{-12}$ | -1.58 |
| GGCAGGT  | 17               | 67               | $1.01 \times 10^{-09}$ | -1.98 |
| GGGTAAG  | 22               | 76               | $5.85 \times 10^{-10}$ | -1.79 |
| GGTAA    | 43               | 147              | $9.65 \times 10^{-18}$ | -1.77 |
| GGTAAAG  | 30               | 106              | $1.56 \times 10^{-13}$ | -1.82 |
| GGTAAAT  | 34               | 106              | $2.68 \times 10^{-12}$ | -1.64 |
| GGTAAG   | 43               | 314              | $8.33 \times 10^{-53}$ | -2.87 |
| GGTAAGA  | 18               | 94               | $4.54 \times 10^{-15}$ | -2.38 |
| GGTAAGG  | 16               | 81               | $5.11 \times 10^{-13}$ | -2.34 |
| GGTAAGT  | 6                | 92               | $3.07 \times 10^{-19}$ | -3.94 |
| GGTAGAT  | 19               | 67               | $4.51 \times 10^{-09}$ | -1.82 |
| GGTAGGA  | 24               | 91               | $2.16 \times 10^{-12}$ | -1.92 |
| GGTAGGT  | 27               | 86               | $1.99 \times 10^{-10}$ | -1.67 |
| GGTATGT  | 20               | 86               | $1.10 \times 10^{-12}$ | -2.10 |
| GGTCAGT  | 34               | 107              | $1.70 \times 10^{-12}$ | -1.65 |
| GGTGAGC  | 44               | 134              | $7.54 \times 10^{-15}$ | -1.61 |
| GGTGAGT  | 14               | 161              | $4.87 \times 10^{-31}$ | -3.52 |
| GGTGAGTG | 4                | 67               | $1.40 \times 10^{-14}$ | -4.07 |
| GGTTAAG  | 21               | 95               | $3.14 \times 10^{-14}$ | -2.18 |
| GGTTCAA  | 40               | 131              | $1.85 \times 10^{-15}$ | -1.71 |
| GTAAG    | 36               | 170              | $8.88 \times 10^{-25}$ | -2.24 |
| GTAAGCA  | 21               | 72               | $1.85 \times 10^{-09}$ | -1.78 |
| GTAAGGA  | 23               | 94               | $2.42 \times 10^{-13}$ | -2.03 |
| GTAAGT   | 81               | 369              | $8.05 \times 10^{-51}$ | -2.19 |
| GTAAGTA  | 12               | 98               | $3.71 \times 10^{-18}$ | -3.03 |

Continued on next page...

Table 5 – continued from previous page

| Element  | Count next to SS | Background count | Chi-square test        | LOD   |
|----------|------------------|------------------|------------------------|-------|
| GTAAGTC  | 16               | 65               | $1.22 \times 10^{-09}$ | -2.02 |
| GTAAGTG  | 25               | 116              | $2.93 \times 10^{-17}$ | -2.21 |
| GTAAGTT  | 23               | 101              | $8.40 \times 10^{-15}$ | -2.13 |
| GTAATCC  | 20               | 87               | $6.81 \times 10^{-13}$ | -2.12 |
| GTAGAAC  | 17               | 69               | $3.85 \times 10^{-10}$ | -2.02 |
| GTAGGTA  | 14               | 65               | $2.52 \times 10^{-10}$ | -2.22 |
| GTGAAG   | 38               | 116              | $4.41 \times 10^{-13}$ | -1.61 |
| GTGAGT   | 14               | 90               | $1.14 \times 10^{-15}$ | -2.68 |
| GTGAGTA  | 23               | 91               | $1.01 \times 10^{-12}$ | -1.98 |
| GTGCAA   | 22               | 73               | $2.38 \times 10^{-09}$ | -1.73 |
| GTGGCTCA | 18               | 87               | $1.39 \times 10^{-13}$ | -2.27 |
| GTTAGTA  | 21               | 68               | $1.20 \times 10^{-08}$ | -1.70 |
| TAAGCAC  | 28               | 97               | $2.45 \times 10^{-12}$ | -1.79 |
| TAAGCG   | 26               | 78               | $3.91 \times 10^{-09}$ | -1.58 |
| TAAGGTA  | 15               | 72               | $1.85 \times 10^{-11}$ | -2.26 |
| TAAGTGC  | 28               | 89               | $1.01 \times 10^{-10}$ | -1.67 |
| TAATCCC  | 30               | 143              | $3.39 \times 10^{-21}$ | -2.25 |
| TAATCCCA | 6                | 92               | $3.07 \times 10^{-19}$ | -3.94 |
| TACAGATG | 21               | 67               | $1.91 \times 10^{-08}$ | -1.67 |
| TAGATAG  | 27               | 82               | $1.25 \times 10^{-09}$ | -1.60 |
| TAGATGA  | 33               | 113              | $5.23 \times 10^{-14}$ | -1.78 |
| TAGCTGGG | 19               | 66               | $7.23 \times 10^{-09}$ | -1.80 |
| TAGGACT  | 21               | 69               | $7.53 \times 10^{-09}$ | -1.72 |
| TAGGTA   | 65               | 261              | $7.08 \times 10^{-34}$ | -2.01 |
| TAGGTAA  | 9                | 77               | $9.23 \times 10^{-15}$ | -3.10 |
| TAGGTAG  | 17               | 67               | $1.01 \times 10^{-09}$ | -1.98 |
| TAGGTAT  | 19               | 76               | $6.22 \times 10^{-11}$ | -2.00 |
| TAGGTCA  | 19               | 64               | $1.85 \times 10^{-08}$ | -1.75 |
| TAGGTGA  | 24               | 80               | $3.82 \times 10^{-10}$ | -1.74 |
| TAGGTTG  | 21               | 64               | $7.66 \times 10^{-08}$ | -1.61 |
| TAGTAAG  | 23               | 75               | $1.92 \times 10^{-09}$ | -1.71 |
| TAGTTAG  | 24               | 72               | $1.54 \times 10^{-08}$ | -1.58 |
| TAGTTGC  | 20               | 67               | $9.35 \times 10^{-09}$ | -1.74 |
| TCAGGTA  | 23               | 101              | $8.40 \times 10^{-15}$ | -2.13 |
| TCTCTCTC | 92               | 308              | $8.15 \times 10^{-35}$ | -1.74 |
| TCTGTAAA | 28               | 90               | $6.34 \times 10^{-11}$ | -1.68 |
| TGAGGTA  | 27               | 102              | $1.12 \times 10^{-13}$ | -1.92 |
| TGGAGTGC | 19               | 66               | $7.23 \times 10^{-09}$ | -1.80 |
| TGGTAAG  | 12               | 104              | $1.85 \times 10^{-19}$ | -3.12 |
| TGTAAGT  | 28               | 139              | $4.72 \times 10^{-21}$ | -2.31 |
| TGTAATCC | 5                | 68               | $2.17 \times 10^{-14}$ | -3.77 |
| TTAGGTA  | 22               | 82               | $3.45 \times 10^{-11}$ | -1.90 |

Continued on next page...

Table 5 – continued from previous page

| Element   | Count next to SS | Background count | Chi-square test         | LOD   |
|-----------|------------------|------------------|-------------------------|-------|
| TTTGAGAC  | 19               | 91               | $4.43 \times 10^{-14}$  | -2.26 |
| 3'SS ISE  |                  |                  |                         |       |
| AAAACCTAA | 134              | 41               | $8.50 \times 10^{-48}$  | 1.71  |
| AAAATGTT  | 69               | 18               | $2.76 \times 10^{-33}$  | 1.94  |
| AAACTAAC  | 72               | 11               | $1.52 \times 10^{-75}$  | 2.71  |
| AAACTAAT  | 132              | 26               | $5.51 \times 10^{-96}$  | 2.34  |
| AAACTGAC  | 67               | 21               | $1.04 \times 10^{-23}$  | 1.67  |
| AAATGACC  | 64               | 20               | $7.67 \times 10^{-23}$  | 1.68  |
| AAATTAAT  | 169              | 56               | $1.61 \times 10^{-51}$  | 1.59  |
| AACACTAA  | 70               | 15               | $9.03 \times 10^{-46}$  | 2.22  |
| AACTAAAA  | 88               | 26               | $5.12 \times 10^{-34}$  | 1.76  |
| AACTAAC   | 189              | 36               | $1.96 \times 10^{-143}$ | 2.39  |
| AACTAACA  | 69               | 14               | $6.50 \times 10^{-49}$  | 2.30  |
| AACTAACT  | 69               | 14               | $6.50 \times 10^{-49}$  | 2.30  |
| AACTAAT   | 269              | 78               | $1.00 \times 10^{-103}$ | 1.79  |
| AACTAATG  | 76               | 15               | $6.85 \times 10^{-56}$  | 2.34  |
| AACTAATT  | 92               | 24               | $8.31 \times 10^{-44}$  | 1.94  |
| AACTGAC   | 195              | 54               | $4.67 \times 10^{-82}$  | 1.85  |
| AACTTTTT  | 75               | 24               | $2.22 \times 10^{-25}$  | 1.64  |
| AATAACAT  | 98               | 30               | $2.16 \times 10^{-35}$  | 1.71  |
| AATACTAA  | 88               | 19               | $1.94 \times 10^{-56}$  | 2.21  |
| AATACTGA  | 80               | 25               | $3.82 \times 10^{-28}$  | 1.68  |
| AATCTAAT  | 92               | 30               | $1.05 \times 10^{-29}$  | 1.62  |
| AATGCTAA  | 89               | 24               | $3.54 \times 10^{-40}$  | 1.89  |
| AATGTAAC  | 66               | 18               | $1.12 \times 10^{-29}$  | 1.87  |
| AATTAAC   | 236              | 69               | $6.71 \times 10^{-90}$  | 1.77  |
| AATTAACA  | 79               | 24               | $3.01 \times 10^{-29}$  | 1.72  |
| AATTAACT  | 84               | 26               | $5.58 \times 10^{-30}$  | 1.69  |
| AATTCTAA  | 100              | 32               | $2.76 \times 10^{-33}$  | 1.64  |
| ACAAAAT   | 69               | 21               | $1.13 \times 10^{-25}$  | 1.72  |
| ACACTAA   | 178              | 50               | $3.07 \times 10^{-73}$  | 1.83  |
| ACACTAAT  | 64               | 18               | $2.17 \times 10^{-27}$  | 1.83  |
| ACACTCAC  | 72               | 18               | $4.13 \times 10^{-37}$  | 2.00  |
| ACACTGAC  | 72               | 16               | $1.56 \times 10^{-44}$  | 2.17  |
| ACATTGT   | 69               | 22               | $1.24 \times 10^{-23}$  | 1.65  |
| ACCCTCAC  | 87               | 19               | $7.24 \times 10^{-55}$  | 2.20  |
| ACCCTCTC  | 70               | 20               | $5.09 \times 10^{-29}$  | 1.81  |
| ACCCTGAC  | 97               | 27               | $2.30 \times 10^{-41}$  | 1.85  |
| ACCTAAC   | 117              | 36               | $1.56 \times 10^{-41}$  | 1.70  |
| ACCTCACC  | 80               | 16               | $1.28 \times 10^{-57}$  | 2.32  |
| ACCTCACT  | 83               | 22               | $1.14 \times 10^{-38}$  | 1.92  |
| ACCTGAC   | 213              | 64               | $2.01 \times 10^{-77}$  | 1.73  |

Continued on next page...



Table 5 – continued from previous page

| Element  | Count next to SS | Background count | Chi-square test         | LOD  |
|----------|------------------|------------------|-------------------------|------|
| ACCTGACC | 78               | 22               | $7.38 \times 10^{-33}$  | 1.83 |
| ACCTGACT | 67               | 19               | $3.34 \times 10^{-28}$  | 1.82 |
| ACGCTGA  | 73               | 19               | $3.02 \times 10^{-35}$  | 1.94 |
| ACTAAATT | 68               | 21               | $1.11 \times 10^{-24}$  | 1.70 |
| ACTAAC   | 571              | 134              | 0.00                    | 2.09 |
| ACTAACA  | 187              | 48               | $1.55 \times 10^{-89}$  | 1.96 |
| ACTAACAT | 74               | 14               | $7.19 \times 10^{-58}$  | 2.40 |
| ACTAACCC | 182              | 35               | $2.74 \times 10^{-136}$ | 2.38 |
| ACTAACCT | 68               | 13               | $1.54 \times 10^{-52}$  | 2.39 |
| ACTAACG  | 64               | 7                | $6.03 \times 10^{-103}$ | 3.19 |
| ACTAACT  | 178              | 43               | $3.55 \times 10^{-94}$  | 2.05 |
| ACTAACTT | 78               | 14               | $1.37 \times 10^{-65}$  | 2.48 |
| ACTAAT   | 835              | 243              | 0.00                    | 1.78 |
| ACTAATAT | 76               | 22               | $1.14 \times 10^{-30}$  | 1.79 |
| ACTAATC  | 139              | 35               | $3.55 \times 10^{-69}$  | 1.99 |
| ACTAATG  | 241              | 58               | $1.37 \times 10^{-127}$ | 2.05 |
| ACTAATGA | 64               | 14               | $9.93 \times 10^{-41}$  | 2.19 |
| ACTAATGT | 89               | 17               | $2.76 \times 10^{-68}$  | 2.39 |
| ACTAATT  | 276              | 81               | $4.20 \times 10^{-104}$ | 1.77 |
| ACTAATTA | 64               | 19               | $5.50 \times 10^{-25}$  | 1.75 |
| ACTAATTT | 129              | 36               | $3.46 \times 10^{-54}$  | 1.84 |
| ACTCACC  | 213              | 54               | $7.99 \times 10^{-104}$ | 1.98 |
| ACTCACCC | 70               | 16               | $1.56 \times 10^{-41}$  | 2.13 |
| ACTCACCT | 83               | 22               | $1.14 \times 10^{-38}$  | 1.92 |
| ACTCACTC | 66               | 13               | $6.48 \times 10^{-49}$  | 2.34 |
| ACTCTAAT | 64               | 15               | $1.09 \times 10^{-36}$  | 2.09 |
| ACTCTGAC | 72               | 21               | $9.05 \times 10^{-29}$  | 1.78 |
| ACTGAC   | 879              | 244              | 0.00                    | 1.85 |
| ACTGACAT | 74               | 20               | $1.43 \times 10^{-33}$  | 1.89 |
| ACTGACC  | 308              | 66               | $5.49 \times 10^{-195}$ | 2.22 |
| ACTGACCA | 81               | 24               | $2.73 \times 10^{-31}$  | 1.75 |
| ACTGACCC | 114              | 19               | $2.61 \times 10^{-105}$ | 2.58 |
| ACTGACCT | 98               | 25               | $2.81 \times 10^{-48}$  | 1.97 |
| ACTGACG  | 69               | 10               | $1.10 \times 10^{-77}$  | 2.79 |
| ACTGACT  | 298              | 93               | $2.78 \times 10^{-100}$ | 1.68 |
| ACTGACTC | 64               | 19               | $5.50 \times 10^{-25}$  | 1.75 |
| ACTGACTG | 94               | 30               | $1.52 \times 10^{-31}$  | 1.65 |
| ACTGACTT | 100              | 27               | $7.82 \times 10^{-45}$  | 1.89 |
| ACTGATC  | 147              | 42               | $4.88 \times 10^{-59}$  | 1.81 |
| ACTGATTT | 128              | 37               | $1.33 \times 10^{-50}$  | 1.79 |
| ACTTACAT | 65               | 20               | $8.10 \times 10^{-24}$  | 1.70 |
| AGACTGAC | 74               | 18               | $8.85 \times 10^{-40}$  | 2.04 |

Continued on next page...

Table 5 – continued from previous page

| Element  | Count next to SS | Background count | Chi-square test        | LOD  |
|----------|------------------|------------------|------------------------|------|
| AGCCCCTC | 95               | 30               | $1.75 \times 10^{-32}$ | 1.66 |
| AGCCCTGA | 139              | 40               | $3.15 \times 10^{-55}$ | 1.80 |
| AGCCTCAC | 83               | 24               | $2.10 \times 10^{-33}$ | 1.79 |
| AGCCTGAC | 96               | 26               | $6.88 \times 10^{-43}$ | 1.88 |
| AGCTAAC  | 129              | 40               | $5.62 \times 10^{-45}$ | 1.69 |
| AGCTCACC | 66               | 20               | $8.15 \times 10^{-25}$ | 1.72 |
| AGCTCACT | 65               | 20               | $8.10 \times 10^{-24}$ | 1.70 |
| AGCTGAC  | 257              | 79               | $3.21 \times 10^{-89}$ | 1.70 |
| AGCTGACC | 95               | 19               | $4.42 \times 10^{-68}$ | 2.32 |
| AGCTGACT | 83               | 19               | $8.33 \times 10^{-49}$ | 2.13 |
| AGGCCTCA | 81               | 26               | $3.99 \times 10^{-27}$ | 1.64 |
| AGGCTCAC | 65               | 19               | $4.91 \times 10^{-26}$ | 1.77 |
| AGGCTGAC | 95               | 21               | $1.17 \times 10^{-58}$ | 2.18 |
| AGTAACC  | 140              | 44               | $1.80 \times 10^{-47}$ | 1.67 |
| AGTAACTT | 86               | 26               | $5.77 \times 10^{-32}$ | 1.73 |
| ATAACATT | 104              | 34               | $3.35 \times 10^{-33}$ | 1.61 |
| ATAACTAA | 84               | 20               | $1.87 \times 10^{-46}$ | 2.07 |
| ATAACTGA | 71               | 22               | $1.51 \times 10^{-25}$ | 1.69 |
| ATACTAA  | 245              | 69               | $1.23 \times 10^{-99}$ | 1.83 |
| ATACTAAT | 81               | 14               | $1.05 \times 10^{-71}$ | 2.53 |
| ATACTGAT | 71               | 21               | $1.02 \times 10^{-27}$ | 1.76 |
| ATACTTAA | 75               | 19               | $8.90 \times 10^{-38}$ | 1.98 |
| ATACTTT  | 79               | 22               | $5.56 \times 10^{-34}$ | 1.84 |
| ATATTAAC | 86               | 20               | $2.73 \times 10^{-49}$ | 2.10 |
| ATATTAT  | 72               | 23               | $1.66 \times 10^{-24}$ | 1.65 |
| ATATTTTT | 91               | 29               | $1.13 \times 10^{-30}$ | 1.65 |
| ATCTAAC  | 138              | 35               | $6.89 \times 10^{-68}$ | 1.98 |
| ATCTAATG | 75               | 19               | $8.90 \times 10^{-38}$ | 1.98 |
| ATGACTAA | 67               | 21               | $1.04 \times 10^{-23}$ | 1.67 |
| ATGACTGA | 76               | 23               | $2.16 \times 10^{-28}$ | 1.72 |
| ATGCTAA  | 254              | 74               | $3.18 \times 10^{-97}$ | 1.78 |
| ATGCTAAC | 76               | 13               | $2.30 \times 10^{-68}$ | 2.55 |
| ATGCTAAT | 91               | 22               | $5.49 \times 10^{-49}$ | 2.05 |
| ATGCTCAC | 72               | 12               | $3.29 \times 10^{-67}$ | 2.58 |
| ATGCTCAT | 68               | 18               | $4.66 \times 10^{-32}$ | 1.92 |
| ATGCTGAC | 95               | 19               | $4.42 \times 10^{-68}$ | 2.32 |
| ATGCTGAT | 84               | 23               | $4.61 \times 10^{-37}$ | 1.87 |
| ATGTTAAC | 67               | 17               | $7.61 \times 10^{-34}$ | 1.98 |
| ATTAACAT | 87               | 28               | $7.16 \times 10^{-29}$ | 1.64 |
| ATTAACC  | 159              | 48               | $9.02 \times 10^{-58}$ | 1.73 |
| ATTAACT  | 263              | 85               | $4.68 \times 10^{-83}$ | 1.63 |
| ATTAACTG | 74               | 15               | $2.11 \times 10^{-52}$ | 2.30 |

Continued on next page...

Table 5 – continued from previous page

| Element   | Count next to SS | Background count | Chi-square test         | LOD  |
|-----------|------------------|------------------|-------------------------|------|
| ATTAACCTT | 102              | 27               | $3.17 \times 10^{-47}$  | 1.92 |
| ATTAATCT  | 76               | 24               | $2.55 \times 10^{-26}$  | 1.66 |
| ATTAATGA  | 84               | 27               | $5.34 \times 10^{-28}$  | 1.64 |
| ATTAATTT  | 198              | 63               | $7.09 \times 10^{-65}$  | 1.65 |
| ATTACTAA  | 76               | 24               | $2.55 \times 10^{-26}$  | 1.66 |
| ATTATTG   | 74               | 24               | $1.86 \times 10^{-24}$  | 1.62 |
| ATTCTAAC  | 74               | 19               | $1.68 \times 10^{-36}$  | 1.96 |
| ATTCTAAT  | 117              | 34               | $5.60 \times 10^{-46}$  | 1.78 |
| ATTCTCAC  | 70               | 16               | $1.56 \times 10^{-41}$  | 2.13 |
| ATTCTGAC  | 72               | 19               | $5.13 \times 10^{-34}$  | 1.92 |
| ATTGCTAA  | 69               | 22               | $1.24 \times 10^{-23}$  | 1.65 |
| ATTGTAT   | 64               | 20               | $7.67 \times 10^{-23}$  | 1.68 |
| ATTTTATT  | 103              | 32               | $3.91 \times 10^{-36}$  | 1.69 |
| CACCCCTC  | 92               | 27               | $6.64 \times 10^{-36}$  | 1.77 |
| CACCCTGA  | 99               | 27               | $1.16 \times 10^{-43}$  | 1.87 |
| CACCTCAC  | 85               | 21               | $2.51 \times 10^{-44}$  | 2.02 |
| CACCTGAC  | 83               | 20               | $4.55 \times 10^{-45}$  | 2.05 |
| CACTAAC   | 187              | 30               | $1.06 \times 10^{-180}$ | 2.64 |
| CACTAACA  | 66               | 10               | $3.59 \times 10^{-70}$  | 2.72 |
| CACTAAT   | 202              | 53               | $4.24 \times 10^{-93}$  | 1.93 |
| CACTAATG  | 67               | 10               | $1.24 \times 10^{-72}$  | 2.74 |
| CACTCAC   | 284              | 81               | $1.17 \times 10^{-112}$ | 1.81 |
| CACTCACC  | 98               | 18               | $2.61 \times 10^{-79}$  | 2.44 |
| CACTCACT  | 103              | 27               | $1.91 \times 10^{-48}$  | 1.93 |
| CACTGAC   | 364              | 77               | $1.23 \times 10^{-234}$ | 2.24 |
| CACTGACA  | 92               | 19               | $5.91 \times 10^{-63}$  | 2.28 |
| CACTGACC  | 169              | 28               | $1.96 \times 10^{-156}$ | 2.59 |
| CACTGACT  | 119              | 26               | $2.53 \times 10^{-74}$  | 2.19 |
| CACTGAT   | 249              | 79               | $1.51 \times 10^{-81}$  | 1.66 |
| CACTGATG  | 85               | 26               | $5.79 \times 10^{-31}$  | 1.71 |
| CACTGATT  | 75               | 24               | $2.22 \times 10^{-25}$  | 1.64 |
| CAGCTCAC  | 84               | 23               | $4.61 \times 10^{-37}$  | 1.87 |
| CAGCTGAC  | 101              | 21               | $3.02 \times 10^{-68}$  | 2.27 |
| CAGTGACC  | 92               | 27               | $6.64 \times 10^{-36}$  | 1.77 |
| CATACTAA  | 65               | 17               | $2.53 \times 10^{-31}$  | 1.93 |
| CATCTCAC  | 65               | 18               | $1.60 \times 10^{-28}$  | 1.85 |
| CATCTCAT  | 82               | 25               | $4.18 \times 10^{-30}$  | 1.71 |
| CATCTGAC  | 69               | 17               | $1.82 \times 10^{-36}$  | 2.02 |
| CATGCTGA  | 68               | 20               | $7.11 \times 10^{-27}$  | 1.77 |
| CATTAAC   | 186              | 57               | $1.87 \times 10^{-65}$  | 1.71 |
| CATTAACA  | 67               | 20               | $7.81 \times 10^{-26}$  | 1.74 |
| CATTAACT  | 65               | 18               | $1.60 \times 10^{-28}$  | 1.85 |

Continued on next page...

Table 5 – continued from previous page

| Element  | Count next to SS | Background count | Chi-square test         | LOD  |
|----------|------------------|------------------|-------------------------|------|
| CATTAATG | 78               | 21               | $1.62 \times 10^{-35}$  | 1.89 |
| CCACCTGA | 72               | 18               | $4.13 \times 10^{-37}$  | 2.00 |
| CCACTCAC | 104              | 18               | $2.34 \times 10^{-91}$  | 2.53 |
| CCACTGAC | 125              | 15               | $1.91 \times 10^{-177}$ | 3.06 |
| CCACTGAT | 74               | 20               | $1.43 \times 10^{-33}$  | 1.89 |
| CCAGCTGA | 92               | 30               | $1.05 \times 10^{-29}$  | 1.62 |
| CCCAACCT | 64               | 19               | $5.50 \times 10^{-25}$  | 1.75 |
| CCCACTCA | 106              | 21               | $8.37 \times 10^{-77}$  | 2.34 |
| CCCACTGA | 112              | 28               | $9.50 \times 10^{-57}$  | 2.00 |
| CCCCACTC | 109              | 36               | $4.67 \times 10^{-34}$  | 1.60 |
| CCCCACTT | 70               | 23               | $1.12 \times 10^{-22}$  | 1.61 |
| CCCCCCTC | 107              | 30               | $6.85 \times 10^{-45}$  | 1.83 |
| CCCCCTCA | 99               | 26               | $1.72 \times 10^{-46}$  | 1.93 |
| CCCCCTGA | 119              | 22               | $5.18 \times 10^{-95}$  | 2.44 |
| CCCCTCAC | 192              | 33               | $1.27 \times 10^{-168}$ | 2.54 |
| CCCCTGAC | 175              | 32               | $5.40 \times 10^{-141}$ | 2.45 |
| CCCTAAC  | 218              | 49               | $8.82 \times 10^{-129}$ | 2.15 |
| CCCTAACC | 88               | 15               | $3.02 \times 10^{-79}$  | 2.55 |
| CCCTCAC  | 442              | 100              | $2.36 \times 10^{-256}$ | 2.14 |
| CCCTCACA | 72               | 20               | $2.98 \times 10^{-31}$  | 1.85 |
| CCCTCACC | 193              | 41               | $1.44 \times 10^{-124}$ | 2.23 |
| CCCTCACT | 141              | 22               | $5.27 \times 10^{-142}$ | 2.68 |
| CCCTCTCA | 90               | 26               | $3.90 \times 10^{-36}$  | 1.79 |
| CCCTCTGA | 123              | 33               | $2.54 \times 10^{-55}$  | 1.90 |
| CCCTGAC  | 516              | 116              | $6.36 \times 10^{-302}$ | 2.15 |
| CCCTGACA | 95               | 23               | $6.03 \times 10^{-51}$  | 2.05 |
| CCCTGACC | 241              | 45               | $1.14 \times 10^{-187}$ | 2.42 |
| CCCTGACT | 154              | 32               | $3.67 \times 10^{-103}$ | 2.27 |
| CCCTGAT  | 236              | 74               | $4.10 \times 10^{-79}$  | 1.67 |
| CCCTGATC | 72               | 14               | $3.40 \times 10^{-54}$  | 2.36 |
| CCCTGATG | 89               | 22               | $2.73 \times 10^{-46}$  | 2.02 |
| CCGCTCA  | 96               | 22               | $4.48 \times 10^{-56}$  | 2.13 |
| CCGCTGA  | 134              | 31               | $2.09 \times 10^{-76}$  | 2.11 |
| CCGCTGAC | 82               | 9                | $8.69 \times 10^{-131}$ | 3.19 |
| CCGTGAC  | 92               | 24               | $8.31 \times 10^{-44}$  | 1.94 |
| CCTAAC   | 612              | 171              | $2.46 \times 10^{-249}$ | 1.84 |
| CCTAACA  | 164              | 46               | $8.50 \times 10^{-68}$  | 1.83 |
| CCTAACC  | 198              | 50               | $2.82 \times 10^{-97}$  | 1.99 |
| CCTAACCC | 77               | 13               | $1.71 \times 10^{-70}$  | 2.57 |
| CCTAACG  | 64               | 11               | $1.76 \times 10^{-57}$  | 2.54 |
| CCTAACT  | 224              | 64               | $5.48 \times 10^{-89}$  | 1.81 |
| CCTAACTG | 71               | 22               | $1.51 \times 10^{-25}$  | 1.69 |

Continued on next page...

Table 5 – continued from previous page

| Element  | Count next to SS | Background count | Chi-square test         | LOD  |
|----------|------------------|------------------|-------------------------|------|
| CCTAACTT | 64               | 15               | $1.09 \times 10^{-36}$  | 2.09 |
| CCTAATC  | 104              | 33               | $4.32 \times 10^{-35}$  | 1.66 |
| CCTAATG  | 191              | 56               | $9.39 \times 10^{-73}$  | 1.77 |
| CCTCAC   | 1209             | 383              | 0.00                    | 1.66 |
| CCTCACC  | 477              | 130              | $1.91 \times 10^{-203}$ | 1.88 |
| CCTCACCA | 95               | 28               | $9.62 \times 10^{-37}$  | 1.76 |
| CCTCACCC | 190              | 49               | $3.10 \times 10^{-90}$  | 1.96 |
| CCTCACCT | 160              | 36               | $6.89 \times 10^{-95}$  | 2.15 |
| CCTCACG  | 113              | 27               | $1.58 \times 10^{-61}$  | 2.07 |
| CCTCACT  | 412              | 112              | $8.85 \times 10^{-177}$ | 1.88 |
| CCTCACTC | 123              | 23               | $1.48 \times 10^{-96}$  | 2.42 |
| CCTCACTG | 164              | 47               | $2.64 \times 10^{-65}$  | 1.80 |
| CCTCACTT | 93               | 27               | $5.78 \times 10^{-37}$  | 1.78 |
| CCTCCTAA | 68               | 16               | $1.22 \times 10^{-38}$  | 2.09 |
| CCTCTAA  | 227              | 61               | $3.00 \times 10^{-100}$ | 1.90 |
| CCTCTAAC | 74               | 8                | $1.98 \times 10^{-120}$ | 3.21 |
| CCTCTAAT | 64               | 13               | $2.01 \times 10^{-45}$  | 2.30 |
| CCTCTCAC | 132              | 22               | $1.26 \times 10^{-121}$ | 2.58 |
| CCTCTCAT | 78               | 19               | $9.64 \times 10^{-42}$  | 2.04 |
| CCTCTGAC | 184              | 33               | $2.78 \times 10^{-152}$ | 2.48 |
| CCTCTGAT | 74               | 23               | $2.06 \times 10^{-26}$  | 1.69 |
| CCTGAC   | 1284             | 397              | 0.00                    | 1.69 |
| CCTGACAC | 75               | 22               | $1.32 \times 10^{-29}$  | 1.77 |
| CCTGACC  | 530              | 152              | $1.89 \times 10^{-206}$ | 1.80 |
| CCTGACCA | 102              | 30               | $1.81 \times 10^{-39}$  | 1.77 |
| CCTGACCC | 212              | 47               | $5.41 \times 10^{-128}$ | 2.17 |
| CCTGACG  | 129              | 28               | $3.22 \times 10^{-81}$  | 2.20 |
| CCTGACT  | 407              | 119              | $1.31 \times 10^{-153}$ | 1.77 |
| CCTGACTC | 150              | 34               | $4.59 \times 10^{-88}$  | 2.14 |
| CCTGACTG | 121              | 29               | $1.95 \times 10^{-65}$  | 2.06 |
| CCTGCTCA | 138              | 35               | $6.89 \times 10^{-68}$  | 1.98 |
| CCTGTGAC | 99               | 17               | $5.17 \times 10^{-88}$  | 2.54 |
| CCTTCTAA | 80               | 23               | $1.41 \times 10^{-32}$  | 1.80 |
| CCTTCTGA | 101              | 32               | $3.20 \times 10^{-34}$  | 1.66 |
| CCTTGACC | 77               | 21               | $2.42 \times 10^{-34}$  | 1.87 |
| CCTTGACT | 68               | 22               | $1.05 \times 10^{-22}$  | 1.63 |
| CCTTTTTT | 106              | 35               | $3.50 \times 10^{-33}$  | 1.60 |
| CGCTAA   | 129              | 35               | $7.55 \times 10^{-57}$  | 1.88 |
| CGCTCAC  | 125              | 24               | $1.95 \times 10^{-94}$  | 2.38 |
| CGCTGA   | 310              | 92               | $2.34 \times 10^{-114}$ | 1.75 |
| CGCTGAC  | 150              | 22               | $5.60 \times 10^{-164}$ | 2.77 |
| CGCTGACC | 72               | 6                | $6.63 \times 10^{-160}$ | 3.58 |

Continued on next page...

Table 5 – continued from previous page

| Element   | Count next to SS | Background count | Chi-square test         | LOD  |
|-----------|------------------|------------------|-------------------------|------|
| CGGGGAGG  | 69               | 21               | $1.13 \times 10^{-25}$  | 1.72 |
| CGGGGTGG  | 65               | 18               | $1.60 \times 10^{-28}$  | 1.85 |
| CGGTGAC   | 73               | 19               | $3.02 \times 10^{-35}$  | 1.94 |
| CGTGACC   | 93               | 23               | $2.97 \times 10^{-48}$  | 2.02 |
| CGTTCTC   | 69               | 18               | $2.76 \times 10^{-33}$  | 1.94 |
| CTAAACTT  | 65               | 15               | $3.95 \times 10^{-38}$  | 2.12 |
| CTAAC     | 2191             | 643              | 0.00                    | 1.77 |
| CTAACA    | 667              | 210              | $2.67 \times 10^{-218}$ | 1.67 |
| CTAACAC   | 151              | 42               | $1.76 \times 10^{-63}$  | 1.85 |
| CTAACAG   | 149              | 47               | $4.55 \times 10^{-50}$  | 1.66 |
| CTAACAT   | 219              | 56               | $3.43 \times 10^{-105}$ | 1.97 |
| CTAACATG  | 67               | 8                | $1.24 \times 10^{-96}$  | 3.07 |
| CTAACATT  | 81               | 20               | $2.31 \times 10^{-42}$  | 2.02 |
| CTAACC    | 659              | 179              | $6.67 \times 10^{-282}$ | 1.88 |
| CTAACCA   | 185              | 53               | $1.79 \times 10^{-73}$  | 1.80 |
| CTAACCAT  | 66               | 11               | $9.22 \times 10^{-62}$  | 2.58 |
| CTAACCC   | 216              | 44               | $3.04 \times 10^{-148}$ | 2.30 |
| CTAACCCCT | 86               | 14               | $1.62 \times 10^{-82}$  | 2.62 |
| CTAACCT   | 217              | 58               | $8.49 \times 10^{-97}$  | 1.90 |
| CTAACCTC  | 71               | 10               | $6.53 \times 10^{-83}$  | 2.83 |
| CTAACCTG  | 68               | 22               | $1.05 \times 10^{-22}$  | 1.63 |
| CTAACCTT  | 75               | 20               | $9.24 \times 10^{-35}$  | 1.91 |
| CTAACG    | 186              | 33               | $2.74 \times 10^{-156}$ | 2.49 |
| CTAACGC   | 65               | 7                | $1.60 \times 10^{-106}$ | 3.22 |
| CTAACGT   | 71               | 12               | $4.77 \times 10^{-65}$  | 2.56 |
| CTAACT    | 734              | 219              | $2.26 \times 10^{-265}$ | 1.74 |
| CTAACTC   | 191              | 55               | $4.08 \times 10^{-75}$  | 1.80 |
| CTAACTCT  | 88               | 19               | $1.94 \times 10^{-56}$  | 2.21 |
| CTAACTG   | 224              | 58               | $2.47 \times 10^{-105}$ | 1.95 |
| CTAACTGA  | 64               | 12               | $6.21 \times 10^{-51}$  | 2.42 |
| CTAACTGT  | 70               | 10               | $2.81 \times 10^{-80}$  | 2.81 |
| CTAACTT   | 249              | 64               | $2.58 \times 10^{-118}$ | 1.96 |
| CTAACTTT  | 112              | 24               | $3.80 \times 10^{-72}$  | 2.22 |
| CTAATAAT  | 91               | 24               | $1.41 \times 10^{-42}$  | 1.92 |
| CTAATATT  | 96               | 31               | $1.72 \times 10^{-31}$  | 1.63 |
| CTAATCTT  | 76               | 18               | $1.52 \times 10^{-42}$  | 2.08 |
| CTAATG    | 773              | 253              | $1.91 \times 10^{-234}$ | 1.61 |
| CTAATGAT  | 65               | 18               | $1.60 \times 10^{-28}$  | 1.85 |
| CTAATGC   | 174              | 48               | $6.58 \times 10^{-74}$  | 1.86 |
| CTAATGCT  | 78               | 22               | $7.38 \times 10^{-33}$  | 1.83 |
| CTAATGT   | 251              | 72               | $8.71 \times 10^{-99}$  | 1.80 |
| CTAATGTG  | 66               | 20               | $8.15 \times 10^{-25}$  | 1.72 |

Continued on next page...

Table 5 – continued from previous page

| Element   | Count next to SS | Background count | Chi-square test         | LOD  |
|-----------|------------------|------------------|-------------------------|------|
| CTAATGTT  | 95               | 23               | $6.03 \times 10^{-51}$  | 2.05 |
| CTAATTCT  | 98               | 27               | $1.66 \times 10^{-42}$  | 1.86 |
| CTAATTGT  | 76               | 19               | $4.47 \times 10^{-39}$  | 2.00 |
| CTATTAAT  | 66               | 17               | $1.43 \times 10^{-32}$  | 1.96 |
| CTCACACC  | 78               | 22               | $7.38 \times 10^{-33}$  | 1.83 |
| CTCACC    | 1177             | 372              | 0.00                    | 1.66 |
| CTCACACC  | 78               | 21               | $1.62 \times 10^{-35}$  | 1.89 |
| CTCACCAT  | 64               | 15               | $1.09 \times 10^{-36}$  | 2.09 |
| CTCACCC   | 419              | 133              | $8.95 \times 10^{-136}$ | 1.66 |
| CTCACCCC  | 135              | 36               | $3.66 \times 10^{-61}$  | 1.91 |
| CTCACCCCT | 147              | 37               | $4.26 \times 10^{-73}$  | 1.99 |
| CTCACCCG  | 103              | 24               | $1.68 \times 10^{-58}$  | 2.10 |
| CTCACCT   | 428              | 120              | $6.05 \times 10^{-174}$ | 1.83 |
| CTCACCTC  | 144              | 37               | $2.90 \times 10^{-69}$  | 1.96 |
| CTCACCTG  | 158              | 40               | $1.10 \times 10^{-77}$  | 1.98 |
| CTCACCTT  | 111              | 29               | $2.34 \times 10^{-52}$  | 1.94 |
| CTCACG    | 301              | 92               | $2.87 \times 10^{-105}$ | 1.71 |
| CTCACGC   | 109              | 20               | $3.98 \times 10^{-88}$  | 2.45 |
| CTCACGT   | 80               | 23               | $1.41 \times 10^{-32}$  | 1.80 |
| CTCACTC   | 329              | 98               | $1.96 \times 10^{-120}$ | 1.75 |
| CTCACTCA  | 109              | 20               | $3.98 \times 10^{-88}$  | 2.45 |
| CTCACTCC  | 94               | 26               | $1.43 \times 10^{-40}$  | 1.85 |
| CTCACTCT  | 117              | 35               | $1.10 \times 10^{-43}$  | 1.74 |
| CTCACTGA  | 130              | 27               | $1.91 \times 10^{-87}$  | 2.27 |
| CTCACTGC  | 94               | 28               | $1.05 \times 10^{-35}$  | 1.75 |
| CTCACTTG  | 75               | 19               | $8.90 \times 10^{-38}$  | 1.98 |
| CTCATGCC  | 71               | 20               | $3.99 \times 10^{-30}$  | 1.83 |
| CTCATGTG  | 67               | 14               | $1.51 \times 10^{-45}$  | 2.26 |
| CTCATGTT  | 86               | 25               | $3.11 \times 10^{-34}$  | 1.78 |
| CTCATTCC  | 73               | 20               | $2.12 \times 10^{-32}$  | 1.87 |
| CTCCCTGA  | 124              | 32               | $1.79 \times 10^{-59}$  | 1.95 |
| CTCCTAAC  | 70               | 9                | $6.52 \times 10^{-92}$  | 2.96 |
| CTCCTCAC  | 127              | 33               | $3.49 \times 10^{-60}$  | 1.94 |
| CTCCTGAT  | 89               | 26               | $4.56 \times 10^{-35}$  | 1.78 |
| CTCGCTC   | 78               | 23               | $1.90 \times 10^{-30}$  | 1.76 |
| CTCTAAAT  | 69               | 22               | $1.24 \times 10^{-23}$  | 1.65 |
| CTCTAAC   | 271              | 49               | $9.77 \times 10^{-221}$ | 2.47 |
| CTCTAACC  | 93               | 12               | $6.40 \times 10^{-121}$ | 2.95 |
| CTCTAACT  | 102              | 17               | $1.99 \times 10^{-94}$  | 2.58 |
| CTCTAAT   | 241              | 73               | $4.46 \times 10^{-86}$  | 1.72 |
| CTCTAATG  | 69               | 14               | $6.50 \times 10^{-49}$  | 2.30 |
| CTCTAATT  | 76               | 24               | $2.55 \times 10^{-26}$  | 1.66 |

Continued on next page...

Table 5 – continued from previous page

| Element  | Count next to SS | Background count | Chi-square test         | LOD  |
|----------|------------------|------------------|-------------------------|------|
| CTCTCAC  | 281              | 93               | $1.21 \times 10^{-84}$  | 1.60 |
| CTCTCACC | 110              | 27               | $1.96 \times 10^{-57}$  | 2.03 |
| CTCTGAC  | 508              | 113              | $3.09 \times 10^{-302}$ | 2.17 |
| CTCTGACC | 236              | 35               | $5.13 \times 10^{-253}$ | 2.75 |
| CTCTGACT | 156              | 36               | $5.49 \times 10^{-89}$  | 2.12 |
| CTCTGATC | 80               | 19               | $1.69 \times 10^{-44}$  | 2.07 |
| CTCTGATG | 102              | 18               | $3.03 \times 10^{-87}$  | 2.50 |
| CTGAC    | 4042             | 1343             | 0.00                    | 1.59 |
| CTGACACC | 99               | 23               | $1.47 \times 10^{-56}$  | 2.11 |
| CTGACACT | 78               | 23               | $1.90 \times 10^{-30}$  | 1.76 |
| CTGACATC | 66               | 21               | $9.25 \times 10^{-23}$  | 1.65 |
| CTGACATG | 75               | 21               | $4.73 \times 10^{-32}$  | 1.84 |
| CTGACATT | 92               | 28               | $1.12 \times 10^{-33}$  | 1.72 |
| CTGACC   | 1574             | 415              | 0.00                    | 1.92 |
| CTGACCA  | 330              | 96               | $4.60 \times 10^{-126}$ | 1.78 |
| CTGACCAC | 91               | 25               | $8.77 \times 10^{-40}$  | 1.86 |
| CTGACCAG | 88               | 28               | $8.41 \times 10^{-30}$  | 1.65 |
| CTGACCAT | 87               | 23               | $1.27 \times 10^{-40}$  | 1.92 |
| CTGACCC  | 553              | 123              | 0.00                    | 2.17 |
| CTGACCCA | 111              | 34               | $8.16 \times 10^{-40}$  | 1.71 |
| CTGACCCC | 186              | 39               | $1.63 \times 10^{-122}$ | 2.25 |
| CTGACCCG | 66               | 11               | $9.22 \times 10^{-62}$  | 2.58 |
| CTGACCCT | 217              | 41               | $2.52 \times 10^{-166}$ | 2.40 |
| CTGACCG  | 142              | 26               | $1.45 \times 10^{-114}$ | 2.45 |
| CTGACCT  | 509              | 134              | $3.13 \times 10^{-230}$ | 1.93 |
| CTGACCTC | 180              | 45               | $4.48 \times 10^{-90}$  | 2.00 |
| CTGACCTG | 165              | 37               | $2.64 \times 10^{-98}$  | 2.16 |
| CTGACCTT | 123              | 35               | $4.80 \times 10^{-50}$  | 1.81 |
| CTGACG   | 325              | 85               | $2.14 \times 10^{-149}$ | 1.93 |
| CTGACGC  | 107              | 18               | $1.05 \times 10^{-97}$  | 2.57 |
| CTGACGG  | 110              | 27               | $1.96 \times 10^{-57}$  | 2.03 |
| CTGACGT  | 109              | 30               | $3.68 \times 10^{-47}$  | 1.86 |
| CTGACTCA | 82               | 26               | $4.64 \times 10^{-28}$  | 1.66 |
| CTGACTCT | 150              | 41               | $5.54 \times 10^{-65}$  | 1.87 |
| CTGACTG  | 387              | 112              | $7.19 \times 10^{-149}$ | 1.79 |
| CTGACTGA | 88               | 28               | $8.41 \times 10^{-30}$  | 1.65 |
| CTGACTGC | 115              | 24               | $5.08 \times 10^{-77}$  | 2.26 |
| CTGACTGT | 115              | 28               | $9.64 \times 10^{-61}$  | 2.04 |
| CTGACTTG | 96               | 24               | $6.74 \times 10^{-49}$  | 2.00 |
| CTGACTTT | 167              | 41               | $3.32 \times 10^{-86}$  | 2.03 |
| CTGATCCC | 72               | 21               | $9.05 \times 10^{-29}$  | 1.78 |
| CTGATCTC | 83               | 25               | $4.12 \times 10^{-31}$  | 1.73 |

Continued on next page...



Table 5 – continued from previous page

| Element  | Count next to SS | Background count | Chi-square test         | LOD  |
|----------|------------------|------------------|-------------------------|------|
| CTGATCTT | 78               | 22               | $7.38 \times 10^{-33}$  | 1.83 |
| CTGATGCC | 85               | 24               | $1.37 \times 10^{-35}$  | 1.82 |
| CTGATGCT | 81               | 26               | $3.99 \times 10^{-27}$  | 1.64 |
| CTGATGTG | 82               | 26               | $4.64 \times 10^{-28}$  | 1.66 |
| CTGATTCT | 99               | 32               | $2.31 \times 10^{-32}$  | 1.63 |
| CTGCTAAC | 74               | 15               | $2.11 \times 10^{-52}$  | 2.30 |
| CTGCTAAT | 70               | 18               | $1.55 \times 10^{-34}$  | 1.96 |
| CTGCTCAC | 163              | 31               | $2.98 \times 10^{-124}$ | 2.39 |
| CTGCTCAT | 82               | 25               | $4.18 \times 10^{-30}$  | 1.71 |
| CTGCTGAC | 155              | 37               | $7.83 \times 10^{-84}$  | 2.07 |
| CTGCTGAT | 98               | 31               | $2.37 \times 10^{-33}$  | 1.66 |
| CTGGCTGA | 115              | 32               | $9.66 \times 10^{-49}$  | 1.85 |
| CTGGTGAC | 76               | 24               | $2.55 \times 10^{-26}$  | 1.66 |
| CTGTTTAC | 65               | 21               | $7.87 \times 10^{-22}$  | 1.63 |
| CTTACTAA | 73               | 16               | $4.48 \times 10^{-46}$  | 2.19 |
| CTTACTGA | 73               | 21               | $7.64 \times 10^{-30}$  | 1.80 |
| CTTATTCA | 64               | 20               | $7.67 \times 10^{-23}$  | 1.68 |
| CTTCCTAA | 80               | 26               | $3.30 \times 10^{-26}$  | 1.62 |
| CTTCTAAC | 84               | 18               | $1.44 \times 10^{-54}$  | 2.22 |
| CTTCTAAT | 96               | 24               | $6.74 \times 10^{-49}$  | 2.00 |
| CTTCTCAC | 100              | 28               | $3.65 \times 10^{-42}$  | 1.84 |
| CTTCTGAC | 106              | 23               | $4.18 \times 10^{-67}$  | 2.20 |
| CTTCTGAT | 109              | 35               | $6.72 \times 10^{-36}$  | 1.64 |
| CTTGACTC | 72               | 15               | $4.99 \times 10^{-49}$  | 2.26 |
| CTTGCTGA | 108              | 33               | $5.88 \times 10^{-39}$  | 1.71 |
| CTTGTAAT | 66               | 16               | $7.46 \times 10^{-36}$  | 2.04 |
| CTTGTGAC | 68               | 20               | $7.11 \times 10^{-27}$  | 1.77 |
| CTTTAACT | 81               | 23               | $1.14 \times 10^{-33}$  | 1.82 |
| CTTTAATG | 65               | 21               | $7.87 \times 10^{-22}$  | 1.63 |
| GAAACTAA | 75               | 24               | $2.22 \times 10^{-25}$  | 1.64 |
| GAACTAA  | 177              | 52               | $2.58 \times 10^{-67}$  | 1.77 |
| GAACTAAT | 66               | 13               | $6.48 \times 10^{-49}$  | 2.34 |
| GACCCCTC | 69               | 20               | $6.17 \times 10^{-28}$  | 1.79 |
| GACCTCTC | 67               | 19               | $3.34 \times 10^{-28}$  | 1.82 |
| GACCTGAC | 66               | 19               | $4.16 \times 10^{-27}$  | 1.80 |
| GACTAAC  | 126              | 27               | $6.24 \times 10^{-81}$  | 2.22 |
| GACTAAT  | 170              | 42               | $7.86 \times 10^{-87}$  | 2.02 |
| GACTGAC  | 223              | 52               | $2.60 \times 10^{-124}$ | 2.10 |
| GACTGACC | 86               | 13               | $3.81 \times 10^{-91}$  | 2.73 |
| GACTGACT | 72               | 18               | $4.13 \times 10^{-37}$  | 2.00 |
| GAGCTGAC | 71               | 16               | $5.09 \times 10^{-43}$  | 2.15 |
| GATATTAA | 68               | 19               | $2.55 \times 10^{-29}$  | 1.84 |

Continued on next page...

Table 5 – continued from previous page

| Element   | Count next to SS | Background count | Chi-square test         | LOD  |
|-----------|------------------|------------------|-------------------------|------|
| GATGCTGA  | 75               | 24               | $2.22 \times 10^{-25}$  | 1.64 |
| GATTAAC   | 122              | 32               | $5.40 \times 10^{-57}$  | 1.93 |
| GCACTAA   | 142              | 44               | $2.15 \times 10^{-49}$  | 1.69 |
| GCACTCAC  | 68               | 22               | $1.05 \times 10^{-22}$  | 1.63 |
| GCACTGAC  | 102              | 16               | $1.55 \times 10^{-102}$ | 2.67 |
| GCCCCCCT  | 77               | 24               | $2.81 \times 10^{-27}$  | 1.68 |
| GCCCCCTCA | 104              | 32               | $4.13 \times 10^{-37}$  | 1.70 |
| GCCCCCTGA | 124              | 33               | $1.62 \times 10^{-56}$  | 1.91 |
| GCCCTCAC  | 130              | 26               | $1.81 \times 10^{-92}$  | 2.32 |
| GCCCTGAC  | 174              | 26               | $3.15 \times 10^{-185}$ | 2.74 |
| GCCCTGAT  | 91               | 18               | $2.38 \times 10^{-66}$  | 2.34 |
| GCCGCTC   | 74               | 23               | $2.06 \times 10^{-26}$  | 1.69 |
| GCCTAAC   | 126              | 26               | $1.23 \times 10^{-85}$  | 2.28 |
| GCCTCAC   | 339              | 78               | $6.02 \times 10^{-192}$ | 2.12 |
| GCCTCACA  | 66               | 21               | $9.25 \times 10^{-23}$  | 1.65 |
| GCCTCACC  | 125              | 23               | $2.22 \times 10^{-100}$ | 2.44 |
| GCCTCACT  | 112              | 24               | $3.80 \times 10^{-72}$  | 2.22 |
| GCCTCTCA  | 84               | 26               | $5.58 \times 10^{-30}$  | 1.69 |
| GCCTCTGA  | 116              | 34               | $6.41 \times 10^{-45}$  | 1.77 |
| GCCTGAC   | 340              | 83               | $4.42 \times 10^{-175}$ | 2.03 |
| GCCTGACC  | 144              | 26               | $1.76 \times 10^{-118}$ | 2.47 |
| GCCTGACT  | 94               | 26               | $1.43 \times 10^{-40}$  | 1.85 |
| GCGCTGA   | 79               | 23               | $1.67 \times 10^{-31}$  | 1.78 |
| GCTAAC    | 512              | 134              | $6.77 \times 10^{-234}$ | 1.93 |
| GCTAACA   | 152              | 44               | $1.33 \times 10^{-59}$  | 1.79 |
| GCTAACC   | 141              | 30               | $2.57 \times 10^{-91}$  | 2.23 |
| GCTAACG   | 66               | 6                | $1.67 \times 10^{-132}$ | 3.46 |
| GCTAACT   | 160              | 45               | $7.05 \times 10^{-66}$  | 1.83 |
| GCTAATC   | 108              | 33               | $5.88 \times 10^{-39}$  | 1.71 |
| GCTAATGT  | 71               | 18               | $8.23 \times 10^{-36}$  | 1.98 |
| GCTCACAC  | 65               | 18               | $1.60 \times 10^{-28}$  | 1.85 |
| GCTCACC   | 293              | 84               | $4.17 \times 10^{-115}$ | 1.80 |
| GCTCACCC  | 97               | 26               | $4.51 \times 10^{-44}$  | 1.90 |
| GCTCACCT  | 111              | 30               | $1.74 \times 10^{-49}$  | 1.89 |
| GCTCACG   | 126              | 24               | $2.81 \times 10^{-96}$  | 2.39 |
| GCTCACT   | 277              | 75               | $2.45 \times 10^{-120}$ | 1.88 |
| GCTCACTC  | 78               | 12               | $6.25 \times 10^{-81}$  | 2.70 |
| GCTCACTG  | 102              | 28               | $1.93 \times 10^{-44}$  | 1.87 |
| GCTCACTT  | 65               | 20               | $8.10 \times 10^{-24}$  | 1.70 |
| GCTCATGT  | 65               | 16               | $1.68 \times 10^{-34}$  | 2.02 |
| GCTCTAA   | 172              | 55               | $4.52 \times 10^{-56}$  | 1.64 |
| GCTCTAAC  | 70               | 7                | $2.52 \times 10^{-125}$ | 3.32 |

Continued on next page...

Table 5 – continued from previous page

| Element  | Count next to SS | Background count | Chi-square test         | LOD  |
|----------|------------------|------------------|-------------------------|------|
| GCTCTGAC | 137              | 20               | $7.18 \times 10^{-151}$ | 2.78 |
| GCTCTGAT | 84               | 24               | $1.73 \times 10^{-34}$  | 1.81 |
| GCTGAC   | 1030             | 282              | 0.00                    | 1.87 |
| GCTGACA  | 228              | 74               | $1.13 \times 10^{-71}$  | 1.62 |
| GCTGACAC | 76               | 14               | $1.14 \times 10^{-61}$  | 2.44 |
| GCTGACAT | 75               | 14               | $9.40 \times 10^{-60}$  | 2.42 |
| GCTGACC  | 360              | 78               | $1.00 \times 10^{-223}$ | 2.21 |
| GCTGACCA | 87               | 26               | $5.54 \times 10^{-33}$  | 1.74 |
| GCTGACCC | 143              | 22               | $9.48 \times 10^{-147}$ | 2.70 |
| GCTGACCT | 111              | 27               | $8.77 \times 10^{-59}$  | 2.04 |
| GCTGACG  | 115              | 28               | $9.64 \times 10^{-61}$  | 2.04 |
| GCTGACT  | 300              | 78               | $1.96 \times 10^{-139}$ | 1.94 |
| GCTGACTC | 76               | 18               | $1.52 \times 10^{-42}$  | 2.08 |
| GCTGACTG | 96               | 18               | $1.74 \times 10^{-75}$  | 2.42 |
| GCTGACTT | 88               | 22               | $5.70 \times 10^{-45}$  | 2.00 |
| GCTGATTT | 81               | 24               | $2.73 \times 10^{-31}$  | 1.75 |
| GCTTACC  | 93               | 30               | $1.29 \times 10^{-30}$  | 1.63 |
| GGACTGAC | 73               | 9                | $5.56 \times 10^{-101}$ | 3.02 |
| GGACTCA  | 65               | 18               | $1.60 \times 10^{-28}$  | 1.85 |
| GGCCCTCA | 96               | 27               | $3.06 \times 10^{-40}$  | 1.83 |
| GGCCCTGA | 160              | 42               | $4.46 \times 10^{-74}$  | 1.93 |
| GGCCGGGG | 71               | 22               | $1.51 \times 10^{-25}$  | 1.69 |
| GGCCTCAC | 129              | 26               | $9.77 \times 10^{-91}$  | 2.31 |
| GGCCTGA  | 299              | 96               | $2.33 \times 10^{-95}$  | 1.64 |
| GGCCTGAC | 132              | 18               | $4.90 \times 10^{-159}$ | 2.87 |
| GGCGGGGG | 111              | 35               | $9.01 \times 10^{-38}$  | 1.67 |
| GGCTAAC  | 114              | 23               | $2.75 \times 10^{-80}$  | 2.31 |
| GGCTCAC  | 264              | 87               | $2.66 \times 10^{-80}$  | 1.60 |
| GGCTCACC | 89               | 19               | $4.93 \times 10^{-58}$  | 2.23 |
| GGCTCACT | 74               | 23               | $2.06 \times 10^{-26}$  | 1.69 |
| GGCTCATG | 64               | 20               | $7.67 \times 10^{-23}$  | 1.68 |
| GGCTCTGA | 125              | 36               | $8.90 \times 10^{-50}$  | 1.80 |
| GGCTGAC  | 300              | 71               | $1.19 \times 10^{-162}$ | 2.08 |
| GGCTGACC | 128              | 24               | $5.15 \times 10^{-100}$ | 2.42 |
| GGCTGACT | 84               | 18               | $1.44 \times 10^{-54}$  | 2.22 |
| GGGACTGA | 65               | 20               | $8.10 \times 10^{-24}$  | 1.70 |
| GGGAGGGT | 126              | 40               | $4.12 \times 10^{-42}$  | 1.66 |
| GGGCCGGG | 96               | 24               | $6.74 \times 10^{-49}$  | 2.00 |
| GGGCCTGA | 78               | 22               | $7.38 \times 10^{-33}$  | 1.83 |
| GGGCGGGC | 70               | 18               | $1.55 \times 10^{-34}$  | 1.96 |
| GGGCTCAC | 91               | 23               | $1.24 \times 10^{-45}$  | 1.98 |
| GGGCTGAC | 105              | 18               | $1.90 \times 10^{-93}$  | 2.54 |

Continued on next page...

Table 5 – continued from previous page

| Element  | Count next to SS | Background count | Chi-square test         | LOD  |
|----------|------------------|------------------|-------------------------|------|
| GGGGCTGA | 105              | 30               | $1.12 \times 10^{-42}$  | 1.81 |
| GGGGTGAC | 64               | 20               | $7.67 \times 10^{-23}$  | 1.68 |
| GGGGTGGC | 95               | 28               | $9.62 \times 10^{-37}$  | 1.76 |
| GGGTAGGG | 76               | 25               | $1.98 \times 10^{-24}$  | 1.60 |
| GGGTGGGC | 144              | 40               | $9.26 \times 10^{-61}$  | 1.85 |
| GGTCCTGA | 83               | 23               | $6.51 \times 10^{-36}$  | 1.85 |
| GGTCTCAC | 74               | 18               | $8.85 \times 10^{-40}$  | 2.04 |
| GGTCTGAC | 66               | 10               | $3.59 \times 10^{-70}$  | 2.72 |
| GGTGACCT | 77               | 24               | $2.81 \times 10^{-27}$  | 1.68 |
| GTAACATT | 80               | 22               | $4.01 \times 10^{-35}$  | 1.86 |
| GTAACTTT | 88               | 28               | $8.41 \times 10^{-30}$  | 1.65 |
| GTCCCTGA | 94               | 24               | $2.57 \times 10^{-46}$  | 1.97 |
| GTCCTCAC | 86               | 19               | $2.57 \times 10^{-53}$  | 2.18 |
| GTCCTGAC | 92               | 17               | $6.17 \times 10^{-74}$  | 2.44 |
| GTCTAAC  | 109              | 24               | $1.95 \times 10^{-67}$  | 2.18 |
| GTCTAAT  | 144              | 40               | $9.26 \times 10^{-61}$  | 1.85 |
| GTCTCAC  | 228              | 62               | $1.16 \times 10^{-98}$  | 1.88 |
| GTCTCACC | 73               | 13               | $3.51 \times 10^{-62}$  | 2.49 |
| GTCTCACT | 88               | 22               | $5.70 \times 10^{-45}$  | 2.00 |
| GTCTCATT | 77               | 23               | $2.07 \times 10^{-29}$  | 1.74 |
| GTCTGAC  | 218              | 56               | $6.29 \times 10^{-104}$ | 1.96 |
| GTCTGACC | 83               | 16               | $5.66 \times 10^{-63}$  | 2.38 |
| GTCTGACT | 76               | 20               | $5.66 \times 10^{-36}$  | 1.93 |
| GTCTGAT  | 189              | 60               | $2.83 \times 10^{-62}$  | 1.66 |
| GTGACTCT | 67               | 22               | $8.47 \times 10^{-22}$  | 1.61 |
| GTGCTAA  | 183              | 48               | $1.45 \times 10^{-84}$  | 1.93 |
| GTGCTAAC | 64               | 10               | $2.23 \times 10^{-65}$  | 2.68 |
| GTGCTAAT | 71               | 13               | $3.18 \times 10^{-58}$  | 2.45 |
| GTGCTCAC | 100              | 17               | $3.99 \times 10^{-90}$  | 2.56 |
| GTGCTGAC | 133              | 19               | $8.99 \times 10^{-151}$ | 2.81 |
| GTGCTGAT | 87               | 26               | $5.54 \times 10^{-33}$  | 1.74 |
| GTGGGGGC | 132              | 41               | $7.73 \times 10^{-46}$  | 1.69 |
| GTGTAAC  | 137              | 36               | $1.39 \times 10^{-63}$  | 1.93 |
| GTGTAATT | 64               | 17               | $4.22 \times 10^{-30}$  | 1.91 |
| GTGTCTAA | 66               | 14               | $6.55 \times 10^{-44}$  | 2.24 |
| GTTAACAT | 64               | 19               | $5.50 \times 10^{-25}$  | 1.75 |
| GTTAACC  | 97               | 31               | $2.05 \times 10^{-32}$  | 1.65 |
| GTTAATAA | 86               | 28               | $5.88 \times 10^{-28}$  | 1.62 |
| GTTACTAA | 64               | 12               | $6.21 \times 10^{-51}$  | 2.42 |
| GTTCTAAT | 71               | 22               | $1.51 \times 10^{-25}$  | 1.69 |
| GTTCTCAC | 67               | 20               | $7.81 \times 10^{-26}$  | 1.74 |
| GTTCTGAC | 71               | 12               | $4.77 \times 10^{-65}$  | 2.56 |

Continued on next page...

Table 5 – continued from previous page

| Element  | Count next to SS | Background count | Chi-square test         | LOD  |
|----------|------------------|------------------|-------------------------|------|
| GTTCTGAT | 81               | 22               | $2.76 \times 10^{-36}$  | 1.88 |
| GTTTAATG | 64               | 19               | $5.50 \times 10^{-25}$  | 1.75 |
| GTTTCTAA | 114              | 34               | $7.71 \times 10^{-43}$  | 1.75 |
| GTTTTAAC | 83               | 23               | $6.51 \times 10^{-36}$  | 1.85 |
| TAAAATAA | 71               | 21               | $1.02 \times 10^{-27}$  | 1.76 |
| TAAATTG  | 72               | 19               | $5.13 \times 10^{-34}$  | 1.92 |
| TAACACT  | 199              | 60               | $5.25 \times 10^{-72}$  | 1.73 |
| TAACACTT | 77               | 24               | $2.81 \times 10^{-27}$  | 1.68 |
| TAACATTT | 183              | 60               | $8.80 \times 10^{-57}$  | 1.61 |
| TAACCATT | 73               | 20               | $2.12 \times 10^{-32}$  | 1.87 |
| TAACCCTT | 70               | 15               | $9.03 \times 10^{-46}$  | 2.22 |
| TAACCTTT | 106              | 29               | $2.23 \times 10^{-46}$  | 1.87 |
| TAACGC   | 112              | 30               | $1.13 \times 10^{-50}$  | 1.90 |
| TAACGT   | 197              | 54               | $2.40 \times 10^{-84}$  | 1.87 |
| TAACGTG  | 68               | 17               | $3.83 \times 10^{-35}$  | 2.00 |
| TAACGTT  | 70               | 15               | $9.03 \times 10^{-46}$  | 2.22 |
| TAACTAAT | 91               | 20               | $9.27 \times 10^{-57}$  | 2.19 |
| TAACTCTT | 88               | 27               | $7.99 \times 10^{-32}$  | 1.70 |
| TAACTGAT | 69               | 19               | $1.85 \times 10^{-30}$  | 1.86 |
| TAACTGTG | 67               | 22               | $8.47 \times 10^{-22}$  | 1.61 |
| TAACTTTG | 79               | 23               | $1.67 \times 10^{-31}$  | 1.78 |
| TAATAACT | 72               | 22               | $1.56 \times 10^{-26}$  | 1.71 |
| TAATCATT | 88               | 26               | $5.12 \times 10^{-34}$  | 1.76 |
| TAATGACT | 76               | 24               | $2.55 \times 10^{-26}$  | 1.66 |
| TAATGCAT | 74               | 23               | $2.06 \times 10^{-26}$  | 1.69 |
| TAATGTGT | 112              | 31               | $6.00 \times 10^{-48}$  | 1.85 |
| TAATTAAC | 74               | 18               | $8.85 \times 10^{-40}$  | 2.04 |
| TAATTAAT | 147              | 47               | $3.42 \times 10^{-48}$  | 1.65 |
| TAATTGAT | 75               | 23               | $2.16 \times 10^{-27}$  | 1.71 |
| TAATTTCT | 64               | 15               | $1.09 \times 10^{-36}$  | 2.09 |
| TACTAAC  | 167              | 33               | $2.38 \times 10^{-120}$ | 2.34 |
| TACTAACA | 64               | 14               | $9.93 \times 10^{-41}$  | 2.19 |
| TACTAAT  | 282              | 72               | $3.17 \times 10^{-135}$ | 1.97 |
| TACTAATG | 71               | 15               | $2.19 \times 10^{-47}$  | 2.24 |
| TACTAATT | 102              | 21               | $6.45 \times 10^{-70}$  | 2.28 |
| TACTCAC  | 142              | 44               | $2.15 \times 10^{-49}$  | 1.69 |
| TACTGAC  | 184              | 48               | $8.55 \times 10^{-86}$  | 1.94 |
| TACTGACT | 71               | 20               | $3.99 \times 10^{-30}$  | 1.83 |
| TACTGAT  | 226              | 72               | $1.30 \times 10^{-73}$  | 1.65 |
| TACTGATG | 65               | 19               | $4.91 \times 10^{-26}$  | 1.77 |
| TATATTA  | 88               | 28               | $8.41 \times 10^{-30}$  | 1.65 |
| TATATTTT | 81               | 25               | $4.07 \times 10^{-29}$  | 1.70 |

Continued on next page...

Table 5 – continued from previous page

| Element   | Count next to SS | Background count | Chi-square test         | LOD  |
|-----------|------------------|------------------|-------------------------|------|
| TATCTAAT  | 76               | 24               | $2.55 \times 10^{-26}$  | 1.66 |
| TATTAAC   | 250              | 78               | $1.77 \times 10^{-84}$  | 1.68 |
| TATTAACT  | 87               | 20               | $9.67 \times 10^{-51}$  | 2.12 |
| TATTAATT  | 142              | 44               | $2.15 \times 10^{-49}$  | 1.69 |
| TATTCTAA  | 88               | 28               | $8.41 \times 10^{-30}$  | 1.65 |
| TATTGATG  | 70               | 21               | $1.10 \times 10^{-26}$  | 1.74 |
| TCACCCTC  | 87               | 28               | $7.16 \times 10^{-29}$  | 1.64 |
| TCACCCTCT | 112              | 36               | $9.04 \times 10^{-37}$  | 1.64 |
| TCACGCT   | 70               | 19               | $1.27 \times 10^{-31}$  | 1.88 |
| TCACTAA   | 226              | 65               | $1.01 \times 10^{-88}$  | 1.80 |
| TCACTAAC  | 69               | 6                | $7.04 \times 10^{-146}$ | 3.52 |
| TCACTAAT  | 72               | 18               | $4.13 \times 10^{-37}$  | 2.00 |
| TCACTCAC  | 75               | 15               | $3.93 \times 10^{-54}$  | 2.32 |
| TCACTCAT  | 67               | 20               | $7.81 \times 10^{-26}$  | 1.74 |
| TCACTCTC  | 71               | 23               | $1.40 \times 10^{-23}$  | 1.63 |
| TCACTGAC  | 121              | 20               | $6.17 \times 10^{-113}$ | 2.60 |
| TCAGTAAC  | 64               | 17               | $4.22 \times 10^{-30}$  | 1.91 |
| TCATTAAC  | 66               | 20               | $8.15 \times 10^{-25}$  | 1.72 |
| TCCACTCA  | 73               | 20               | $2.12 \times 10^{-32}$  | 1.87 |
| TCCCACTC  | 81               | 26               | $3.99 \times 10^{-27}$  | 1.64 |
| TCCCCCCC  | 95               | 23               | $6.03 \times 10^{-51}$  | 2.05 |
| TCCCCTGA  | 119              | 35               | $9.33 \times 10^{-46}$  | 1.77 |
| TCCCTAAC  | 65               | 13               | $3.75 \times 10^{-47}$  | 2.32 |
| TCCCTCAC  | 104              | 23               | $5.35 \times 10^{-64}$  | 2.18 |
| TCCCTGAC  | 123              | 31               | $2.47 \times 10^{-61}$  | 1.99 |
| TCCCTGAT  | 73               | 22               | $1.55 \times 10^{-27}$  | 1.73 |
| TCCTAAC   | 238              | 59               | $4.03 \times 10^{-120}$ | 2.01 |
| TCCTAACA  | 70               | 14               | $1.21 \times 10^{-50}$  | 2.32 |
| TCCTAACC  | 69               | 13               | $2.12 \times 10^{-54}$  | 2.41 |
| TCCTAACT  | 86               | 20               | $2.73 \times 10^{-49}$  | 2.10 |
| TCCTAAT   | 259              | 79               | $3.42 \times 10^{-91}$  | 1.71 |
| TCCTAATG  | 79               | 14               | $1.34 \times 10^{-67}$  | 2.50 |
| TCCTAATT  | 80               | 26               | $3.30 \times 10^{-26}$  | 1.62 |
| TCCTCAC   | 352              | 111              | $8.20 \times 10^{-116}$ | 1.67 |
| TCCTCACC  | 123              | 32               | $3.16 \times 10^{-58}$  | 1.94 |
| TCCTCACT  | 117              | 37               | $1.66 \times 10^{-39}$  | 1.66 |
| TCCTCTAA  | 67               | 17               | $7.61 \times 10^{-34}$  | 1.98 |
| TCCTGAC   | 364              | 120              | $6.51 \times 10^{-110}$ | 1.60 |
| TCCTGACA  | 79               | 22               | $5.56 \times 10^{-34}$  | 1.84 |
| TCCTGACT  | 125              | 33               | $1.00 \times 10^{-57}$  | 1.92 |
| TCCTGATG  | 82               | 26               | $4.64 \times 10^{-28}$  | 1.66 |
| TCTAAATG  | 84               | 27               | $5.34 \times 10^{-28}$  | 1.64 |

Continued on next page...

Table 5 – continued from previous page

| Element  | Count next to SS | Background count | Chi-square test         | LOD  |
|----------|------------------|------------------|-------------------------|------|
| TCTAAC   | 745              | 185              | 0.00                    | 2.01 |
| TCTAACA  | 219              | 59               | $2.29 \times 10^{-96}$  | 1.89 |
| TCTAACAT | 67               | 14               | $1.51 \times 10^{-45}$  | 2.26 |
| TCTAACC  | 209              | 43               | $2.18 \times 10^{-141}$ | 2.28 |
| TCTAACCA | 70               | 15               | $9.03 \times 10^{-46}$  | 2.22 |
| TCTAACCC | 65               | 13               | $3.75 \times 10^{-47}$  | 2.32 |
| TCTAACCT | 87               | 15               | $3.84 \times 10^{-77}$  | 2.54 |
| TCTAACT  | 262              | 68               | $2.20 \times 10^{-122}$ | 1.95 |
| TCTAACTC | 65               | 15               | $3.95 \times 10^{-38}$  | 2.12 |
| TCTAACTG | 65               | 11               | $1.33 \times 10^{-59}$  | 2.56 |
| TCTAACTT | 92               | 18               | $3.96 \times 10^{-68}$  | 2.35 |
| TCTAATA  | 248              | 75               | $8.79 \times 10^{-89}$  | 1.73 |
| TCTAATAA | 77               | 23               | $2.07 \times 10^{-29}$  | 1.74 |
| TCTAATAT | 82               | 26               | $4.64 \times 10^{-28}$  | 1.66 |
| TCTAATCT | 79               | 24               | $3.01 \times 10^{-29}$  | 1.72 |
| TCTAATG  | 274              | 75               | $7.58 \times 10^{-117}$ | 1.87 |
| TCTAATGA | 85               | 26               | $5.79 \times 10^{-31}$  | 1.71 |
| TCTAATGT | 97               | 19               | $1.30 \times 10^{-71}$  | 2.35 |
| TCTAATTG | 67               | 20               | $7.81 \times 10^{-26}$  | 1.74 |
| TCTCACC  | 317              | 84               | $1.41 \times 10^{-142}$ | 1.92 |
| TCTCACCA | 77               | 24               | $2.81 \times 10^{-27}$  | 1.68 |
| TCTCACCC | 115              | 29               | $2.07 \times 10^{-57}$  | 1.99 |
| TCTCACCT | 132              | 26               | $5.51 \times 10^{-96}$  | 2.34 |
| TCTCACG  | 77               | 19               | $2.13 \times 10^{-40}$  | 2.02 |
| TCTCACTG | 112              | 35               | $9.99 \times 10^{-39}$  | 1.68 |
| TCTCCTAA | 77               | 21               | $2.42 \times 10^{-34}$  | 1.87 |
| TCTCTAAC | 93               | 16               | $1.41 \times 10^{-82}$  | 2.54 |
| TCTCTAAT | 88               | 26               | $5.12 \times 10^{-34}$  | 1.76 |
| TCTCTGAC | 141              | 29               | $4.51 \times 10^{-96}$  | 2.28 |
| TCTCTGAT | 118              | 37               | $1.86 \times 10^{-40}$  | 1.67 |
| TCTGAC   | 1175             | 372              | 0.00                    | 1.66 |
| TCTGACC  | 447              | 103              | $7.61 \times 10^{-252}$ | 2.12 |
| TCTGACCA | 88               | 23               | $7.55 \times 10^{-42}$  | 1.94 |
| TCTGACCC | 165              | 29               | $1.01 \times 10^{-140}$ | 2.51 |
| TCTGACCT | 156              | 34               | $3.31 \times 10^{-97}$  | 2.20 |
| TCTGACG  | 80               | 21               | $6.23 \times 10^{-38}$  | 1.93 |
| TCTGACT  | 401              | 133              | $1.83 \times 10^{-119}$ | 1.59 |
| TCTGACTC | 121              | 39               | $2.20 \times 10^{-39}$  | 1.63 |
| TCTGACTG | 121              | 31               | $8.96 \times 10^{-59}$  | 1.96 |
| TCTGACTT | 145              | 41               | $2.54 \times 10^{-59}$  | 1.82 |
| TCTGATGC | 67               | 21               | $1.04 \times 10^{-23}$  | 1.67 |
| TCTGATTC | 85               | 22               | $3.94 \times 10^{-41}$  | 1.95 |

Continued on next page...

Table 5 – continued from previous page

| Element  | Count next to SS | Background count | Chi-square test         | LOD  |
|----------|------------------|------------------|-------------------------|------|
| TCTGATTG | 75               | 24               | $2.22 \times 10^{-25}$  | 1.64 |
| TCTGCTAA | 74               | 23               | $2.06 \times 10^{-26}$  | 1.69 |
| TCTTAACT | 92               | 25               | $6.04 \times 10^{-41}$  | 1.88 |
| TCTTACCT | 66               | 18               | $1.12 \times 10^{-29}$  | 1.87 |
| TCTTGACT | 64               | 19               | $5.50 \times 10^{-25}$  | 1.75 |
| TCTTTAAC | 68               | 22               | $1.05 \times 10^{-22}$  | 1.63 |
| TGAACTAA | 65               | 15               | $3.95 \times 10^{-38}$  | 2.12 |
| TGACCCCT | 117              | 30               | $8.17 \times 10^{-57}$  | 1.96 |
| TGACCCT  | 364              | 113              | $2.86 \times 10^{-123}$ | 1.69 |
| TGACCCTC | 108              | 24               | $6.67 \times 10^{-66}$  | 2.17 |
| TGACCCTT | 92               | 24               | $8.31 \times 10^{-44}$  | 1.94 |
| TGACCGC  | 77               | 18               | $5.79 \times 10^{-44}$  | 2.10 |
| TGACCTCC | 84               | 26               | $5.58 \times 10^{-30}$  | 1.69 |
| TGACCTCT | 118              | 39               | $1.12 \times 10^{-36}$  | 1.60 |
| TGACCTGC | 76               | 23               | $2.16 \times 10^{-28}$  | 1.72 |
| TGACCTGT | 72               | 22               | $1.56 \times 10^{-26}$  | 1.71 |
| TGACGCC  | 67               | 18               | $7.43 \times 10^{-31}$  | 1.90 |
| TGACGCT  | 78               | 21               | $1.62 \times 10^{-35}$  | 1.89 |
| TGACTAA  | 212              | 67               | $3.22 \times 10^{-70}$  | 1.66 |
| TGACTAAT | 74               | 18               | $8.85 \times 10^{-40}$  | 2.04 |
| TGACTCTT | 85               | 24               | $1.37 \times 10^{-35}$  | 1.82 |
| TGACTGAC | 108              | 20               | $3.36 \times 10^{-86}$  | 2.43 |
| TGACTGAT | 90               | 22               | $1.25 \times 10^{-47}$  | 2.03 |
| TGACTGCT | 84               | 27               | $5.34 \times 10^{-28}$  | 1.64 |
| TGACTTGT | 77               | 23               | $2.07 \times 10^{-29}$  | 1.74 |
| TGATTAAT | 84               | 27               | $5.34 \times 10^{-28}$  | 1.64 |
| TGCCTCAC | 88               | 24               | $5.29 \times 10^{-39}$  | 1.87 |
| TGCCTGAC | 110              | 24               | $5.47 \times 10^{-69}$  | 2.20 |
| TGCTAAC  | 234              | 48               | $9.13 \times 10^{-159}$ | 2.29 |
| TGCTAACA | 75               | 15               | $3.93 \times 10^{-54}$  | 2.32 |
| TGCTAACC | 69               | 10               | $1.10 \times 10^{-77}$  | 2.79 |
| TGCTAACT | 83               | 18               | $5.56 \times 10^{-53}$  | 2.21 |
| TGCTAAT  | 344              | 88               | $5.54 \times 10^{-164}$ | 1.97 |
| TGCTAATA | 73               | 23               | $1.89 \times 10^{-25}$  | 1.67 |
| TGCTAATG | 116              | 26               | $1.01 \times 10^{-69}$  | 2.16 |
| TGCTAATT | 93               | 20               | $6.73 \times 10^{-60}$  | 2.22 |
| TGCTCAC  | 372              | 96               | $1.37 \times 10^{-174}$ | 1.95 |
| TGCTCACC | 126              | 28               | $1.41 \times 10^{-76}$  | 2.17 |
| TGCTCACT | 125              | 25               | $5.50 \times 10^{-89}$  | 2.32 |
| TGCTCATG | 89               | 28               | $9.53 \times 10^{-31}$  | 1.67 |
| TGCTGAC  | 447              | 99               | $5.20 \times 10^{-268}$ | 2.17 |
| TGCTGACA | 114              | 30               | $4.37 \times 10^{-53}$  | 1.93 |

Continued on next page...



Table 5 – continued from previous page

| Element   | Count next to SS | Background count | Chi-square test         | LOD  |
|-----------|------------------|------------------|-------------------------|------|
| TGCTGACC  | 151              | 24               | $3.58 \times 10^{-148}$ | 2.65 |
| TGCTGACT  | 136              | 29               | $7.47 \times 10^{-88}$  | 2.23 |
| TGCTGATC  | 68               | 21               | $1.11 \times 10^{-24}$  | 1.70 |
| TGGCTCAC  | 97               | 27               | $2.30 \times 10^{-41}$  | 1.85 |
| TGGCTCAT  | 64               | 19               | $5.50 \times 10^{-25}$  | 1.75 |
| TGGCTGAC  | 85               | 22               | $3.94 \times 10^{-41}$  | 1.95 |
| TGGGCTGA  | 98               | 28               | $5.98 \times 10^{-40}$  | 1.81 |
| TGGGGTGG  | 190              | 59               | $3.21 \times 10^{-65}$  | 1.69 |
| TGGTCTGA  | 74               | 19               | $1.68 \times 10^{-36}$  | 1.96 |
| TGGTGACT  | 86               | 18               | $8.17 \times 10^{-58}$  | 2.26 |
| TGTAACCT  | 94               | 30               | $1.52 \times 10^{-31}$  | 1.65 |
| TGTACTCA  | 64               | 19               | $5.50 \times 10^{-25}$  | 1.75 |
| TGTACTGA  | 72               | 21               | $9.05 \times 10^{-29}$  | 1.78 |
| TGTCCTAA  | 74               | 20               | $1.43 \times 10^{-33}$  | 1.89 |
| TGTCTAA   | 221              | 71               | $6.82 \times 10^{-71}$  | 1.64 |
| TGTCTAAC  | 70               | 14               | $1.21 \times 10^{-50}$  | 2.32 |
| TGTCTAAT  | 86               | 20               | $2.73 \times 10^{-49}$  | 2.10 |
| TGTCTCAC  | 84               | 19               | $2.75 \times 10^{-50}$  | 2.14 |
| TGTCTCAT  | 79               | 23               | $1.67 \times 10^{-31}$  | 1.78 |
| TGTCTGAC  | 90               | 21               | $3.10 \times 10^{-51}$  | 2.10 |
| TGTCTGAT  | 89               | 24               | $3.54 \times 10^{-40}$  | 1.89 |
| TGTCTTAC  | 66               | 16               | $7.46 \times 10^{-36}$  | 2.04 |
| TGTGCTAA  | 85               | 17               | $4.16 \times 10^{-61}$  | 2.32 |
| TGTGCTGA  | 130              | 36               | $2.55 \times 10^{-55}$  | 1.85 |
| TGTGTAAC  | 80               | 22               | $4.01 \times 10^{-35}$  | 1.86 |
| TGTTAATG  | 87               | 28               | $7.16 \times 10^{-29}$  | 1.64 |
| TGTTCTAA  | 103              | 32               | $3.91 \times 10^{-36}$  | 1.69 |
| TGTTGACT  | 75               | 24               | $2.22 \times 10^{-25}$  | 1.64 |
| TGTTTAAAC | 81               | 26               | $3.99 \times 10^{-27}$  | 1.64 |
| TGTTTAAAT | 151              | 49               | $4.26 \times 10^{-48}$  | 1.62 |
| TTAACACT  | 70               | 18               | $1.55 \times 10^{-34}$  | 1.96 |
| TTAACCTT  | 90               | 28               | $1.04 \times 10^{-31}$  | 1.68 |
| TTAACCTAA | 64               | 18               | $2.17 \times 10^{-27}$  | 1.83 |
| TTAACCTCA | 67               | 18               | $7.43 \times 10^{-31}$  | 1.90 |
| TTAACCTCT | 94               | 30               | $1.52 \times 10^{-31}$  | 1.65 |
| TTAACCTGA | 82               | 26               | $4.64 \times 10^{-28}$  | 1.66 |
| TTAACCTTA | 67               | 20               | $7.81 \times 10^{-26}$  | 1.74 |
| TTAATAA   | 98               | 31               | $2.37 \times 10^{-33}$  | 1.66 |
| TTAATCTA  | 64               | 18               | $2.17 \times 10^{-27}$  | 1.83 |
| TTAATTAC  | 68               | 21               | $1.11 \times 10^{-24}$  | 1.70 |
| TTAATTTT  | 73               | 24               | $1.49 \times 10^{-23}$  | 1.60 |
| TTACTAAA  | 90               | 24               | $2.28 \times 10^{-41}$  | 1.91 |

Continued on next page...

Table 5 – continued from previous page

| Element  | Count next to SS | Background count | Chi-square test         | LOD  |
|----------|------------------|------------------|-------------------------|------|
| TTACTAAC | 74               | 13               | $3.29 \times 10^{-64}$  | 2.51 |
| TTACTAAT | 110              | 27               | $1.96 \times 10^{-57}$  | 2.03 |
| TTACTGAC | 70               | 18               | $1.55 \times 10^{-34}$  | 1.96 |
| TTACTGAT | 89               | 27               | $8.06 \times 10^{-33}$  | 1.72 |
| TTATAACA | 80               | 24               | $2.93 \times 10^{-30}$  | 1.74 |
| TTATTAAC | 89               | 24               | $3.54 \times 10^{-40}$  | 1.89 |
| TTCACTAA | 74               | 21               | $6.16 \times 10^{-31}$  | 1.82 |
| TTCACTGA | 89               | 28               | $9.53 \times 10^{-31}$  | 1.67 |
| TTCCTAAC | 98               | 19               | $2.06 \times 10^{-73}$  | 2.37 |
| TTCCTAAT | 107              | 28               | $2.11 \times 10^{-50}$  | 1.93 |
| TTCCTGAC | 117              | 30               | $8.17 \times 10^{-57}$  | 1.96 |
| TTCTAAC  | 314              | 74               | $2.68 \times 10^{-171}$ | 2.09 |
| TTCTAACA | 107              | 24               | $2.19 \times 10^{-64}$  | 2.16 |
| TTCTAACC | 70               | 15               | $9.03 \times 10^{-46}$  | 2.22 |
| TTCTAACT | 133              | 26               | $9.08 \times 10^{-98}$  | 2.35 |
| TTCTAAT  | 481              | 136              | $2.37 \times 10^{-192}$ | 1.82 |
| TTCTAATA | 118              | 34               | $4.74 \times 10^{-47}$  | 1.80 |
| TTCTAATC | 83               | 16               | $5.66 \times 10^{-63}$  | 2.38 |
| TTCTAATG | 118              | 27               | $1.14 \times 10^{-68}$  | 2.13 |
| TTCTAATT | 165              | 50               | $1.79 \times 10^{-59}$  | 1.72 |
| TTCTCACT | 120              | 35               | $8.25 \times 10^{-47}$  | 1.78 |
| TTCTGAC  | 380              | 111              | $8.49 \times 10^{-144}$ | 1.78 |
| TTCTGACC | 125              | 27               | $2.42 \times 10^{-79}$  | 2.21 |
| TTCTGACT | 135              | 41               | $8.60 \times 10^{-49}$  | 1.72 |
| TTCTGATC | 75               | 20               | $9.24 \times 10^{-35}$  | 1.91 |
| TTCTTAAC | 88               | 28               | $8.41 \times 10^{-30}$  | 1.65 |
| TTCTTACC | 68               | 18               | $4.66 \times 10^{-32}$  | 1.92 |
| TTGACTGA | 85               | 23               | $3.13 \times 10^{-38}$  | 1.89 |
| TTGATTAA | 78               | 23               | $1.90 \times 10^{-30}$  | 1.76 |
| TTGCTAA  | 305              | 100              | $2.13 \times 10^{-93}$  | 1.61 |
| TTGCTAAC | 69               | 14               | $6.50 \times 10^{-49}$  | 2.30 |
| TTGCTAAT | 131              | 31               | $3.96 \times 10^{-72}$  | 2.08 |
| TTGCTCAC | 93               | 20               | $6.73 \times 10^{-60}$  | 2.22 |
| TTGCTGAC | 94               | 17               | $7.86 \times 10^{-78}$  | 2.47 |
| TTGCTGAT | 103              | 32               | $3.91 \times 10^{-36}$  | 1.69 |
| TTGTAAC  | 194              | 61               | $4.99 \times 10^{-65}$  | 1.67 |
| TTGTATT  | 127              | 37               | $1.55 \times 10^{-49}$  | 1.78 |
| TTGTATTT | 66               | 16               | $7.46 \times 10^{-36}$  | 2.04 |
| TTGTCTAA | 66               | 20               | $8.15 \times 10^{-25}$  | 1.72 |
| TTGTTAAC | 75               | 20               | $9.24 \times 10^{-35}$  | 1.91 |
| TTTAACAA | 91               | 28               | $1.10 \times 10^{-32}$  | 1.70 |
| TTTAACG  | 64               | 15               | $1.09 \times 10^{-36}$  | 2.09 |

Continued on next page...

Table 5 – continued from previous page

| Element                   | Count next to SS | Background count | Chi-square test         | LOD   |
|---------------------------|------------------|------------------|-------------------------|-------|
| TTTAACTA                  | 77               | 25               | $2.48 \times 10^{-25}$  | 1.62  |
| TTTAATAT                  | 69               | 21               | $1.13 \times 10^{-25}$  | 1.72  |
| TTTAATTT                  | 135              | 44               | $7.82 \times 10^{-43}$  | 1.62  |
| TTTACTAA                  | 130              | 33               | $5.74 \times 10^{-64}$  | 1.98  |
| TTTATTAA                  | 75               | 21               | $4.73 \times 10^{-32}$  | 1.84  |
| TTTCCTAA                  | 139              | 45               | $1.30 \times 10^{-44}$  | 1.63  |
| TTTCTAAC                  | 158              | 31               | $3.65 \times 10^{-115}$ | 2.35  |
| TTTCTAAT                  | 214              | 54               | $4.14 \times 10^{-105}$ | 1.99  |
| TTTCTGAC                  | 131              | 31               | $3.96 \times 10^{-72}$  | 2.08  |
| TTTCTGAT                  | 168              | 55               | $2.01 \times 10^{-52}$  | 1.61  |
| TTTGCTAA                  | 104              | 31               | $2.84 \times 10^{-39}$  | 1.75  |
| TTTGTAAC                  | 100              | 30               | $2.11 \times 10^{-37}$  | 1.74  |
| TTTTAACC                  | 113              | 33               | $4.38 \times 10^{-44}$  | 1.78  |
| TTTTAACT                  | 192              | 58               | $2.68 \times 10^{-69}$  | 1.73  |
| TTTTAATA                  | 81               | 27               | $2.69 \times 10^{-25}$  | 1.58  |
| TTTTCTAA                  | 251              | 81               | $1.40 \times 10^{-79}$  | 1.63  |
| TTTTGACC                  | 64               | 20               | $7.67 \times 10^{-23}$  | 1.68  |
| TTTTTAAC                  | 196              | 63               | $5.06 \times 10^{-63}$  | 1.64  |
| <b>3'SS ISS</b>           |                  |                  |                         |       |
| AAAAAAG                   | 56               | 188              | $6.12 \times 10^{-22}$  | -1.75 |
| AAAAAGA                   | 43               | 156              | $1.46 \times 10^{-19}$  | -1.86 |
| AAAAAGG                   | 19               | 73               | $2.61 \times 10^{-10}$  | -1.94 |
| AAAAAGAG                  | 14               | 70               | $2.18 \times 10^{-11}$  | -2.32 |
| AAAAAGGA                  | 21               | 74               | $7.22 \times 10^{-10}$  | -1.82 |
| AAAAGAAG                  | 18               | 75               | $4.64 \times 10^{-11}$  | -2.06 |
| AAAAGAG                   | 54               | 171              | $3.63 \times 10^{-19}$  | -1.66 |
| AAAAGAGA                  | 19               | 76               | $6.22 \times 10^{-11}$  | -2.00 |
| AAAAGGG                   | 33               | 129              | $2.85 \times 10^{-17}$  | -1.97 |
| AAAATGGA                  | 17               | 67               | $1.01 \times 10^{-09}$  | -1.98 |
| AAACAGG                   | 32               | 109              | $1.64 \times 10^{-13}$  | -1.77 |
| AAAGAAAG                  | 21               | 118              | $4.27 \times 10^{-19}$  | -2.49 |
| AAAGAAG                   | 57               | 197              | $1.96 \times 10^{-23}$  | -1.79 |
| AAAGAGG                   | 47               | 143              | $9.89 \times 10^{-16}$  | -1.61 |
| AAAGGAAG                  | 12               | 68               | $1.11 \times 10^{-11}$  | -2.50 |
| AAAGGAG                   | 34               | 167              | $7.64 \times 10^{-25}$  | -2.30 |
| AAAGGG                    | 140              | 428              | $4.64 \times 10^{-44}$  | -1.61 |
| AAAGGGA                   | 36               | 157              | $4.58 \times 10^{-22}$  | -2.12 |
| AAAGGGAA                  | 13               | 65               | $1.12 \times 10^{-10}$  | -2.32 |
| AAAGGGG                   | 18               | 105              | $2.06 \times 10^{-17}$  | -2.54 |
| AAAGTGG                   | 33               | 117              | $8.10 \times 10^{-15}$  | -1.83 |
| AACCAGG                   | 44               | 134              | $7.54 \times 10^{-15}$  | -1.61 |
| AACCCAGG                  | 22               | 71               | $6.05 \times 10^{-09}$  | -1.69 |
| Continued on next page... |                  |                  |                         |       |

Table 5 – continued from previous page

| Element  | Count next to SS | Background count | Chi-square test        | LOD   |
|----------|------------------|------------------|------------------------|-------|
| AAGAAAAG | 23               | 91               | $1.01 \times 10^{-12}$ | -1.98 |
| AAGAAAG  | 72               | 279              | $2.83 \times 10^{-35}$ | -1.95 |
| AAGAAAGA | 18               | 111              | $1.07 \times 10^{-18}$ | -2.62 |
| AAGAAAGG | 9                | 68               | $8.37 \times 10^{-13}$ | -2.92 |
| AAGAAGA  | 51               | 188              | $1.65 \times 10^{-23}$ | -1.88 |
| AAGAAGAA | 16               | 76               | $5.88 \times 10^{-12}$ | -2.25 |
| AAGAAGC  | 41               | 127              | $2.32 \times 10^{-14}$ | -1.63 |
| AAGAAGG  | 31               | 159              | $3.27 \times 10^{-24}$ | -2.36 |
| AAGAAGGA | 14               | 65               | $2.52 \times 10^{-10}$ | -2.22 |
| AAGACAG  | 41               | 130              | $5.90 \times 10^{-15}$ | -1.66 |
| AAGAGAG  | 38               | 160              | $5.15 \times 10^{-22}$ | -2.07 |
| AAGAGAGA | 16               | 69               | $1.76 \times 10^{-10}$ | -2.11 |
| AAGAGCA  | 42               | 128              | $2.92 \times 10^{-14}$ | -1.61 |
| AAGAGGA  | 44               | 180              | $3.78 \times 10^{-24}$ | -2.03 |
| AAGAGGAA | 15               | 65               | $5.58 \times 10^{-10}$ | -2.12 |
| AAGAGGG  | 26               | 133              | $1.72 \times 10^{-20}$ | -2.35 |
| AAGATAG  | 29               | 95               | $1.27 \times 10^{-11}$ | -1.71 |
| AAGATCC  | 26               | 82               | $6.24 \times 10^{-10}$ | -1.66 |
| AAGATGG  | 45               | 139              | $1.55 \times 10^{-15}$ | -1.63 |
| AAGCAAG  | 34               | 121              | $2.59 \times 10^{-15}$ | -1.83 |
| AAGCAGA  | 57               | 178              | $1.19 \times 10^{-19}$ | -1.64 |
| AAGCAGG  | 44               | 169              | $6.86 \times 10^{-22}$ | -1.94 |
| AAGGAAAG | 11               | 65               | $2.11 \times 10^{-11}$ | -2.56 |
| AAGGAAG  | 47               | 216              | $1.33 \times 10^{-30}$ | -2.20 |
| AAGGAAGA | 10               | 69               | $1.22 \times 10^{-12}$ | -2.79 |
| AAGGAAGG | 10               | 69               | $1.22 \times 10^{-12}$ | -2.79 |
| AAGGAG   | 184              | 600              | $1.05 \times 10^{-64}$ | -1.71 |
| AAGGAGA  | 42               | 185              | $7.45 \times 10^{-26}$ | -2.14 |
| AAGGAGAA | 16               | 63               | $3.19 \times 10^{-09}$ | -1.98 |
| AAGGAGAG | 11               | 66               | $1.29 \times 10^{-11}$ | -2.58 |
| AAGGAGC  | 36               | 121              | $1.10 \times 10^{-14}$ | -1.75 |
| AAGGAGG  | 37               | 183              | $3.71 \times 10^{-27}$ | -2.31 |
| AAGGCAG  | 48               | 177              | $3.12 \times 10^{-22}$ | -1.88 |
| AAGGGAA  | 55               | 172              | $4.60 \times 10^{-19}$ | -1.64 |
| AAGGGAAA | 19               | 69               | $1.75 \times 10^{-09}$ | -1.86 |
| AAGGGAG  | 34               | 149              | $4.45 \times 10^{-21}$ | -2.13 |
| AAGGGCA  | 28               | 113              | $1.28 \times 10^{-15}$ | -2.01 |
| AAGGGG   | 121              | 400              | $3.09 \times 10^{-44}$ | -1.72 |
| AAGGGGA  | 29               | 121              | $6.07 \times 10^{-17}$ | -2.06 |
| AAGGGGG  | 12               | 100              | $1.37 \times 10^{-18}$ | -3.06 |
| AAGGTAG  | 14               | 88               | $3.06 \times 10^{-15}$ | -2.65 |
| AAGTAGA  | 40               | 122              | $1.14 \times 10^{-13}$ | -1.61 |

Continued on next page...

Table 5 – continued from previous page

| Element  | Count next to SS | Background count | Chi-square test        | LOD   |
|----------|------------------|------------------|------------------------|-------|
| AAGTAGG  | 18               | 77               | $1.77 \times 10^{-11}$ | -2.10 |
| AAGTGCTG | 24               | 73               | $9.75 \times 10^{-09}$ | -1.60 |
| AAGTGGG  | 33               | 111              | $1.33 \times 10^{-13}$ | -1.75 |
| AATAGGA  | 25               | 88               | $1.87 \times 10^{-11}$ | -1.82 |
| AATAGGG  | 14               | 65               | $2.52 \times 10^{-10}$ | -2.22 |
| AATTAGG  | 21               | 75               | $4.50 \times 10^{-10}$ | -1.84 |
| ACAAGGA  | 31               | 104              | $8.16 \times 10^{-13}$ | -1.75 |
| ACAAGGG  | 20               | 76               | $1.33 \times 10^{-10}$ | -1.93 |
| ACACACAC | 89               | 321              | $2.35 \times 10^{-38}$ | -1.85 |
| ACAGAGA  | 52               | 205              | $1.18 \times 10^{-26}$ | -1.98 |
| ACAGAGAA | 19               | 70               | $1.09 \times 10^{-09}$ | -1.88 |
| ACAGAGAG | 11               | 67               | $7.83 \times 10^{-12}$ | -2.61 |
| ACAGAGG  | 52               | 162              | $5.49 \times 10^{-18}$ | -1.64 |
| ACAGCCC  | 20               | 67               | $9.35 \times 10^{-09}$ | -1.74 |
| ACAGGGA  | 38               | 125              | $7.15 \times 10^{-15}$ | -1.72 |
| ACATAGG  | 23               | 70               | $1.94 \times 10^{-08}$ | -1.61 |
| ACCAAGG  | 26               | 89               | $2.42 \times 10^{-11}$ | -1.78 |
| ACCAGGA  | 35               | 118              | $2.16 \times 10^{-14}$ | -1.75 |
| ACTAGGA  | 19               | 64               | $1.85 \times 10^{-08}$ | -1.75 |
| ACTGGGA  | 38               | 124              | $1.13 \times 10^{-14}$ | -1.71 |
| AGAAAAAG | 18               | 95               | $2.78 \times 10^{-15}$ | -2.40 |
| AGAAAAG  | 77               | 235              | $6.53 \times 10^{-25}$ | -1.61 |
| AGAAAAGA | 21               | 82               | $1.62 \times 10^{-11}$ | -1.97 |
| AGAAAAGG | 12               | 64               | $8.03 \times 10^{-11}$ | -2.42 |
| AGAAAGA  | 54               | 288              | $2.95 \times 10^{-43}$ | -2.42 |
| AGAAAGAA | 20               | 121              | $4.23 \times 10^{-20}$ | -2.60 |
| AGAAAGAG | 4                | 77               | $8.85 \times 10^{-17}$ | -4.27 |
| AGAAAGG  | 42               | 199              | $8.97 \times 10^{-29}$ | -2.24 |
| AGAAAGGA | 10               | 70               | $7.42 \times 10^{-13}$ | -2.81 |
| AGAAAGGG | 7                | 64               | $1.04 \times 10^{-12}$ | -3.19 |
| AGAAATGG | 22               | 73               | $2.38 \times 10^{-09}$ | -1.73 |
| AGAAGA   | 208              | 669              | $4.45 \times 10^{-71}$ | -1.69 |
| AGAAGAA  | 70               | 232              | $2.02 \times 10^{-26}$ | -1.73 |
| AGAAGAAA | 21               | 84               | $6.24 \times 10^{-12}$ | -2.00 |
| AGAAGAAG | 12               | 69               | $6.79 \times 10^{-12}$ | -2.52 |
| AGAAGAG  | 46               | 214              | $1.57 \times 10^{-30}$ | -2.22 |
| AGAAGAGA | 9                | 67               | $1.38 \times 10^{-12}$ | -2.90 |
| AGAAGAGG | 11               | 69               | $2.90 \times 10^{-12}$ | -2.65 |
| AGAAGCAG | 10               | 63               | $2.43 \times 10^{-11}$ | -2.66 |
| AGAAGG   | 188              | 632              | $7.97 \times 10^{-70}$ | -1.75 |
| AGAAGGA  | 43               | 223              | $1.84 \times 10^{-33}$ | -2.37 |
| AGAAGGAA | 14               | 73               | $5.00 \times 10^{-12}$ | -2.38 |

Continued on next page...

Table 5 – continued from previous page

| Element  | Count next to SS | Background count | Chi-square test         | LOD   |
|----------|------------------|------------------|-------------------------|-------|
| AGAAGGAG | 3                | 73               | $2.55 \times 10^{-16}$  | -4.60 |
| AGAAGGG  | 37               | 186              | $8.69 \times 10^{-28}$  | -2.33 |
| AGAAGGGA | 9                | 70               | $3.08 \times 10^{-13}$  | -2.96 |
| AGAATAG  | 29               | 105              | $1.20 \times 10^{-13}$  | -1.86 |
| AGAATGG  | 44               | 148              | $1.24 \times 10^{-17}$  | -1.75 |
| AGACAGA  | 57               | 185              | $4.91 \times 10^{-21}$  | -1.70 |
| AGACAGG  | 32               | 146              | $3.91 \times 10^{-21}$  | -2.19 |
| AGACCAG  | 39               | 118              | $3.52 \times 10^{-13}$  | -1.60 |
| AGACGG   | 36               | 110              | $1.72 \times 10^{-12}$  | -1.61 |
| AGACTAG  | 22               | 67               | $3.85 \times 10^{-08}$  | -1.61 |
| AGAGAAAA | 27               | 88               | $7.89 \times 10^{-11}$  | -1.70 |
| AGAGAAAG | 17               | 87               | $6.15 \times 10^{-14}$  | -2.36 |
| AGAGAAG  | 48               | 267              | $5.78 \times 10^{-41}$  | -2.48 |
| AGAGAAGA | 10               | 73               | $1.66 \times 10^{-13}$  | -2.87 |
| AGAGAAGG | 7                | 76               | $2.47 \times 10^{-15}$  | -3.44 |
| AGAGAAGT | 20               | 68               | $5.85 \times 10^{-09}$  | -1.77 |
| AGAGACA  | 42               | 172              | $3.66 \times 10^{-23}$  | -2.03 |
| AGAGACAG | 10               | 75               | $6.11 \times 10^{-14}$  | -2.91 |
| AGAGAG   | 189              | 885              | $4.25 \times 10^{-121}$ | -2.23 |
| AGAGAGA  | 55               | 409              | $1.30 \times 10^{-68}$  | -2.89 |
| AGAGAGAA | 16               | 95               | $5.26 \times 10^{-16}$  | -2.57 |
| AGAGAGAG | 13               | 234              | $2.58 \times 10^{-47}$  | -4.17 |
| AGAGAGG  | 30               | 208              | $5.34 \times 10^{-35}$  | -2.79 |
| AGAGAGGA | 8                | 63               | $4.23 \times 10^{-12}$  | -2.98 |
| AGAGAGGG | 4                | 64               | $6.38 \times 10^{-14}$  | -4.00 |
| AGAGCAA  | 42               | 133              | $3.00 \times 10^{-15}$  | -1.66 |
| AGAGCAG  | 64               | 200              | $6.77 \times 10^{-22}$  | -1.64 |
| AGAGCCAG | 14               | 71               | $1.34 \times 10^{-11}$  | -2.34 |
| AGAGCTGG | 21               | 75               | $4.50 \times 10^{-10}$  | -1.84 |
| AGAGGA   | 192              | 614              | $4.69 \times 10^{-65}$  | -1.68 |
| AGAGGAA  | 63               | 205              | $3.47 \times 10^{-23}$  | -1.70 |
| AGAGGAAA | 25               | 80               | $7.78 \times 10^{-10}$  | -1.68 |
| AGAGGAAG | 10               | 75               | $6.11 \times 10^{-14}$  | -2.91 |
| AGAGGAC  | 27               | 95               | $3.02 \times 10^{-12}$  | -1.81 |
| AGAGGAG  | 41               | 204              | $3.61 \times 10^{-30}$  | -2.31 |
| AGAGGAGA | 7                | 63               | $1.72 \times 10^{-12}$  | -3.17 |
| AGAGGAGG | 11               | 74               | $2.41 \times 10^{-13}$  | -2.75 |
| AGAGGCAG | 11               | 70               | $1.76 \times 10^{-12}$  | -2.67 |
| AGAGGG   | 184              | 560              | $7.34 \times 10^{-57}$  | -1.61 |
| AGAGGGA  | 46               | 175              | $1.81 \times 10^{-22}$  | -1.93 |
| AGAGGGAG | 5                | 72               | $2.88 \times 10^{-15}$  | -3.85 |
| AGAGGGC  | 38               | 118              | $1.77 \times 10^{-13}$  | -1.63 |

Continued on next page...

Table 5 – continued from previous page

| Element  | Count next to SS | Background count | Chi-square test        | LOD   |
|----------|------------------|------------------|------------------------|-------|
| AGAGGGG  | 37               | 134              | $5.30 \times 10^{-17}$ | -1.86 |
| AGAGTAG  | 18               | 96               | $1.71 \times 10^{-15}$ | -2.42 |
| AGAGTGG  | 35               | 127              | $3.24 \times 10^{-16}$ | -1.86 |
| AGATAG   | 93               | 312              | $2.64 \times 10^{-35}$ | -1.75 |
| AGATAGA  | 34               | 114              | $6.74 \times 10^{-14}$ | -1.75 |
| AGATAGG  | 14               | 67               | $9.48 \times 10^{-11}$ | -2.26 |
| AGATCG   | 21               | 80               | $4.21 \times 10^{-11}$ | -1.93 |
| AGATGAG  | 51               | 171              | $4.43 \times 10^{-20}$ | -1.75 |
| AGATGAGG | 8                | 67               | $5.67 \times 10^{-13}$ | -3.07 |
| AGATGGA  | 45               | 162              | $3.83 \times 10^{-20}$ | -1.85 |
| AGATGGG  | 42               | 138              | $3.03 \times 10^{-16}$ | -1.72 |
| AGATTAG  | 21               | 82               | $1.62 \times 10^{-11}$ | -1.97 |
| AGCAAAG  | 39               | 129              | $2.29 \times 10^{-15}$ | -1.73 |
| AGCAAGA  | 37               | 134              | $5.30 \times 10^{-17}$ | -1.86 |
| AGCAAGG  | 34               | 105              | $4.24 \times 10^{-12}$ | -1.63 |
| AGCAGAG  | 58               | 193              | $2.53 \times 10^{-22}$ | -1.73 |
| AGCAGAGA | 14               | 77               | $6.99 \times 10^{-13}$ | -2.46 |
| AGCAGAGG | 14               | 63               | $6.68 \times 10^{-10}$ | -2.17 |
| AGCAGAT  | 37               | 113              | $8.70 \times 10^{-13}$ | -1.61 |
| AGCAGCAG | 21               | 76               | $2.81 \times 10^{-10}$ | -1.86 |
| AGCAGGA  | 50               | 154              | $5.26 \times 10^{-17}$ | -1.62 |
| AGCAGGG  | 50               | 179              | $5.30 \times 10^{-22}$ | -1.84 |
| AGCATAG  | 19               | 67               | $4.51 \times 10^{-09}$ | -1.82 |
| AGCCAGGA | 9                | 70               | $3.08 \times 10^{-13}$ | -2.96 |
| AGCCTAG  | 23               | 75               | $1.92 \times 10^{-09}$ | -1.71 |
| AGCTAGA  | 25               | 81               | $4.90 \times 10^{-10}$ | -1.70 |
| AGCTAGG  | 15               | 95               | $2.25 \times 10^{-16}$ | -2.66 |
| AGCTCTGG | 19               | 64               | $1.85 \times 10^{-08}$ | -1.75 |
| AGCTGGAG | 23               | 69               | $3.06 \times 10^{-08}$ | -1.58 |
| AGCTGGGA | 11               | 79               | $2.00 \times 10^{-14}$ | -2.84 |
| AGCTGGGG | 19               | 65               | $1.16 \times 10^{-08}$ | -1.77 |
| AGGAAAAG | 17               | 67               | $1.01 \times 10^{-09}$ | -1.98 |
| AGGAAAG  | 49               | 218              | $2.44 \times 10^{-30}$ | -2.15 |
| AGGAAAGA | 12               | 69               | $6.79 \times 10^{-12}$ | -2.52 |
| AGGAAAGG | 9                | 66               | $2.28 \times 10^{-12}$ | -2.87 |
| AGGAAG   | 242              | 783              | $2.62 \times 10^{-83}$ | -1.69 |
| AGGAAGA  | 52               | 243              | $1.61 \times 10^{-34}$ | -2.22 |
| AGGAAGAA | 14               | 81               | $9.73 \times 10^{-14}$ | -2.53 |
| AGGAAGAG | 3                | 71               | $7.02 \times 10^{-16}$ | -4.56 |
| AGGAAGG  | 47               | 251              | $6.06 \times 10^{-38}$ | -2.42 |
| AGGAAGGA | 11               | 91               | $5.01 \times 10^{-17}$ | -3.05 |
| AGGAAGGG | 4                | 69               | $5.07 \times 10^{-15}$ | -4.11 |

Continued on next page...

Table 5 – continued from previous page

| Element  | Count next to SS | Background count | Chi-square test        | LOD   |
|----------|------------------|------------------|------------------------|-------|
| AGGACAG  | 52               | 159              | $2.14 \times 10^{-17}$ | -1.61 |
| AGGAGA   | 213              | 670              | $8.83 \times 10^{-70}$ | -1.65 |
| AGGAGAA  | 60               | 218              | $1.00 \times 10^{-26}$ | -1.86 |
| AGGAGAAG | 8                | 66               | $9.37 \times 10^{-13}$ | -3.04 |
| AGGAGAG  | 60               | 218              | $1.00 \times 10^{-26}$ | -1.86 |
| AGGAGAGA | 11               | 74               | $2.41 \times 10^{-13}$ | -2.75 |
| AGGAGAGG | 19               | 77               | $3.85 \times 10^{-11}$ | -2.02 |
| AGGAGAT  | 42               | 126              | $7.24 \times 10^{-14}$ | -1.58 |
| AGGAGCA  | 22               | 140              | $2.00 \times 10^{-23}$ | -2.67 |
| AGGAGG   | 207              | 773              | $3.71 \times 10^{-92}$ | -1.90 |
| AGGAGGA  | 29               | 223              | $1.36 \times 10^{-38}$ | -2.94 |
| AGGAGGAA | 7                | 66               | $3.80 \times 10^{-13}$ | -3.24 |
| AGGAGGAG | 7                | 86               | $1.61 \times 10^{-17}$ | -3.62 |
| AGGAGGG  | 44               | 224              | $2.55 \times 10^{-33}$ | -2.35 |
| AGGAGGGA | 10               | 73               | $1.66 \times 10^{-13}$ | -2.87 |
| AGGAGGGG | 7                | 79               | $5.46 \times 10^{-16}$ | -3.50 |
| AGGAGGT  | 46               | 141              | $1.24 \times 10^{-15}$ | -1.62 |
| AGGAGGTG | 18               | 64               | $8.92 \times 10^{-09}$ | -1.83 |
| AGGATAG  | 17               | 66               | $1.62 \times 10^{-09}$ | -1.96 |
| AGGATGG  | 43               | 140              | $2.44 \times 10^{-16}$ | -1.70 |
| AGGCAAA  | 41               | 128              | $1.47 \times 10^{-14}$ | -1.64 |
| AGGCAAG  | 35               | 129              | $1.27 \times 10^{-16}$ | -1.88 |
| AGGCAGA  | 44               | 223              | $4.14 \times 10^{-33}$ | -2.34 |
| AGGCAGAG | 13               | 103              | $7.44 \times 10^{-19}$ | -2.99 |
| AGGCAGG  | 64               | 248              | $1.53 \times 10^{-31}$ | -1.95 |
| AGGCAGGA | 9                | 87               | $6.13 \times 10^{-17}$ | -3.27 |
| AGGCTGGG | 23               | 86               | $1.09 \times 10^{-11}$ | -1.90 |
| AGGGAAA  | 68               | 206              | $6.89 \times 10^{-22}$ | -1.60 |
| AGGGAAAA | 18               | 66               | $3.45 \times 10^{-09}$ | -1.87 |
| AGGGAAG  | 30               | 214              | $2.77 \times 10^{-36}$ | -2.83 |
| AGGGAAGA | 17               | 66               | $1.62 \times 10^{-09}$ | -1.96 |
| AGGGAAGG | 7                | 66               | $3.80 \times 10^{-13}$ | -3.24 |
| AGGGAG   | 215              | 725              | $4.96 \times 10^{-80}$ | -1.75 |
| AGGGAGA  | 54               | 220              | $4.45 \times 10^{-29}$ | -2.03 |
| AGGGAGAA | 11               | 69               | $2.90 \times 10^{-12}$ | -2.65 |
| AGGGAGAG | 10               | 79               | $8.28 \times 10^{-15}$ | -2.98 |
| AGGGAGG  | 48               | 222              | $1.64 \times 10^{-31}$ | -2.21 |
| AGGGAGGA | 10               | 63               | $2.43 \times 10^{-11}$ | -2.66 |
| AGGGAGGG | 15               | 101              | $1.15 \times 10^{-17}$ | -2.75 |
| AGGGCAGG | 23               | 86               | $1.09 \times 10^{-11}$ | -1.90 |
| AGGGCTGG | 22               | 66               | $6.09 \times 10^{-08}$ | -1.58 |
| AGGGGAA  | 32               | 150              | $5.69 \times 10^{-22}$ | -2.23 |

Continued on next page...



Table 5 – continued from previous page

| Element  | Count next to SS | Background count | Chi-square test        | LOD   |
|----------|------------------|------------------|------------------------|-------|
| AGGGGAAG | 6                | 73               | $4.44 \times 10^{-15}$ | -3.60 |
| AGGGGAG  | 38               | 185              | $3.15 \times 10^{-27}$ | -2.28 |
| AGGGGAGG | 10               | 76               | $3.71 \times 10^{-14}$ | -2.93 |
| AGGGGAT  | 26               | 83               | $3.93 \times 10^{-10}$ | -1.67 |
| AGGGGCAG | 16               | 70               | $1.09 \times 10^{-10}$ | -2.13 |
| AGGGGG   | 143              | 450              | $1.78 \times 10^{-47}$ | -1.65 |
| AGGGGGA  | 32               | 151              | $3.51 \times 10^{-22}$ | -2.24 |
| AGGGGGAG | 6                | 64               | $4.16 \times 10^{-13}$ | -3.42 |
| AGGGGGG  | 12               | 94               | $2.72 \times 10^{-17}$ | -2.97 |
| AGGGTAG  | 20               | 80               | $1.97 \times 10^{-11}$ | -2.00 |
| AGGGTGGG | 19               | 65               | $1.16 \times 10^{-08}$ | -1.77 |
| AGGTAAG  | 28               | 108              | $1.38 \times 10^{-14}$ | -1.95 |
| AGGTAG   | 92               | 309              | $5.15 \times 10^{-35}$ | -1.75 |
| AGGTAGA  | 26               | 96               | $9.03 \times 10^{-13}$ | -1.88 |
| AGGTAGC  | 18               | 66               | $3.45 \times 10^{-09}$ | -1.87 |
| AGGTAGG  | 16               | 111              | $1.93 \times 10^{-19}$ | -2.79 |
| AGGTATG  | 28               | 85               | $6.30 \times 10^{-10}$ | -1.60 |
| AGGTGAG  | 60               | 185              | $3.91 \times 10^{-20}$ | -1.62 |
| AGGTGAGG | 12               | 71               | $2.52 \times 10^{-12}$ | -2.56 |
| AGGTGGA  | 38               | 149              | $9.57 \times 10^{-20}$ | -1.97 |
| AGGTGGAG | 9                | 65               | $3.76 \times 10^{-12}$ | -2.85 |
| AGGTGGG  | 56               | 202              | $9.33 \times 10^{-25}$ | -1.85 |
| AGGTGGGA | 8                | 64               | $2.56 \times 10^{-12}$ | -3.00 |
| AGGTGGGG | 12               | 67               | $1.82 \times 10^{-11}$ | -2.48 |
| AGGTTAG  | 10               | 66               | $5.45 \times 10^{-12}$ | -2.72 |
| AGGTTGC  | 31               | 103              | $1.30 \times 10^{-12}$ | -1.73 |
| AGGTTGG  | 24               | 107              | $1.02 \times 10^{-15}$ | -2.16 |
| AGTACAG  | 28               | 104              | $9.15 \times 10^{-14}$ | -1.89 |
| AGTAGAA  | 40               | 127              | $1.16 \times 10^{-14}$ | -1.67 |
| AGTAGAG  | 19               | 123              | $6.75 \times 10^{-21}$ | -2.69 |
| AGTAGCA  | 26               | 79               | $2.48 \times 10^{-09}$ | -1.60 |
| AGTAGG   | 91               | 284              | $2.27 \times 10^{-30}$ | -1.64 |
| AGTAGGA  | 20               | 69               | $3.66 \times 10^{-09}$ | -1.79 |
| AGTAGGG  | 9                | 69               | $5.08 \times 10^{-13}$ | -2.94 |
| AGTATAG  | 15               | 65               | $5.58 \times 10^{-10}$ | -2.12 |
| AGTCAGA  | 41               | 136              | $3.75 \times 10^{-16}$ | -1.73 |
| AGTCCAG  | 34               | 119              | $6.59 \times 10^{-15}$ | -1.81 |
| AGTCCCAG | 19               | 63               | $2.96 \times 10^{-08}$ | -1.73 |
| AGTCTAG  | 14               | 65               | $2.52 \times 10^{-10}$ | -2.22 |
| AGTGAGG  | 44               | 132              | $1.86 \times 10^{-14}$ | -1.58 |
| AGTGCAG  | 40               | 122              | $1.14 \times 10^{-13}$ | -1.61 |
| AGTGCTGG | 12               | 86               | $1.47 \times 10^{-15}$ | -2.84 |

Continued on next page...

Table 5 – continued from previous page

| Element  | Count next to SS | Background count | Chi-square test        | LOD   |
|----------|------------------|------------------|------------------------|-------|
| AGTGGAG  | 32               | 139              | $1.13 \times 10^{-19}$ | -2.12 |
| AGTGGGA  | 36               | 133              | $4.06 \times 10^{-17}$ | -1.89 |
| AGTGGGG  | 32               | 151              | $3.51 \times 10^{-22}$ | -2.24 |
| AGTGTAG  | 22               | 72               | $3.80 \times 10^{-09}$ | -1.71 |
| AGTTCAG  | 41               | 141              | $3.71 \times 10^{-17}$ | -1.78 |
| AGTTGGA  | 32               | 104              | $1.66 \times 10^{-12}$ | -1.70 |
| AGTTGGG  | 27               | 118              | $5.41 \times 10^{-17}$ | -2.13 |
| ATACAGG  | 25               | 79               | $1.24 \times 10^{-09}$ | -1.66 |
| ATAGAGG  | 15               | 72               | $1.85 \times 10^{-11}$ | -2.26 |
| ATAGGAA  | 36               | 128              | $4.22 \times 10^{-16}$ | -1.83 |
| ATAGGAG  | 20               | 66               | $1.49 \times 10^{-08}$ | -1.72 |
| ATAGGCA  | 19               | 69               | $1.75 \times 10^{-09}$ | -1.86 |
| ATAGGG   | 66               | 243              | $6.99 \times 10^{-30}$ | -1.88 |
| ATAGGGA  | 19               | 77               | $3.85 \times 10^{-11}$ | -2.02 |
| ATAGGGT  | 19               | 70               | $1.09 \times 10^{-09}$ | -1.88 |
| ATATGGG  | 26               | 83               | $3.93 \times 10^{-10}$ | -1.67 |
| ATCAAGG  | 18               | 69               | $8.26 \times 10^{-10}$ | -1.94 |
| ATCAGAG  | 35               | 108              | $2.15 \times 10^{-12}$ | -1.63 |
| ATCCACC  | 28               | 85               | $6.30 \times 10^{-10}$ | -1.60 |
| ATCCAGG  | 30               | 104              | $3.97 \times 10^{-13}$ | -1.79 |
| ATCGAG   | 23               | 78               | $4.74 \times 10^{-10}$ | -1.76 |
| ATCGGG   | 20               | 77               | $8.26 \times 10^{-11}$ | -1.94 |
| ATGAAGAA | 22               | 68               | $2.43 \times 10^{-08}$ | -1.63 |
| ATGAGAG  | 32               | 96               | $6.49 \times 10^{-11}$ | -1.58 |
| ATGGAAG  | 47               | 142              | $1.56 \times 10^{-15}$ | -1.60 |
| ATGGAGG  | 39               | 133              | $3.61 \times 10^{-16}$ | -1.77 |
| ATGGGAG  | 33               | 125              | $1.89 \times 10^{-16}$ | -1.92 |
| ATGGGGA  | 42               | 173              | $2.28 \times 10^{-23}$ | -2.04 |
| ATGGGGG  | 24               | 103              | $7.01 \times 10^{-15}$ | -2.10 |
| ATGTAGG  | 18               | 66               | $3.45 \times 10^{-09}$ | -1.87 |
| ATTACAGG | 9                | 71               | $1.86 \times 10^{-13}$ | -2.98 |
| ATTAGCA  | 28               | 92               | $2.51 \times 10^{-11}$ | -1.72 |
| ATTGCAG  | 36               | 116              | $1.10 \times 10^{-13}$ | -1.69 |
| ATTGGAG  | 27               | 81               | $1.97 \times 10^{-09}$ | -1.58 |
| ATTGGCA  | 28               | 91               | $3.99 \times 10^{-11}$ | -1.70 |
| ATTGGGA  | 28               | 105              | $5.71 \times 10^{-14}$ | -1.91 |
| ATTGGGG  | 19               | 75               | $1.00 \times 10^{-10}$ | -1.98 |
| ATTTTAGA | 23               | 70               | $1.94 \times 10^{-08}$ | -1.61 |
| CAAAAAAA | 37               | 146              | $1.86 \times 10^{-19}$ | -1.98 |
| CAAAGGG  | 26               | 100              | $1.36 \times 10^{-13}$ | -1.94 |
| CAAAGGG  | 31               | 104              | $8.16 \times 10^{-13}$ | -1.75 |
| CAACAAG  | 23               | 73               | $4.85 \times 10^{-09}$ | -1.67 |

Continued on next page...

Table 5 – continued from previous page

| Element  | Count next to SS | Background count | Chi-square test        | LOD   |
|----------|------------------|------------------|------------------------|-------|
| CAACAGA  | 29               | 103              | $3.06 \times 10^{-13}$ | -1.83 |
| CAAGAAG  | 25               | 144              | $3.51 \times 10^{-23}$ | -2.53 |
| CAAGAGA  | 37               | 126              | $2.21 \times 10^{-15}$ | -1.77 |
| CAAGAGG  | 26               | 110              | $1.15 \times 10^{-15}$ | -2.08 |
| CAAGGA   | 149              | 448              | $2.56 \times 10^{-45}$ | -1.59 |
| CAAGGAA  | 35               | 117              | $3.43 \times 10^{-14}$ | -1.74 |
| CAAGGAG  | 27               | 135              | $1.47 \times 10^{-20}$ | -2.32 |
| CAAGGGA  | 31               | 104              | $8.16 \times 10^{-13}$ | -1.75 |
| CAAGTAG  | 21               | 71               | $2.96 \times 10^{-09}$ | -1.76 |
| CACACACA | 92               | 359              | $4.21 \times 10^{-45}$ | -1.96 |
| CACAGAGA | 20               | 64               | $3.80 \times 10^{-08}$ | -1.68 |
| CACTCCAG | 23               | 72               | $7.70 \times 10^{-09}$ | -1.65 |
| CACTGCAC | 14               | 65               | $2.52 \times 10^{-10}$ | -2.22 |
| CAGAAAAA | 27               | 81               | $1.97 \times 10^{-09}$ | -1.58 |
| CAGAAAG  | 54               | 164              | $8.71 \times 10^{-18}$ | -1.60 |
| CAGAAGA  | 48               | 172              | $3.22 \times 10^{-21}$ | -1.84 |
| CAGAAGG  | 42               | 191              | $4.20 \times 10^{-27}$ | -2.19 |
| CAGAAGGA | 4                | 70               | $3.06 \times 10^{-15}$ | -4.13 |
| CAGAGAA  | 69               | 230              | $2.50 \times 10^{-26}$ | -1.74 |
| CAGAGAAA | 22               | 80               | $8.89 \times 10^{-11}$ | -1.86 |
| CAGAGAAG | 12               | 74               | $5.70 \times 10^{-13}$ | -2.62 |
| CAGAGAG  | 49               | 216              | $6.36 \times 10^{-30}$ | -2.14 |
| CAGAGAGA | 11               | 73               | $3.97 \times 10^{-13}$ | -2.73 |
| CAGAGAGG | 6                | 67               | $9.16 \times 10^{-14}$ | -3.48 |
| CAGAGCAG | 19               | 71               | $6.77 \times 10^{-10}$ | -1.90 |
| CAGAGGA  | 59               | 205              | $2.03 \times 10^{-24}$ | -1.80 |
| CAGAGGAA | 16               | 66               | $7.52 \times 10^{-10}$ | -2.04 |
| CAGAGGAG | 14               | 65               | $2.52 \times 10^{-10}$ | -2.22 |
| CAGAGGG  | 62               | 198              | $4.23 \times 10^{-22}$ | -1.68 |
| CAGAGGGA | 14               | 73               | $5.00 \times 10^{-12}$ | -2.38 |
| CAGATAG  | 21               | 74               | $7.22 \times 10^{-10}$ | -1.82 |
| CAGATGAG | 8                | 67               | $5.67 \times 10^{-13}$ | -3.07 |
| CAGCAGA  | 51               | 168              | $1.76 \times 10^{-19}$ | -1.72 |
| CAGCAGCA | 22               | 67               | $3.85 \times 10^{-08}$ | -1.61 |
| CAGCTAC  | 30               | 97               | $1.02 \times 10^{-11}$ | -1.69 |
| CAGGAAG  | 69               | 219              | $3.80 \times 10^{-24}$ | -1.67 |
| CAGGAAGG | 11               | 73               | $3.97 \times 10^{-13}$ | -2.73 |
| CAGGAGA  | 64               | 206              | $4.42 \times 10^{-23}$ | -1.69 |
| CAGGAGAA | 15               | 71               | $3.01 \times 10^{-11}$ | -2.24 |
| CAGGAGAG | 17               | 63               | $6.81 \times 10^{-09}$ | -1.89 |
| CAGGAGG  | 71               | 251              | $6.46 \times 10^{-30}$ | -1.82 |
| CAGGAGGA | 10               | 64               | $1.48 \times 10^{-11}$ | -2.68 |

Continued on next page...

Table 5 – continued from previous page

| Element  | Count next to SS | Background count | Chi-square test        | LOD   |
|----------|------------------|------------------|------------------------|-------|
| CAGGAGGC | 22               | 84               | $1.33 \times 10^{-11}$ | -1.93 |
| CAGGCTGG | 29               | 105              | $1.20 \times 10^{-13}$ | -1.86 |
| CAGGGAA  | 52               | 172              | $5.68 \times 10^{-20}$ | -1.73 |
| CAGGGAAG | 11               | 65               | $2.11 \times 10^{-11}$ | -2.56 |
| CAGGGAGA | 19               | 66               | $7.23 \times 10^{-09}$ | -1.80 |
| CAGGGAGG | 20               | 66               | $1.49 \times 10^{-08}$ | -1.72 |
| CAGGGGA  | 39               | 157              | $4.61 \times 10^{-21}$ | -2.01 |
| CAGGGTA  | 22               | 84               | $1.33 \times 10^{-11}$ | -1.93 |
| CAGGTGGG | 18               | 74               | $7.52 \times 10^{-11}$ | -2.04 |
| CATAGAG  | 26               | 78               | $3.91 \times 10^{-09}$ | -1.58 |
| CATAGGA  | 19               | 75               | $1.00 \times 10^{-10}$ | -1.98 |
| CATAGGG  | 20               | 66               | $1.49 \times 10^{-08}$ | -1.72 |
| CATTAGG  | 20               | 65               | $2.38 \times 10^{-08}$ | -1.70 |
| CCAAAAAA | 15               | 71               | $3.01 \times 10^{-11}$ | -2.24 |
| CCAAGAA  | 35               | 118              | $2.16 \times 10^{-14}$ | -1.75 |
| CCAAGAG  | 34               | 111              | $2.70 \times 10^{-13}$ | -1.71 |
| CCAAGGA  | 30               | 122              | $8.12 \times 10^{-17}$ | -2.02 |
| CCACTGCA | 17               | 77               | $8.04 \times 10^{-12}$ | -2.18 |
| CCAGGAG  | 66               | 266              | $1.42 \times 10^{-34}$ | -2.01 |
| CCAGGAGA | 18               | 63               | $1.43 \times 10^{-08}$ | -1.81 |
| CCAGGAGG | 11               | 74               | $2.41 \times 10^{-13}$ | -2.75 |
| CCAGGAGT | 13               | 67               | $4.19 \times 10^{-11}$ | -2.37 |
| CCAGGGAG | 20               | 65               | $2.38 \times 10^{-08}$ | -1.70 |
| CCATAGA  | 17               | 65               | $2.62 \times 10^{-09}$ | -1.93 |
| CCATAGG  | 15               | 64               | $9.06 \times 10^{-10}$ | -2.09 |
| CCCAAAG  | 51               | 155              | $6.61 \times 10^{-17}$ | -1.60 |
| CCCAGCTA | 13               | 65               | $1.12 \times 10^{-10}$ | -2.32 |
| CCCAGGAG | 22               | 77               | $3.66 \times 10^{-10}$ | -1.81 |
| CCCAGGGA | 22               | 72               | $3.80 \times 10^{-09}$ | -1.71 |
| CCCCGGC  | 14               | 68               | $5.81 \times 10^{-11}$ | -2.28 |
| CCCCGCC  | 26               | 81               | $9.89 \times 10^{-10}$ | -1.64 |
| CCCTAGA  | 22               | 71               | $6.05 \times 10^{-09}$ | -1.69 |
| CCGGGAG  | 20               | 78               | $5.12 \times 10^{-11}$ | -1.96 |
| CCTAGGA  | 22               | 85               | $8.29 \times 10^{-12}$ | -1.95 |
| CCTAGGG  | 20               | 65               | $2.38 \times 10^{-08}$ | -1.70 |
| CCTCCCAA | 24               | 74               | $6.16 \times 10^{-09}$ | -1.62 |
| CCTGCAGA | 17               | 63               | $6.81 \times 10^{-09}$ | -1.89 |
| CCTGCAGG | 17               | 91               | $8.66 \times 10^{-15}$ | -2.42 |
| CCTGGAGA | 19               | 63               | $2.96 \times 10^{-08}$ | -1.73 |
| CCTGGAGG | 20               | 79               | $3.18 \times 10^{-11}$ | -1.98 |
| CCTGGGAG | 19               | 82               | $3.47 \times 10^{-12}$ | -2.11 |
| CCTGGGCA | 29               | 97               | $5.04 \times 10^{-12}$ | -1.74 |

Continued on next page...

Table 5 – continued from previous page

| Element  | Count next to SS | Background count | Chi-square test        | LOD   |
|----------|------------------|------------------|------------------------|-------|
| CCTGGGGG | 15               | 81               | $2.24 \times 10^{-13}$ | -2.43 |
| CGAACT   | 19               | 67               | $4.51 \times 10^{-09}$ | -1.82 |
| CGAGAA   | 21               | 90               | $3.51 \times 10^{-13}$ | -2.10 |
| CGAGGA   | 45               | 135              | $9.47 \times 10^{-15}$ | -1.58 |
| CGGGAGG  | 16               | 67               | $4.64 \times 10^{-10}$ | -2.07 |
| CGGGGAG  | 24               | 74               | $6.16 \times 10^{-09}$ | -1.62 |
| CTACAGG  | 28               | 95               | $6.23 \times 10^{-12}$ | -1.76 |
| CTACGA   | 18               | 65               | $5.55 \times 10^{-09}$ | -1.85 |
| CTAGAGA  | 26               | 98               | $3.51 \times 10^{-13}$ | -1.91 |
| CTAGAGG  | 17               | 78               | $4.95 \times 10^{-12}$ | -2.20 |
| CTAGGAA  | 28               | 106              | $3.56 \times 10^{-14}$ | -1.92 |
| CTAGGAG  | 22               | 78               | $2.28 \times 10^{-10}$ | -1.83 |
| CTAGGAT  | 23               | 69               | $3.06 \times 10^{-08}$ | -1.58 |
| CTAGGCA  | 23               | 74               | $3.05 \times 10^{-09}$ | -1.69 |
| CTAGGG   | 75               | 228              | $3.94 \times 10^{-24}$ | -1.60 |
| CTAGGGA  | 24               | 76               | $2.45 \times 10^{-09}$ | -1.66 |
| CTATAGA  | 19               | 63               | $2.96 \times 10^{-08}$ | -1.73 |
| CTATGGG  | 20               | 69               | $3.66 \times 10^{-09}$ | -1.79 |
| CTCCAAA  | 13               | 63               | $2.99 \times 10^{-10}$ | -2.28 |
| CTCCCAGG | 24               | 85               | $3.68 \times 10^{-11}$ | -1.82 |
| CTGAGGCA | 26               | 85               | $1.56 \times 10^{-10}$ | -1.71 |
| CTGCACTC | 19               | 73               | $2.61 \times 10^{-10}$ | -1.94 |
| CTGCAGAG | 23               | 78               | $4.74 \times 10^{-10}$ | -1.76 |
| CTGCAGG  | 83               | 252              | $1.81 \times 10^{-26}$ | -1.60 |
| CTGCAGGA | 13               | 65               | $1.12 \times 10^{-10}$ | -2.32 |
| CTGCAGGG | 19               | 63               | $2.96 \times 10^{-08}$ | -1.73 |
| CTGCAGGT | 21               | 66               | $3.04 \times 10^{-08}$ | -1.65 |
| CTGGAAG  | 57               | 177              | $1.88 \times 10^{-19}$ | -1.63 |
| CTGGAGA  | 50               | 192              | $1.20 \times 10^{-24}$ | -1.94 |
| CTGGAGAA | 13               | 65               | $1.12 \times 10^{-10}$ | -2.32 |
| CTGGAGG  | 71               | 234              | $1.63 \times 10^{-26}$ | -1.72 |
| CTGGAGGA | 8                | 71               | $7.61 \times 10^{-14}$ | -3.15 |
| CTGGGAA  | 61               | 197              | $3.33 \times 10^{-22}$ | -1.69 |
| CTGGGAAG | 21               | 65               | $4.83 \times 10^{-08}$ | -1.63 |
| CTGGGAG  | 70               | 241              | $3.21 \times 10^{-28}$ | -1.78 |
| CTGGGAGG | 13               | 75               | $8.11 \times 10^{-13}$ | -2.53 |
| CTGGGATT | 30               | 97               | $1.02 \times 10^{-11}$ | -1.69 |
| CTGGGCAG | 23               | 73               | $4.85 \times 10^{-09}$ | -1.67 |
| CTGGGGAG | 18               | 80               | $4.15 \times 10^{-12}$ | -2.15 |
| CTGGGTGG | 18               | 65               | $5.55 \times 10^{-09}$ | -1.85 |
| CTGTAGA  | 40               | 124              | $4.57 \times 10^{-14}$ | -1.63 |
| CTGTAGG  | 27               | 93               | $7.70 \times 10^{-12}$ | -1.78 |

Continued on next page...

Table 5 – continued from previous page

| Element  | Count next to SS | Background count | Chi-square test        | LOD   |
|----------|------------------|------------------|------------------------|-------|
| CTGTGGGA | 21               | 63               | $1.21 \times 10^{-07}$ | -1.58 |
| CTGTGTGG | 21               | 66               | $3.04 \times 10^{-08}$ | -1.65 |
| CTTCCAG  | 21               | 69               | $7.53 \times 10^{-09}$ | -1.72 |
| CTTCCCAG | 24               | 73               | $9.75 \times 10^{-09}$ | -1.60 |
| CTTGCAG  | 36               | 121              | $1.10 \times 10^{-14}$ | -1.75 |
| CTTGGAG  | 44               | 137              | $1.93 \times 10^{-15}$ | -1.64 |
| CTTGGGA  | 43               | 157              | $9.16 \times 10^{-20}$ | -1.87 |
| CTTGGGAG | 8                | 65               | $1.55 \times 10^{-12}$ | -3.02 |
| CTTGGGG  | 55               | 168              | $2.82 \times 10^{-18}$ | -1.61 |
| CTTTAGA  | 40               | 121              | $1.79 \times 10^{-13}$ | -1.60 |
| CTTTAGG  | 30               | 92               | $1.02 \times 10^{-10}$ | -1.62 |
| GAAAAAAG | 21               | 64               | $7.66 \times 10^{-08}$ | -1.61 |
| GAAAAAG  | 55               | 193              | $2.97 \times 10^{-23}$ | -1.81 |
| GAAAAAGA | 16               | 72               | $4.12 \times 10^{-11}$ | -2.17 |
| GAAAAGAA | 29               | 90               | $1.28 \times 10^{-10}$ | -1.63 |
| GAAAAGG  | 42               | 165              | $1.01 \times 10^{-21}$ | -1.97 |
| GAAAAGGA | 13               | 64               | $1.83 \times 10^{-10}$ | -2.30 |
| GAAAGAA  | 77               | 247              | $2.85 \times 10^{-27}$ | -1.68 |
| GAAAGAAA | 32               | 112              | $4.05 \times 10^{-14}$ | -1.81 |
| GAAAGAG  | 43               | 179              | $2.83 \times 10^{-24}$ | -2.06 |
| GAAAGAGA | 16               | 65               | $1.22 \times 10^{-09}$ | -2.02 |
| GAAAGG   | 168              | 547              | $4.52 \times 10^{-59}$ | -1.70 |
| GAAAGGA  | 41               | 176              | $2.53 \times 10^{-24}$ | -2.10 |
| GAAAGGAA | 22               | 75               | $9.36 \times 10^{-10}$ | -1.77 |
| GAAAGGG  | 19               | 147              | $4.69 \times 10^{-26}$ | -2.95 |
| GAAATGGA | 18               | 69               | $8.26 \times 10^{-10}$ | -1.94 |
| GAACAGG  | 24               | 98               | $7.70 \times 10^{-14}$ | -2.03 |
| GAACTAG  | 17               | 64               | $4.23 \times 10^{-09}$ | -1.91 |
| GAACTGG  | 30               | 103              | $6.34 \times 10^{-13}$ | -1.78 |
| GAAGAAG  | 39               | 184              | $1.13 \times 10^{-26}$ | -2.24 |
| GAAGAAGA | 9                | 68               | $8.37 \times 10^{-13}$ | -2.92 |
| GAAGAG   | 189              | 567              | $9.23 \times 10^{-57}$ | -1.58 |
| GAAGAGA  | 41               | 189              | $4.99 \times 10^{-27}$ | -2.20 |
| GAAGAGAA | 10               | 66               | $5.45 \times 10^{-12}$ | -2.72 |
| GAAGAGG  | 43               | 166              | $1.34 \times 10^{-21}$ | -1.95 |
| GAAGAGGA | 11               | 63               | $5.70 \times 10^{-11}$ | -2.52 |
| GAAGCAG  | 54               | 190              | $5.79 \times 10^{-23}$ | -1.81 |
| GAAGCAGG | 9                | 63               | $1.02 \times 10^{-11}$ | -2.81 |
| GAAGGA   | 183              | 593              | $1.27 \times 10^{-63}$ | -1.70 |
| GAAGGAA  | 59               | 224              | $2.89 \times 10^{-28}$ | -1.92 |
| GAAGGAAA | 16               | 85               | $7.20 \times 10^{-14}$ | -2.41 |
| GAAGGAAG | 13               | 81               | $4.17 \times 10^{-14}$ | -2.64 |

Continued on next page...

Table 5 – continued from previous page

| Element  | Count next to SS | Background count | Chi-square test         | LOD   |
|----------|------------------|------------------|-------------------------|-------|
| GAAGGAG  | 37               | 206              | $5.23 \times 10^{-32}$  | -2.48 |
| GAAGGAGA | 6                | 65               | $2.51 \times 10^{-13}$  | -3.44 |
| GAAGGAGG | 9                | 63               | $1.02 \times 10^{-11}$  | -2.81 |
| GAAGGCA  | 40               | 131              | $1.85 \times 10^{-15}$  | -1.71 |
| GAAGGG   | 151              | 489              | $9.41 \times 10^{-53}$  | -1.70 |
| GAAGGGA  | 36               | 185              | $6.28 \times 10^{-28}$  | -2.36 |
| GAAGGGG  | 30               | 148              | $3.02 \times 10^{-22}$  | -2.30 |
| GAAGTAG  | 31               | 101              | $3.27 \times 10^{-12}$  | -1.70 |
| GAAGTGG  | 35               | 128              | $2.03 \times 10^{-16}$  | -1.87 |
| GAATGGG  | 31               | 107              | $2.02 \times 10^{-13}$  | -1.79 |
| GAATTGG  | 28               | 86               | $3.99 \times 10^{-10}$  | -1.62 |
| GACAGAG  | 65               | 199              | $2.11 \times 10^{-21}$  | -1.61 |
| GACAGAGA | 13               | 70               | $9.56 \times 10^{-12}$  | -2.43 |
| GAGAAAG  | 56               | 229              | $2.87 \times 10^{-30}$  | -2.03 |
| GAGAAAGA | 8                | 81               | $5.01 \times 10^{-16}$  | -3.34 |
| GAGAAAGG | 14               | 65               | $2.52 \times 10^{-10}$  | -2.22 |
| GAGAAG   | 176              | 652              | $1.41 \times 10^{-77}$  | -1.89 |
| GAGAAGA  | 34               | 171              | $1.10 \times 10^{-25}$  | -2.33 |
| GAGAAGAA | 16               | 63               | $3.19 \times 10^{-09}$  | -1.98 |
| GAGAAGC  | 31               | 135              | $3.52 \times 10^{-19}$  | -2.12 |
| GAGAAGG  | 41               | 219              | $2.51 \times 10^{-33}$  | -2.42 |
| GAGAAGGA | 9                | 77               | $9.23 \times 10^{-15}$  | -3.10 |
| GAGAAGGG | 7                | 72               | $1.85 \times 10^{-14}$  | -3.36 |
| GAGACAG  | 36               | 179              | $1.15 \times 10^{-26}$  | -2.31 |
| GAGAGA   | 214              | 836              | $1.10 \times 10^{-102}$ | -1.97 |
| GAGAGAA  | 58               | 206              | $6.21 \times 10^{-25}$  | -1.83 |
| GAGAGAAA | 20               | 76               | $1.33 \times 10^{-10}$  | -1.93 |
| GAGAGAAG | 9                | 74               | $4.15 \times 10^{-14}$  | -3.04 |
| GAGAGAG  | 53               | 390              | $2.65 \times 10^{-65}$  | -2.88 |
| GAGAGAGA | 14               | 223              | $1.64 \times 10^{-44}$  | -3.99 |
| GAGAGAGG | 6                | 69               | $3.34 \times 10^{-14}$  | -3.52 |
| GAGAGCA  | 47               | 143              | $9.89 \times 10^{-16}$  | -1.61 |
| GAGAGG   | 182              | 547              | $6.41 \times 10^{-55}$  | -1.59 |
| GAGAGGA  | 41               | 171              | $2.74 \times 10^{-23}$  | -2.06 |
| GAGAGGAG | 12               | 67               | $1.82 \times 10^{-11}$  | -2.48 |
| GAGAGGG  | 37               | 176              | $1.09 \times 10^{-25}$  | -2.25 |
| GAGAGGGA | 7                | 63               | $1.72 \times 10^{-12}$  | -3.17 |
| GAGATAG  | 17               | 74               | $3.44 \times 10^{-11}$  | -2.12 |
| GAGATGG  | 51               | 158              | $1.70 \times 10^{-17}$  | -1.63 |
| GAGCAAG  | 30               | 113              | $5.80 \times 10^{-15}$  | -1.91 |
| GAGCACA  | 36               | 115              | $1.75 \times 10^{-13}$  | -1.68 |
| GAGCAGGG | 14               | 63               | $6.68 \times 10^{-10}$  | -2.17 |

Continued on next page...

Table 5 – continued from previous page

| Element  | Count next to SS | Background count | Chi-square test        | LOD   |
|----------|------------------|------------------|------------------------|-------|
| GAGCCACC | 27               | 88               | $7.89 \times 10^{-11}$ | -1.70 |
| GAGCCAGG | 23               | 78               | $4.74 \times 10^{-10}$ | -1.76 |
| GAGCTAG  | 15               | 69               | $7.98 \times 10^{-11}$ | -2.20 |
| GAGCTGG  | 78               | 236              | $8.20 \times 10^{-25}$ | -1.60 |
| GAGCTGGA | 15               | 74               | $6.95 \times 10^{-12}$ | -2.30 |
| GAGCTGGG | 22               | 81               | $5.54 \times 10^{-11}$ | -1.88 |
| GAGGAA   | 205              | 636              | $1.69 \times 10^{-65}$ | -1.63 |
| GAGGAAAA | 20               | 66               | $1.49 \times 10^{-08}$ | -1.72 |
| GAGGAAG  | 47               | 220              | $1.94 \times 10^{-31}$ | -2.23 |
| GAGGAAGA | 10               | 73               | $1.66 \times 10^{-13}$ | -2.87 |
| GAGGAAGG | 12               | 75               | $3.47 \times 10^{-13}$ | -2.64 |
| GAGGAG   | 174              | 700              | $5.61 \times 10^{-88}$ | -2.01 |
| GAGGAGA  | 46               | 190              | $1.51 \times 10^{-25}$ | -2.05 |
| GAGGAGAA | 6                | 66               | $1.52 \times 10^{-13}$ | -3.46 |
| GAGGAGC  | 38               | 145              | $6.33 \times 10^{-19}$ | -1.93 |
| GAGGAGG  | 41               | 272              | $1.41 \times 10^{-44}$ | -2.73 |
| GAGGAGGA | 9                | 107              | $2.69 \times 10^{-21}$ | -3.57 |
| GAGGAGGG | 8                | 73               | $2.79 \times 10^{-14}$ | -3.19 |
| GAGGATC  | 25               | 79               | $1.24 \times 10^{-09}$ | -1.66 |
| GAGGCAG  | 51               | 258              | $5.26 \times 10^{-38}$ | -2.34 |
| GAGGCAGA | 10               | 85               | $4.12 \times 10^{-16}$ | -3.09 |
| GAGGCAGG | 11               | 95               | $6.79 \times 10^{-18}$ | -3.11 |
| GAGGCGG  | 16               | 65               | $1.22 \times 10^{-09}$ | -2.02 |
| GAGGCTGG | 21               | 73               | $1.16 \times 10^{-09}$ | -1.80 |
| GAGGGA   | 180              | 601              | $4.08 \times 10^{-66}$ | -1.74 |
| GAGGGAA  | 41               | 179              | $6.03 \times 10^{-25}$ | -2.13 |
| GAGGGAG  | 47               | 246              | $6.85 \times 10^{-37}$ | -2.39 |
| GAGGGAGA | 10               | 78               | $1.36 \times 10^{-14}$ | -2.96 |
| GAGGGAGG | 10               | 86               | $2.50 \times 10^{-16}$ | -3.10 |
| GAGGGCA  | 39               | 150              | $1.26 \times 10^{-19}$ | -1.94 |
| GAGGGCAG | 15               | 63               | $1.47 \times 10^{-09}$ | -2.07 |
| GAGGGGA  | 38               | 181              | $2.17 \times 10^{-26}$ | -2.25 |
| GAGGGGAG | 7                | 69               | $8.39 \times 10^{-14}$ | -3.30 |
| GAGGGGG  | 36               | 181              | $4.36 \times 10^{-27}$ | -2.33 |
| GAGGTAG  | 15               | 79               | $5.99 \times 10^{-13}$ | -2.40 |
| GAGGTGG  | 59               | 197              | $8.16 \times 10^{-23}$ | -1.74 |
| GAGGTGGG | 12               | 73               | $9.36 \times 10^{-13}$ | -2.60 |
| GAGGTTG  | 42               | 132              | $4.74 \times 10^{-15}$ | -1.65 |
| GAGTACA  | 20               | 67               | $9.35 \times 10^{-09}$ | -1.74 |
| GAGTAG   | 81               | 258              | $3.06 \times 10^{-28}$ | -1.67 |
| GAGTAGA  | 21               | 84               | $6.24 \times 10^{-12}$ | -2.00 |
| GAGTAGG  | 16               | 65               | $1.22 \times 10^{-09}$ | -2.02 |

Continued on next page...



Table 5 – continued from previous page

| Element  | Count next to SS | Background count | Chi-square test        | LOD   |
|----------|------------------|------------------|------------------------|-------|
| GAGTGGG  | 45               | 156              | $6.26 \times 10^{-19}$ | -1.79 |
| GAGTTGG  | 31               | 113              | $1.22 \times 10^{-14}$ | -1.87 |
| GATAAGG  | 22               | 66               | $6.09 \times 10^{-08}$ | -1.58 |
| GATAGAG  | 17               | 74               | $3.44 \times 10^{-11}$ | -2.12 |
| GATAGGA  | 20               | 69               | $3.66 \times 10^{-09}$ | -1.79 |
| GATGAGG  | 36               | 125              | $1.71 \times 10^{-15}$ | -1.80 |
| GATGGAG  | 46               | 149              | $3.22 \times 10^{-17}$ | -1.70 |
| GATTACAG | 14               | 65               | $2.52 \times 10^{-10}$ | -2.22 |
| GATTAGA  | 25               | 81               | $4.90 \times 10^{-10}$ | -1.70 |
| GATTTCG  | 23               | 72               | $7.70 \times 10^{-09}$ | -1.65 |
| GATTGGG  | 24               | 73               | $9.75 \times 10^{-09}$ | -1.60 |
| GATTTGAA | 21               | 64               | $7.66 \times 10^{-08}$ | -1.61 |
| GCAAAGA  | 36               | 109              | $2.70 \times 10^{-12}$ | -1.60 |
| GCAAAGG  | 26               | 94               | $2.32 \times 10^{-12}$ | -1.85 |
| GCAAGAA  | 21               | 107              | $9.24 \times 10^{-17}$ | -2.35 |
| GCAAGAG  | 29               | 107              | $4.67 \times 10^{-14}$ | -1.88 |
| GCAAGGA  | 23               | 110              | $1.08 \times 10^{-16}$ | -2.26 |
| GCAAGGG  | 25               | 83               | $1.93 \times 10^{-10}$ | -1.73 |
| GCACAGAG | 12               | 64               | $8.03 \times 10^{-11}$ | -2.42 |
| GCAGAAG  | 51               | 155              | $6.61 \times 10^{-17}$ | -1.60 |
| GCAGAGA  | 47               | 179              | $5.81 \times 10^{-23}$ | -1.93 |
| GCAGAGAG | 12               | 64               | $8.03 \times 10^{-11}$ | -2.42 |
| GCAGAGG  | 64               | 213              | $1.79 \times 10^{-24}$ | -1.73 |
| GCAGAGGG | 18               | 65               | $5.55 \times 10^{-09}$ | -1.85 |
| GCAGCTGG | 15               | 67               | $2.11 \times 10^{-10}$ | -2.16 |
| GCAGGA   | 175              | 539              | $2.06 \times 10^{-55}$ | -1.62 |
| GCAGGAA  | 38               | 148              | $1.54 \times 10^{-19}$ | -1.96 |
| GCAGGAG  | 43               | 217              | $3.37 \times 10^{-32}$ | -2.34 |
| GCAGGAGA | 7                | 81               | $2.00 \times 10^{-16}$ | -3.53 |
| GCAGGAGG | 11               | 73               | $3.97 \times 10^{-13}$ | -2.73 |
| GCAGGCAG | 14               | 66               | $1.55 \times 10^{-10}$ | -2.24 |
| GCAGGGA  | 51               | 185              | $6.70 \times 10^{-23}$ | -1.86 |
| GCAGGGAG | 14               | 74               | $3.06 \times 10^{-12}$ | -2.40 |
| GCAGGTGG | 20               | 69               | $3.66 \times 10^{-09}$ | -1.79 |
| GCAGTAG  | 21               | 75               | $4.50 \times 10^{-10}$ | -1.84 |
| GCAGTGAG | 22               | 71               | $6.05 \times 10^{-09}$ | -1.69 |
| GCATAGA  | 20               | 64               | $3.80 \times 10^{-08}$ | -1.68 |
| GCATTAG  | 22               | 66               | $6.09 \times 10^{-08}$ | -1.58 |
| GCCAAGA  | 27               | 105              | $2.69 \times 10^{-14}$ | -1.96 |
| GCCAGAA  | 31               | 103              | $1.30 \times 10^{-12}$ | -1.73 |
| GCCAGGA  | 47               | 167              | $1.60 \times 10^{-20}$ | -1.83 |
| GCCAGGAG | 16               | 71               | $6.69 \times 10^{-11}$ | -2.15 |

Continued on next page...

Table 5 – continued from previous page

| Element   | Count next to SS | Background count | Chi-square test        | LOD   |
|-----------|------------------|------------------|------------------------|-------|
| GCCCAGAG  | 18               | 64               | $8.92 \times 10^{-09}$ | -1.83 |
| GCCCAGGA  | 20               | 68               | $5.85 \times 10^{-09}$ | -1.77 |
| GCCTGGAG  | 17               | 78               | $4.95 \times 10^{-12}$ | -2.20 |
| GCCTGGGG  | 21               | 79               | $6.77 \times 10^{-11}$ | -1.91 |
| GCGAGA    | 24               | 80               | $3.82 \times 10^{-10}$ | -1.74 |
| GCGGGGG   | 24               | 83               | $9.41 \times 10^{-11}$ | -1.79 |
| GCTAGGA   | 17               | 74               | $3.44 \times 10^{-11}$ | -2.12 |
| GCTAGGG   | 19               | 64               | $1.85 \times 10^{-08}$ | -1.75 |
| GCTGCAGG  | 21               | 70               | $4.72 \times 10^{-09}$ | -1.74 |
| GCTGGAGG  | 18               | 71               | $3.17 \times 10^{-10}$ | -1.98 |
| GCTGGGA   | 54               | 255              | $2.46 \times 10^{-36}$ | -2.24 |
| GCTGGGAT  | 13               | 88               | $1.29 \times 10^{-15}$ | -2.76 |
| GCTGGGGA  | 13               | 65               | $1.12 \times 10^{-10}$ | -2.32 |
| GCTGGGGG  | 22               | 68               | $2.43 \times 10^{-08}$ | -1.63 |
| GCTTGGG   | 38               | 116              | $4.41 \times 10^{-13}$ | -1.61 |
| GGAAAAG   | 54               | 171              | $3.63 \times 10^{-19}$ | -1.66 |
| GGAAAGA   | 54               | 180              | $5.90 \times 10^{-21}$ | -1.74 |
| GGAAAGG   | 29               | 171              | $1.80 \times 10^{-27}$ | -2.56 |
| GGAACAG   | 31               | 110              | $4.98 \times 10^{-14}$ | -1.83 |
| GGAAGA    | 192              | 636              | $2.13 \times 10^{-69}$ | -1.73 |
| GGAAGAA   | 52               | 209              | $1.78 \times 10^{-27}$ | -2.01 |
| GGAAGAAA  | 14               | 78               | $4.27 \times 10^{-13}$ | -2.48 |
| GGAAGAG   | 39               | 194              | $9.08 \times 10^{-29}$ | -2.31 |
| GGAAGAGA  | 9                | 67               | $1.38 \times 10^{-12}$ | -2.90 |
| GGAAGAGG  | 11               | 72               | $6.53 \times 10^{-13}$ | -2.71 |
| GGAAGAT   | 41               | 124              | $9.07 \times 10^{-14}$ | -1.60 |
| GGAAGG    | 199              | 658              | $1.26 \times 10^{-71}$ | -1.73 |
| GGAAGGA   | 52               | 222              | $3.72 \times 10^{-30}$ | -2.09 |
| GGAAGGAA  | 10               | 83               | $1.12 \times 10^{-15}$ | -3.05 |
| GGAAGGAG  | 9                | 74               | $4.15 \times 10^{-14}$ | -3.04 |
| GGAAGGG   | 39               | 216              | $2.09 \times 10^{-33}$ | -2.47 |
| GGAAGGGA  | 8                | 65               | $1.55 \times 10^{-12}$ | -3.02 |
| GGAAGGGG  | 8                | 69               | $2.08 \times 10^{-13}$ | -3.11 |
| GGAATAG   | 16               | 79               | $1.36 \times 10^{-12}$ | -2.30 |
| GGACAAG   | 24               | 94               | $5.20 \times 10^{-13}$ | -1.97 |
| GGAGAA    | 216              | 656              | $3.65 \times 10^{-66}$ | -1.60 |
| GGAGAAAA  | 23               | 73               | $4.85 \times 10^{-09}$ | -1.67 |
| GGAGAAAAG | 12               | 63               | $1.31 \times 10^{-10}$ | -2.39 |
| GGAGAAG   | 43               | 219              | $1.28 \times 10^{-32}$ | -2.35 |
| GGAGAAGA  | 11               | 64               | $3.47 \times 10^{-11}$ | -2.54 |
| GGAGAAGG  | 12               | 78               | $7.83 \times 10^{-14}$ | -2.70 |
| GGAGAGA   | 51               | 220              | $4.45 \times 10^{-30}$ | -2.11 |

Continued on next page...

Table 5 – continued from previous page

| Element  | Count next to SS | Background count | Chi-square test        | LOD   |
|----------|------------------|------------------|------------------------|-------|
| GGAGAGAG | 13               | 95               | $3.99 \times 10^{-17}$ | -2.87 |
| GGAGAGC  | 43               | 134              | $3.80 \times 10^{-15}$ | -1.64 |
| GGAGAGG  | 56               | 209              | $3.55 \times 10^{-26}$ | -1.90 |
| GGAGAGGA | 15               | 70               | $4.90 \times 10^{-11}$ | -2.22 |
| GGAGAGGG | 14               | 68               | $5.81 \times 10^{-11}$ | -2.28 |
| GGAGATA  | 27               | 92               | $1.23 \times 10^{-11}$ | -1.77 |
| GGAGATG  | 51               | 157              | $2.67 \times 10^{-17}$ | -1.62 |
| GGAGCAA  | 23               | 84               | $2.82 \times 10^{-11}$ | -1.87 |
| GGAGCAG  | 56               | 205              | $2.30 \times 10^{-25}$ | -1.87 |
| GGAGCAGG | 15               | 64               | $9.06 \times 10^{-10}$ | -2.09 |
| GGAGCTGG | 12               | 77               | $1.29 \times 10^{-13}$ | -2.68 |
| GGAGGA   | 150              | 682              | $2.83 \times 10^{-92}$ | -2.18 |
| GGAGGAA  | 41               | 181              | $2.32 \times 10^{-25}$ | -2.14 |
| GGAGGAAG | 8                | 70               | $1.26 \times 10^{-13}$ | -3.13 |
| GGAGGAC  | 29               | 96               | $8.01 \times 10^{-12}$ | -1.73 |
| GGAGGAG  | 43               | 280              | $1.52 \times 10^{-45}$ | -2.70 |
| GGAGGAGA | 11               | 71               | $1.07 \times 10^{-12}$ | -2.69 |
| GGAGGAGG | 13               | 109              | $3.74 \times 10^{-20}$ | -3.07 |
| GGAGGAT  | 32               | 115              | $9.94 \times 10^{-15}$ | -1.85 |
| GGAGGCA  | 39               | 163              | $2.66 \times 10^{-22}$ | -2.06 |
| GGAGGCAG | 11               | 79               | $2.00 \times 10^{-14}$ | -2.84 |
| GGAGGCG  | 14               | 66               | $1.55 \times 10^{-10}$ | -2.24 |
| GGAGGG   | 215              | 765              | $5.11 \times 10^{-88}$ | -1.83 |
| GGAGGGA  | 38               | 213              | $3.94 \times 10^{-33}$ | -2.49 |
| GGAGGGAA | 10               | 70               | $7.42 \times 10^{-13}$ | -2.81 |
| GGAGGGAG | 8                | 95               | $4.41 \times 10^{-19}$ | -3.57 |
| GGAGGGC  | 47               | 158              | $1.04 \times 10^{-18}$ | -1.75 |
| GGAGGGG  | 56               | 224              | $3.06 \times 10^{-29}$ | -2.00 |
| GGAGGGGA | 15               | 75               | $4.26 \times 10^{-12}$ | -2.32 |
| GGAGGGGG | 13               | 73               | $2.18 \times 10^{-12}$ | -2.49 |
| GGAGGTGG | 15               | 79               | $5.99 \times 10^{-13}$ | -2.40 |
| GGAGTAG  | 20               | 66               | $1.49 \times 10^{-08}$ | -1.72 |
| GGAGTGG  | 30               | 153              | $2.67 \times 10^{-23}$ | -2.35 |
| GGATAGA  | 16               | 71               | $6.69 \times 10^{-11}$ | -2.15 |
| GGATCAG  | 23               | 77               | $7.56 \times 10^{-10}$ | -1.74 |
| GGATCG   | 20               | 74               | $3.44 \times 10^{-10}$ | -1.89 |
| GGATGAG  | 34               | 116              | $2.66 \times 10^{-14}$ | -1.77 |
| GGATGGA  | 42               | 134              | $1.90 \times 10^{-15}$ | -1.67 |
| GGATGGG  | 42               | 158              | $2.74 \times 10^{-20}$ | -1.91 |
| GGATTAC  | 19               | 85               | $8.14 \times 10^{-13}$ | -2.16 |
| GGATTAG  | 11               | 64               | $3.47 \times 10^{-11}$ | -2.54 |
| GGATTGG  | 20               | 75               | $2.14 \times 10^{-10}$ | -1.91 |

Continued on next page...

Table 5 – continued from previous page

| Element  | Count next to SS | Background count | Chi-square test        | LOD   |
|----------|------------------|------------------|------------------------|-------|
| GGCAAG   | 122              | 373              | $1.27 \times 10^{-38}$ | -1.61 |
| GGCAAGA  | 23               | 118              | $2.22 \times 10^{-18}$ | -2.36 |
| GGCAAGG  | 27               | 101              | $1.79 \times 10^{-13}$ | -1.90 |
| GGCAGA   | 177              | 585              | $7.37 \times 10^{-64}$ | -1.72 |
| GGCAGAA  | 40               | 140              | $2.87 \times 10^{-17}$ | -1.81 |
| GGCAGAC  | 31               | 95               | $5.15 \times 10^{-11}$ | -1.62 |
| GGCAGAG  | 65               | 245              | $1.31 \times 10^{-30}$ | -1.91 |
| GGCAGAGA | 6                | 70               | $2.02 \times 10^{-14}$ | -3.54 |
| GGCAGAGG | 18               | 94               | $4.54 \times 10^{-15}$ | -2.38 |
| GGCAGGA  | 53               | 211              | $1.47 \times 10^{-27}$ | -1.99 |
| GGCAGGAG | 14               | 98               | $2.15 \times 10^{-17}$ | -2.81 |
| GGCAGGGA | 14               | 70               | $2.18 \times 10^{-11}$ | -2.32 |
| GGCATGG  | 40               | 130              | $2.93 \times 10^{-15}$ | -1.70 |
| GGCGAGG  | 16               | 63               | $3.19 \times 10^{-09}$ | -1.98 |
| GGCTGGGA | 19               | 63               | $2.96 \times 10^{-08}$ | -1.73 |
| GGGAAAG  | 38               | 161              | $3.19 \times 10^{-22}$ | -2.08 |
| GGGAAG   | 170              | 657              | $1.63 \times 10^{-80}$ | -1.95 |
| GGGAAGA  | 43               | 191              | $9.20 \times 10^{-27}$ | -2.15 |
| GGGAAGAG | 12               | 64               | $8.03 \times 10^{-11}$ | -2.42 |
| GGGAAGG  | 43               | 225              | $6.98 \times 10^{-34}$ | -2.39 |
| GGGAAGGA | 9                | 66               | $2.28 \times 10^{-12}$ | -2.87 |
| GGGAAGGG | 9                | 73               | $6.85 \times 10^{-14}$ | -3.02 |
| GGGAAGT  | 37               | 118              | $8.86 \times 10^{-14}$ | -1.67 |
| GGGAGAA  | 52               | 200              | $1.24 \times 10^{-25}$ | -1.94 |
| GGGAGAAG | 8                | 82               | $3.03 \times 10^{-16}$ | -3.36 |
| GGGAGAG  | 49               | 241              | $3.87 \times 10^{-35}$ | -2.30 |
| GGGAGAGA | 8                | 67               | $5.67 \times 10^{-13}$ | -3.07 |
| GGGAGAGG | 12               | 88               | $5.42 \times 10^{-16}$ | -2.87 |
| GGGAGCA  | 40               | 129              | $4.64 \times 10^{-15}$ | -1.69 |
| GGGAGG   | 229              | 823              | $2.86 \times 10^{-95}$ | -1.85 |
| GGGAGGA  | 39               | 185              | $7.01 \times 10^{-27}$ | -2.25 |
| GGGAGGAG | 4                | 78               | $5.34 \times 10^{-17}$ | -4.29 |
| GGGAGGG  | 66               | 312              | $4.29 \times 10^{-44}$ | -2.24 |
| GGGAGGGA | 7                | 88               | $5.88 \times 10^{-18}$ | -3.65 |
| GGGAGGGG | 12               | 108              | $2.52 \times 10^{-20}$ | -3.17 |
| GGGAGGT  | 46               | 139              | $3.06 \times 10^{-15}$ | -1.60 |
| GGGAGGTG | 17               | 75               | $2.12 \times 10^{-11}$ | -2.14 |
| GGGATGG  | 47               | 150              | $4.09 \times 10^{-17}$ | -1.67 |
| GGGATGGG | 18               | 63               | $1.43 \times 10^{-08}$ | -1.81 |
| GGGATTA  | 40               | 121              | $1.79 \times 10^{-13}$ | -1.60 |
| GGGATTG  | 32               | 98               | $2.61 \times 10^{-11}$ | -1.61 |
| GGGCAAG  | 29               | 129              | $1.31 \times 10^{-18}$ | -2.15 |

Continued on next page...

Table 5 – continued from previous page

| Element  | Count next to SS | Background count | Chi-square test        | LOD   |
|----------|------------------|------------------|------------------------|-------|
| GGGCAGAG | 24               | 75               | $3.88 \times 10^{-09}$ | -1.64 |
| GGGCAGGG | 31               | 107              | $2.02 \times 10^{-13}$ | -1.79 |
| GGGCGGGG | 21               | 64               | $7.66 \times 10^{-08}$ | -1.61 |
| GGGGAA   | 163              | 537              | $1.31 \times 10^{-58}$ | -1.72 |
| GGGGAAA  | 49               | 165              | $1.70 \times 10^{-19}$ | -1.75 |
| GGGGAAAA | 16               | 70               | $1.09 \times 10^{-10}$ | -2.13 |
| GGGGAAC  | 26               | 83               | $3.93 \times 10^{-10}$ | -1.67 |
| GGGGAAG  | 37               | 199              | $1.58 \times 10^{-30}$ | -2.43 |
| GGGGAAGG | 6                | 67               | $9.16 \times 10^{-14}$ | -3.48 |
| GGGGAG   | 199              | 677              | $2.13 \times 10^{-75}$ | -1.77 |
| GGGGAGA  | 43               | 193              | $3.53 \times 10^{-27}$ | -2.17 |
| GGGGAGAG | 11               | 84               | $1.65 \times 10^{-15}$ | -2.93 |
| GGGGAGG  | 54               | 279              | $2.31 \times 10^{-41}$ | -2.37 |
| GGGGAGGA | 5                | 64               | $1.64 \times 10^{-13}$ | -3.68 |
| GGGGAGGG | 11               | 111              | $2.27 \times 10^{-21}$ | -3.33 |
| GGGGATG  | 43               | 132              | $9.43 \times 10^{-15}$ | -1.62 |
| GGGGCAA  | 22               | 69               | $1.53 \times 10^{-08}$ | -1.65 |
| GGGGCAGG | 28               | 90               | $6.34 \times 10^{-11}$ | -1.68 |
| GGGGGA   | 139              | 480              | $1.24 \times 10^{-54}$ | -1.79 |
| GGGGGAA  | 31               | 140              | $3.19 \times 10^{-20}$ | -2.18 |
| GGGGGAG  | 27               | 171              | $3.33 \times 10^{-28}$ | -2.66 |
| GGGGGAGG | 7                | 73               | $1.12 \times 10^{-14}$ | -3.38 |
| GGGGGCA  | 44               | 139              | $7.75 \times 10^{-16}$ | -1.66 |
| GGGGGCAG | 19               | 67               | $4.51 \times 10^{-09}$ | -1.82 |
| GGGGGG   | 176              | 533              | $5.96 \times 10^{-54}$ | -1.60 |
| GGGGGGA  | 25               | 116              | $2.93 \times 10^{-17}$ | -2.21 |
| GGGGGGG  | 47               | 205              | $2.57 \times 10^{-28}$ | -2.12 |
| GGGGGGGG | 18               | 102              | $8.99 \times 10^{-17}$ | -2.50 |
| GGGGGTGG | 20               | 82               | $7.55 \times 10^{-12}$ | -2.04 |
| GGGGTGGG | 25               | 112              | $2.02 \times 10^{-16}$ | -2.16 |
| GGGTAGG  | 17               | 82               | $7.06 \times 10^{-13}$ | -2.27 |
| GGGTGGA  | 36               | 126              | $1.07 \times 10^{-15}$ | -1.81 |
| GGGTGGG  | 96               | 289              | $7.11 \times 10^{-30}$ | -1.59 |
| GGGTGGGG | 33               | 135              | $1.65 \times 10^{-18}$ | -2.03 |
| GGGTTAG  | 14               | 64               | $4.10 \times 10^{-10}$ | -2.19 |
| GGGTTGG  | 36               | 125              | $1.71 \times 10^{-15}$ | -1.80 |
| GGTAAGG  | 16               | 78               | $2.21 \times 10^{-12}$ | -2.29 |
| GGTACAG  | 20               | 77               | $8.26 \times 10^{-11}$ | -1.94 |
| GGTAGAG  | 23               | 97               | $5.75 \times 10^{-14}$ | -2.08 |
| GGTAGG   | 72               | 277              | $7.25 \times 10^{-35}$ | -1.94 |
| GGTAGGA  | 18               | 70               | $5.12 \times 10^{-10}$ | -1.96 |
| GGTAGGG  | 15               | 83               | $8.39 \times 10^{-14}$ | -2.47 |

Continued on next page...

Table 5 – continued from previous page

| Element  | Count next to SS | Background count | Chi-square test        | LOD   |
|----------|------------------|------------------|------------------------|-------|
| GGTAGGT  | 19               | 74               | $1.62 \times 10^{-10}$ | -1.96 |
| GGTATGG  | 18               | 63               | $1.43 \times 10^{-08}$ | -1.81 |
| GGTCAGG  | 39               | 126              | $9.13 \times 10^{-15}$ | -1.69 |
| GGTGAAG  | 34               | 108              | $1.07 \times 10^{-12}$ | -1.67 |
| GGTGAGGG | 16               | 64               | $1.97 \times 10^{-09}$ | -2.00 |
| GGTGCTGG | 22               | 69               | $1.53 \times 10^{-08}$ | -1.65 |
| GGTGGAG  | 47               | 171              | $2.47 \times 10^{-21}$ | -1.86 |
| GGTGGAGG | 10               | 66               | $5.45 \times 10^{-12}$ | -2.72 |
| GGTGGGA  | 52               | 187              | $5.47 \times 10^{-23}$ | -1.85 |
| GGTGGGAG | 15               | 79               | $5.99 \times 10^{-13}$ | -2.40 |
| GGTGGGG  | 70               | 264              | $7.27 \times 10^{-33}$ | -1.92 |
| GGTGGGGA | 8                | 73               | $2.79 \times 10^{-14}$ | -3.19 |
| GGTGGGGG | 17               | 90               | $1.41 \times 10^{-14}$ | -2.40 |
| GGTGGTGG | 14               | 66               | $1.55 \times 10^{-10}$ | -2.24 |
| GGTGTGG  | 44               | 148              | $1.24 \times 10^{-17}$ | -1.75 |
| GGTTAAG  | 25               | 78               | $1.96 \times 10^{-09}$ | -1.64 |
| GGTTAGG  | 18               | 65               | $5.55 \times 10^{-09}$ | -1.85 |
| GGTTGCA  | 23               | 81               | $1.16 \times 10^{-10}$ | -1.82 |
| GGTTGGG  | 29               | 121              | $6.07 \times 10^{-17}$ | -2.06 |
| GGTTTAG  | 21               | 77               | $1.75 \times 10^{-10}$ | -1.87 |
| GTAAGGG  | 17               | 64               | $4.23 \times 10^{-09}$ | -1.91 |
| GTACAGA  | 28               | 91               | $3.99 \times 10^{-11}$ | -1.70 |
| GTAGAAG  | 21               | 89               | $5.67 \times 10^{-13}$ | -2.08 |
| GTAGAG   | 88               | 316              | $1.16 \times 10^{-37}$ | -1.84 |
| GTAGAGA  | 29               | 133              | $1.91 \times 10^{-19}$ | -2.20 |
| GTAGAGC  | 21               | 65               | $4.83 \times 10^{-08}$ | -1.63 |
| GTAGAGG  | 20               | 78               | $5.12 \times 10^{-11}$ | -1.96 |
| GTAGCAG  | 16               | 83               | $1.92 \times 10^{-13}$ | -2.38 |
| GTAGGA   | 74               | 277              | $3.19 \times 10^{-34}$ | -1.90 |
| GTAGGAA  | 20               | 83               | $4.67 \times 10^{-12}$ | -2.05 |
| GTAGGAG  | 12               | 73               | $9.36 \times 10^{-13}$ | -2.60 |
| GTAGGCA  | 20               | 71               | $1.42 \times 10^{-09}$ | -1.83 |
| GTAGGG   | 59               | 226              | $1.13 \times 10^{-28}$ | -1.94 |
| GTAGGGA  | 16               | 69               | $1.76 \times 10^{-10}$ | -2.11 |
| GTAGGGG  | 19               | 67               | $4.51 \times 10^{-09}$ | -1.82 |
| GTCAGGA  | 29               | 111              | $7.07 \times 10^{-15}$ | -1.94 |
| GTCAGGG  | 38               | 115              | $6.95 \times 10^{-13}$ | -1.60 |
| GTCCAGA  | 26               | 88               | $3.86 \times 10^{-11}$ | -1.76 |
| GTGAGCCA | 17               | 67               | $1.01 \times 10^{-09}$ | -1.98 |
| GTGAGGA  | 45               | 147              | $3.99 \times 10^{-17}$ | -1.71 |
| GTGAGGG  | 34               | 149              | $4.45 \times 10^{-21}$ | -2.13 |
| GTGCAGG  | 51               | 154              | $1.04 \times 10^{-16}$ | -1.59 |

Continued on next page...

Table 5 – continued from previous page

| Element  | Count next to SS | Background count | Chi-square test        | LOD   |
|----------|------------------|------------------|------------------------|-------|
| GTGCTGGG | 23               | 98               | $3.56 \times 10^{-14}$ | -2.09 |
| GTGGAAG  | 38               | 126              | $4.51 \times 10^{-15}$ | -1.73 |
| GTGGAGA  | 40               | 150              | $2.66 \times 10^{-19}$ | -1.91 |
| GTGGAGG  | 36               | 163              | $2.58 \times 10^{-23}$ | -2.18 |
| GTGGGA   | 180              | 556              | $2.95 \times 10^{-57}$ | -1.63 |
| GTGGGAG  | 41               | 198              | $6.55 \times 10^{-29}$ | -2.27 |
| GTGGGAGG | 8                | 75               | $1.02 \times 10^{-14}$ | -3.23 |
| GTGGGGA  | 47               | 186              | $2.14 \times 10^{-24}$ | -1.98 |
| GTGGGGAG | 10               | 69               | $1.22 \times 10^{-12}$ | -2.79 |
| GTGGGGG  | 51               | 202              | $2.29 \times 10^{-26}$ | -1.99 |
| GTGGGGGG | 12               | 73               | $9.36 \times 10^{-13}$ | -2.60 |
| GTGGGTGG | 19               | 71               | $6.77 \times 10^{-10}$ | -1.90 |
| GTGGTAG  | 18               | 86               | $2.25 \times 10^{-13}$ | -2.26 |
| GTGGTGG  | 62               | 204              | $2.72 \times 10^{-23}$ | -1.72 |
| GTGTAGA  | 18               | 71               | $3.17 \times 10^{-10}$ | -1.98 |
| GTGTAGG  | 13               | 65               | $1.12 \times 10^{-10}$ | -2.32 |
| GTGTGGGG | 17               | 64               | $4.23 \times 10^{-09}$ | -1.91 |
| GTTAGG   | 52               | 208              | $2.86 \times 10^{-27}$ | -2.00 |
| GTTAGGA  | 15               | 76               | $2.61 \times 10^{-12}$ | -2.34 |
| GTTGCAG  | 19               | 94               | $1.03 \times 10^{-14}$ | -2.31 |
| GTTGGAG  | 21               | 90               | $3.51 \times 10^{-13}$ | -2.10 |
| GTTGGGA  | 26               | 128              | $1.95 \times 10^{-19}$ | -2.30 |
| GTTGGGG  | 29               | 109              | $1.82 \times 10^{-14}$ | -1.91 |
| GTTGTAG  | 23               | 86               | $1.09 \times 10^{-11}$ | -1.90 |
| GTTTAGG  | 19               | 69               | $1.75 \times 10^{-09}$ | -1.86 |
| TAAGGA   | 25               | 77               | $3.10 \times 10^{-09}$ | -1.62 |
| TACAGG   | 118              | 369              | $5.05 \times 10^{-39}$ | -1.64 |
| TACAGGC  | 17               | 100              | $1.04 \times 10^{-16}$ | -2.56 |
| TACAGGG  | 24               | 85               | $3.68 \times 10^{-11}$ | -1.82 |
| TACCAGG  | 24               | 72               | $1.54 \times 10^{-08}$ | -1.58 |
| TAGAACA  | 31               | 107              | $2.02 \times 10^{-13}$ | -1.79 |
| TAGAAGA  | 36               | 117              | $6.96 \times 10^{-14}$ | -1.70 |
| TAGAAGC  | 28               | 86               | $3.99 \times 10^{-10}$ | -1.62 |
| TAGAAGG  | 27               | 98               | $7.38 \times 10^{-13}$ | -1.86 |
| TAGACAG  | 23               | 72               | $7.70 \times 10^{-09}$ | -1.65 |
| TAGAGAAA | 21               | 63               | $1.21 \times 10^{-07}$ | -1.58 |
| TAGAGAG  | 30               | 115              | $2.25 \times 10^{-15}$ | -1.94 |
| TAGAGG   | 102              | 317              | $1.41 \times 10^{-33}$ | -1.64 |
| TAGAGGA  | 18               | 91               | $1.97 \times 10^{-14}$ | -2.34 |
| TAGAGGC  | 22               | 70               | $9.63 \times 10^{-09}$ | -1.67 |
| TAGAGGG  | 18               | 70               | $5.12 \times 10^{-10}$ | -1.96 |
| TAGATAG  | 16               | 73               | $2.53 \times 10^{-11}$ | -2.19 |

Continued on next page...

Table 5 – continued from previous page

| Element  | Count next to SS | Background count | Chi-square test        | LOD   |
|----------|------------------|------------------|------------------------|-------|
| TAGATGG  | 27               | 84               | $4.99 \times 10^{-10}$ | -1.64 |
| TAGCAAG  | 23               | 84               | $2.82 \times 10^{-11}$ | -1.87 |
| TAGCAGA  | 24               | 89               | $5.57 \times 10^{-12}$ | -1.89 |
| TAGCAGC  | 24               | 83               | $9.41 \times 10^{-11}$ | -1.79 |
| TAGCTAG  | 14               | 64               | $4.10 \times 10^{-10}$ | -2.19 |
| TAGCTGG  | 28               | 97               | $2.45 \times 10^{-12}$ | -1.79 |
| TAGGAAG  | 27               | 122              | $7.89 \times 10^{-18}$ | -2.18 |
| TAGGACA  | 16               | 70               | $1.09 \times 10^{-10}$ | -2.13 |
| TAGGAG   | 91               | 323              | $3.97 \times 10^{-38}$ | -1.83 |
| TAGGAGA  | 19               | 108              | $1.09 \times 10^{-17}$ | -2.51 |
| TAGGAGG  | 15               | 79               | $5.99 \times 10^{-13}$ | -2.40 |
| TAGGCAG  | 12               | 88               | $5.42 \times 10^{-16}$ | -2.87 |
| TAGGCCA  | 20               | 63               | $6.04 \times 10^{-08}$ | -1.66 |
| TAGGGA   | 81               | 312              | $4.36 \times 10^{-39}$ | -1.95 |
| TAGGGAA  | 28               | 104              | $9.15 \times 10^{-14}$ | -1.89 |
| TAGGGAG  | 14               | 97               | $3.53 \times 10^{-17}$ | -2.79 |
| TAGGGAT  | 22               | 75               | $9.36 \times 10^{-10}$ | -1.77 |
| TAGGGCA  | 19               | 72               | $4.21 \times 10^{-10}$ | -1.92 |
| TAGGGG   | 77               | 256              | $4.66 \times 10^{-29}$ | -1.73 |
| TAGGGGA  | 15               | 83               | $8.39 \times 10^{-14}$ | -2.47 |
| TAGGTGC  | 21               | 64               | $7.66 \times 10^{-08}$ | -1.61 |
| TAGGTGG  | 19               | 64               | $1.85 \times 10^{-08}$ | -1.75 |
| TAGTACA  | 22               | 69               | $1.53 \times 10^{-08}$ | -1.65 |
| TAGTAGA  | 20               | 91               | $9.84 \times 10^{-14}$ | -2.19 |
| TAGTGGG  | 17               | 73               | $5.59 \times 10^{-11}$ | -2.10 |
| TAGTTGG  | 22               | 73               | $2.38 \times 10^{-09}$ | -1.73 |
| TATAGG   | 74               | 230              | $8.08 \times 10^{-25}$ | -1.64 |
| TATAGGA  | 22               | 78               | $2.28 \times 10^{-10}$ | -1.83 |
| TATGAGG  | 22               | 75               | $9.36 \times 10^{-10}$ | -1.77 |
| TATGCAG  | 23               | 79               | $2.96 \times 10^{-10}$ | -1.78 |
| TATGGGG  | 21               | 82               | $1.62 \times 10^{-11}$ | -1.97 |
| TATGTAG  | 29               | 93               | $3.21 \times 10^{-11}$ | -1.68 |
| TATTAGC  | 19               | 65               | $1.16 \times 10^{-08}$ | -1.77 |
| TCAAAAAA | 24               | 94               | $5.20 \times 10^{-13}$ | -1.97 |
| TCAAGGG  | 21               | 73               | $1.16 \times 10^{-09}$ | -1.80 |
| TCAGGGG  | 35               | 109              | $1.36 \times 10^{-12}$ | -1.64 |
| TCCAAGA  | 28               | 104              | $9.15 \times 10^{-14}$ | -1.89 |
| TCCAAGG  | 36               | 111              | $1.09 \times 10^{-12}$ | -1.62 |
| TCCAGAG  | 49               | 149              | $2.56 \times 10^{-16}$ | -1.60 |
| TCCAGGA  | 48               | 171              | $5.13 \times 10^{-21}$ | -1.83 |
| TCCCAAAG | 11               | 72               | $6.53 \times 10^{-13}$ | -2.71 |
| TCCCAGAG | 13               | 67               | $4.19 \times 10^{-11}$ | -2.37 |

Continued on next page...



Table 5 – continued from previous page

| Element  | Count next to SS | Background count | Chi-square test        | LOD   |
|----------|------------------|------------------|------------------------|-------|
| TCCCAGGG | 22               | 73               | $2.38 \times 10^{-09}$ | -1.73 |
| TCCCCAGG | 23               | 69               | $3.06 \times 10^{-08}$ | -1.58 |
| TCCTAGG  | 22               | 92               | $2.92 \times 10^{-13}$ | -2.06 |
| TCCTGCAG | 21               | 65               | $4.83 \times 10^{-08}$ | -1.63 |
| TCCTGGAG | 20               | 67               | $9.35 \times 10^{-09}$ | -1.74 |
| TCCTGGGA | 18               | 64               | $8.92 \times 10^{-09}$ | -1.83 |
| TCCTGGGG | 16               | 65               | $1.22 \times 10^{-09}$ | -2.02 |
| TCGAAC   | 27               | 82               | $1.25 \times 10^{-09}$ | -1.60 |
| TCGAGA   | 24               | 84               | $5.88 \times 10^{-11}$ | -1.81 |
| TCGGGA   | 35               | 116              | $5.44 \times 10^{-14}$ | -1.73 |
| TCGTAG   | 21               | 64               | $7.66 \times 10^{-08}$ | -1.61 |
| TCTAGAG  | 25               | 95               | $6.87 \times 10^{-13}$ | -1.93 |
| TCTAGGG  | 9                | 67               | $1.38 \times 10^{-12}$ | -2.90 |
| TCTCCAGG | 18               | 64               | $8.92 \times 10^{-09}$ | -1.83 |
| TCTGGAG  | 49               | 148              | $4.02 \times 10^{-16}$ | -1.59 |
| TCTGTAG  | 36               | 120              | $1.74 \times 10^{-14}$ | -1.74 |
| TGAGCCAC | 27               | 95               | $3.02 \times 10^{-12}$ | -1.81 |
| TGAGGAA  | 60               | 197              | $1.65 \times 10^{-22}$ | -1.72 |
| TGAGGAAA | 23               | 77               | $7.56 \times 10^{-10}$ | -1.74 |
| TGAGGAG  | 47               | 162              | $1.63 \times 10^{-19}$ | -1.79 |
| TGAGGAGG | 6                | 66               | $1.52 \times 10^{-13}$ | -3.46 |
| TGAGGCAG | 15               | 79               | $5.99 \times 10^{-13}$ | -2.40 |
| TGCAAGG  | 27               | 95               | $3.02 \times 10^{-12}$ | -1.81 |
| TGCAGAG  | 65               | 204              | $2.19 \times 10^{-22}$ | -1.65 |
| TGCAGGA  | 35               | 160              | $4.96 \times 10^{-23}$ | -2.19 |
| TGCAGGG  | 48               | 165              | $8.33 \times 10^{-20}$ | -1.78 |
| TGCAGGTG | 19               | 74               | $1.62 \times 10^{-10}$ | -1.96 |
| TGCTAGG  | 16               | 79               | $1.36 \times 10^{-12}$ | -2.30 |
| TGCTGGGA | 12               | 101              | $8.29 \times 10^{-19}$ | -3.07 |
| TGGAAGA  | 43               | 173              | $4.88 \times 10^{-23}$ | -2.01 |
| TGGAAGG  | 53               | 162              | $1.09 \times 10^{-17}$ | -1.61 |
| TGGAGAA  | 60               | 209              | $6.55 \times 10^{-25}$ | -1.80 |
| TGGAGAAG | 12               | 81               | $1.76 \times 10^{-14}$ | -2.75 |
| TGGAGAG  | 57               | 188              | $1.24 \times 10^{-21}$ | -1.72 |
| TGGAGCA  | 42               | 129              | $1.86 \times 10^{-14}$ | -1.62 |
| TGGAGCAG | 19               | 67               | $4.51 \times 10^{-09}$ | -1.82 |
| TGGAGG   | 204              | 650              | $1.54 \times 10^{-68}$ | -1.67 |
| TGGAGGA  | 30               | 186              | $2.67 \times 10^{-30}$ | -2.63 |
| TGGAGGAG | 8                | 83               | $1.83 \times 10^{-16}$ | -3.38 |
| TGGAGGG  | 43               | 182              | $6.78 \times 10^{-25}$ | -2.08 |
| TGGAGGTG | 20               | 65               | $2.38 \times 10^{-08}$ | -1.70 |
| TGGATAG  | 22               | 71               | $6.05 \times 10^{-09}$ | -1.69 |

Continued on next page...

Table 5 – continued from previous page

| Element  | Count next to SS | Background count | Chi-square test        | LOD   |
|----------|------------------|------------------|------------------------|-------|
| TGGCAAG  | 27               | 100              | $2.87 \times 10^{-13}$ | -1.89 |
| TGGCAGA  | 44               | 151              | $3.10 \times 10^{-18}$ | -1.78 |
| TGGCAGAG | 11               | 64               | $3.47 \times 10^{-11}$ | -2.54 |
| TGGCCAGG | 18               | 69               | $8.26 \times 10^{-10}$ | -1.94 |
| TGGGAAG  | 45               | 214              | $7.12 \times 10^{-31}$ | -2.25 |
| TGGGAAGA | 14               | 67               | $9.48 \times 10^{-11}$ | -2.26 |
| TGGGAAGG | 9                | 64               | $6.19 \times 10^{-12}$ | -2.83 |
| TGGGACA  | 42               | 130              | $1.18 \times 10^{-14}$ | -1.63 |
| TGGGAG   | 239              | 720              | $7.06 \times 10^{-72}$ | -1.59 |
| TGGGAGA  | 50               | 184              | $5.13 \times 10^{-23}$ | -1.88 |
| TGGGAGAG | 6                | 66               | $1.52 \times 10^{-13}$ | -3.46 |
| TGGGAGG  | 48               | 254              | $3.20 \times 10^{-38}$ | -2.40 |
| TGGGAGGA | 13               | 69               | $1.57 \times 10^{-11}$ | -2.41 |
| TGGGAGGC | 12               | 63               | $1.31 \times 10^{-10}$ | -2.39 |
| TGGGAGGG | 10               | 64               | $1.48 \times 10^{-11}$ | -2.68 |
| TGGGATTA | 18               | 84               | $5.96 \times 10^{-13}$ | -2.22 |
| TGGGCAA  | 41               | 133              | $1.49 \times 10^{-15}$ | -1.70 |
| TGGGCAGG | 18               | 86               | $2.25 \times 10^{-13}$ | -2.26 |
| TGGGCTGG | 19               | 63               | $2.96 \times 10^{-08}$ | -1.73 |
| TGGGGAA  | 57               | 187              | $1.96 \times 10^{-21}$ | -1.71 |
| TGGGGAAG | 11               | 71               | $1.07 \times 10^{-12}$ | -2.69 |
| TGGGGAG  | 58               | 262              | $2.01 \times 10^{-36}$ | -2.18 |
| TGGGGAGA | 14               | 74               | $3.06 \times 10^{-12}$ | -2.40 |
| TGGGGAGG | 15               | 91               | $1.62 \times 10^{-15}$ | -2.60 |
| TGGGGCAG | 18               | 65               | $5.55 \times 10^{-09}$ | -1.85 |
| TGGGGGA  | 40               | 180              | $1.71 \times 10^{-25}$ | -2.17 |
| TGGGGGAG | 4                | 64               | $6.38 \times 10^{-14}$ | -4.00 |
| TGGGGGG  | 60               | 180              | $3.73 \times 10^{-19}$ | -1.58 |
| TGGGTGGG | 27               | 94               | $4.82 \times 10^{-12}$ | -1.80 |
| TGGTAGA  | 31               | 106              | $3.22 \times 10^{-13}$ | -1.77 |
| TGGTAGG  | 19               | 74               | $1.62 \times 10^{-10}$ | -1.96 |
| TGGTGCA  | 33               | 103              | $5.29 \times 10^{-12}$ | -1.64 |
| TGTAGAG  | 22               | 96               | $4.26 \times 10^{-14}$ | -2.13 |
| TGTAGG   | 83               | 326              | $2.71 \times 10^{-41}$ | -1.97 |
| TGTAGGA  | 23               | 94               | $2.42 \times 10^{-13}$ | -2.03 |
| TGTAGGC  | 12               | 64               | $8.03 \times 10^{-11}$ | -2.42 |
| TGTAGGG  | 12               | 77               | $1.29 \times 10^{-13}$ | -2.68 |
| TGTAGGT  | 29               | 88               | $3.18 \times 10^{-10}$ | -1.60 |
| TGTCAGG  | 37               | 120              | $3.54 \times 10^{-14}$ | -1.70 |
| TGTGGGA  | 42               | 175              | $8.80 \times 10^{-24}$ | -2.06 |
| TGTGTAG  | 39               | 122              | $5.71 \times 10^{-14}$ | -1.65 |
| TGTGTGGG | 20               | 69               | $3.66 \times 10^{-09}$ | -1.79 |

Continued on next page...

Table 5 – continued from previous page

| Element  | Count next to SS | Background count | Chi-square test        | LOD   |
|----------|------------------|------------------|------------------------|-------|
| TGTTAGG  | 13               | 81               | $4.17 \times 10^{-14}$ | -2.64 |
| TTAAGGG  | 20               | 67               | $9.35 \times 10^{-09}$ | -1.74 |
| TTACAGG  | 46               | 139              | $3.06 \times 10^{-15}$ | -1.60 |
| TTAGAGG  | 23               | 80               | $1.85 \times 10^{-10}$ | -1.80 |
| TTAGGAG  | 23               | 92               | $6.30 \times 10^{-13}$ | -2.00 |
| TTAGGCA  | 23               | 69               | $3.06 \times 10^{-08}$ | -1.58 |
| TTAGGG   | 88               | 292              | $7.42 \times 10^{-33}$ | -1.73 |
| TTAGGGA  | 20               | 95               | $1.42 \times 10^{-14}$ | -2.25 |
| TTAGGGG  | 16               | 78               | $2.21 \times 10^{-12}$ | -2.29 |
| TTAGTAG  | 24               | 90               | $3.47 \times 10^{-12}$ | -1.91 |
| TTAGTGG  | 21               | 71               | $2.96 \times 10^{-09}$ | -1.76 |
| TTCCAGA  | 47               | 160              | $4.12 \times 10^{-19}$ | -1.77 |
| TTCCAGG  | 45               | 168              | $2.31 \times 10^{-21}$ | -1.90 |
| TTCCTAG  | 34               | 111              | $2.70 \times 10^{-13}$ | -1.71 |
| TTCGGA   | 20               | 68               | $5.85 \times 10^{-09}$ | -1.77 |
| TTCGGG   | 33               | 99               | $3.28 \times 10^{-11}$ | -1.58 |
| TTCTAGG  | 26               | 95               | $1.45 \times 10^{-12}$ | -1.87 |
| TTGCAGG  | 28               | 122              | $1.73 \times 10^{-17}$ | -2.12 |
| TTGCCAG  | 40               | 125              | $2.90 \times 10^{-14}$ | -1.64 |
| TTGGAAG  | 45               | 153              | $2.51 \times 10^{-18}$ | -1.77 |
| TTGGAGG  | 24               | 150              | $7.97 \times 10^{-25}$ | -2.64 |
| TTGGCAG  | 36               | 133              | $4.06 \times 10^{-17}$ | -1.89 |
| TTGGGA   | 183              | 563              | $9.72 \times 10^{-58}$ | -1.62 |
| TTGGGAAG | 9                | 66               | $2.28 \times 10^{-12}$ | -2.87 |
| TTGGGAG  | 30               | 187              | $1.64 \times 10^{-30}$ | -2.64 |
| TTGGGAGG | 3                | 66               | $8.84 \times 10^{-15}$ | -4.46 |
| TTGGGCA  | 35               | 135              | $7.51 \times 10^{-18}$ | -1.95 |
| TTGGGGA  | 48               | 163              | $2.10 \times 10^{-19}$ | -1.76 |
| TTGGGGAG | 10               | 63               | $2.43 \times 10^{-11}$ | -2.66 |
| TTGGGGG  | 50               | 154              | $5.26 \times 10^{-17}$ | -1.62 |
| TTGGTAG  | 22               | 81               | $5.54 \times 10^{-11}$ | -1.88 |
| TTGTAGA  | 43               | 129              | $3.67 \times 10^{-14}$ | -1.58 |
| TTGTAGG  | 17               | 81               | $1.15 \times 10^{-12}$ | -2.25 |
| TTTAGAG  | 45               | 137              | $3.83 \times 10^{-15}$ | -1.61 |
| TTTAGGG  | 21               | 113              | $4.94 \times 10^{-18}$ | -2.43 |
| TTTCCCAG | 20               | 65               | $2.38 \times 10^{-08}$ | -1.70 |
| TTTCCTGG | 21               | 67               | $1.91 \times 10^{-08}$ | -1.67 |
| TTTGGAG  | 45               | 172              | $3.53 \times 10^{-22}$ | -1.93 |
| TTTGGAGA | 15               | 63               | $1.47 \times 10^{-09}$ | -2.07 |
| TTTGGGA  | 54               | 182              | $2.35 \times 10^{-21}$ | -1.75 |
| TTTGGGAA | 20               | 65               | $2.38 \times 10^{-08}$ | -1.70 |
| TTTTAGG  | 42               | 144              | $1.89 \times 10^{-17}$ | -1.78 |

Continued on next page...

Table 5 – continued from previous page

| Element  | Count next to SS | Background count | Chi-square test        | LOD   |
|----------|------------------|------------------|------------------------|-------|
| TTTTCCAG | 12               | 72               | $1.54 \times 10^{-12}$ | -2.58 |

## References

- [1] Stamm S, Riethoven JJ, Le Texier V, Gopalakrishnan C, Kumanduri V, Tang Y, Barbosa-Morais N, Thanaraj T: **ASD: a bioinformatics resource on alternative splicing.** *Nucleic Acids Research* 2006, **34**:D46–D55.
- [2] Vořechovský I, Královičová J: **Global control of aberrant splice-site activation by auxiliary splicing sequences: evidence for a gradient in exon and intron definition.** *Nucleic acids research* 2007, **35**(19):6399–6413.
- [3] Churbanov A, Rogozin I, Deogun J, Ali H: **Method of predicting Splice Sites based on signal interactions.** *Biology Direct* 2006, **1**(10).
- [4] Fairbrother W, Yeh R, Sharp P, Burge C: **Predictive identification of exonic splicing enhancers in human genes.** *Science* 2002, **297**(5583):1007–1013.
- [5] Wang Z, Rolish M, Yeo G, Tung V, Mawson M, Burge C: **Systematic identification and analysis of exonic splicing silencers.** *Cell* 2004, **119**:831–845.
